# Supplementary material for: RUNX1-EVI1 disrupts lineage determination and the cell cycle by interfering with RUNX1 and EVI1 driven gene regulatory networks
Source: PubMed Central journal article supplement — Haematologica. 2020 Apr 16;106(6):1569–80. doi: 10.3324/haematol.2019.241885 (PMC8168488; doi:10.3324/haematol.2019.241885), 2020-04-16
Supplement: 2019_241885_KELLAWAY_SUPPL.pdf [file 2019_241885_KELLAWAY_SUPPL.pdf]

## **RUNX1-EVI1 disrupts lineage determination and the cell cycle by interfering with RUNX1 and EVI1 driven gene regulatory networks**

**Sophie G. Kellaway, Peter Keane, Ella Kennett and Constanze Bonifer**

Institute of Cancer and Genomic Sciences, University of Birmingham, Birmingham, UK

©2021 Ferrata Storti Foundation. This is an open-access paper. doi:10.3324/haematol.2019.241885

Received: November 5, 2019.

Accepted: April 9, 2020.

Pre-published: April 16, 2020.

Correspondence: *CONSTANZE BONIFER* - c.bonifer@bham.ac.uk

---

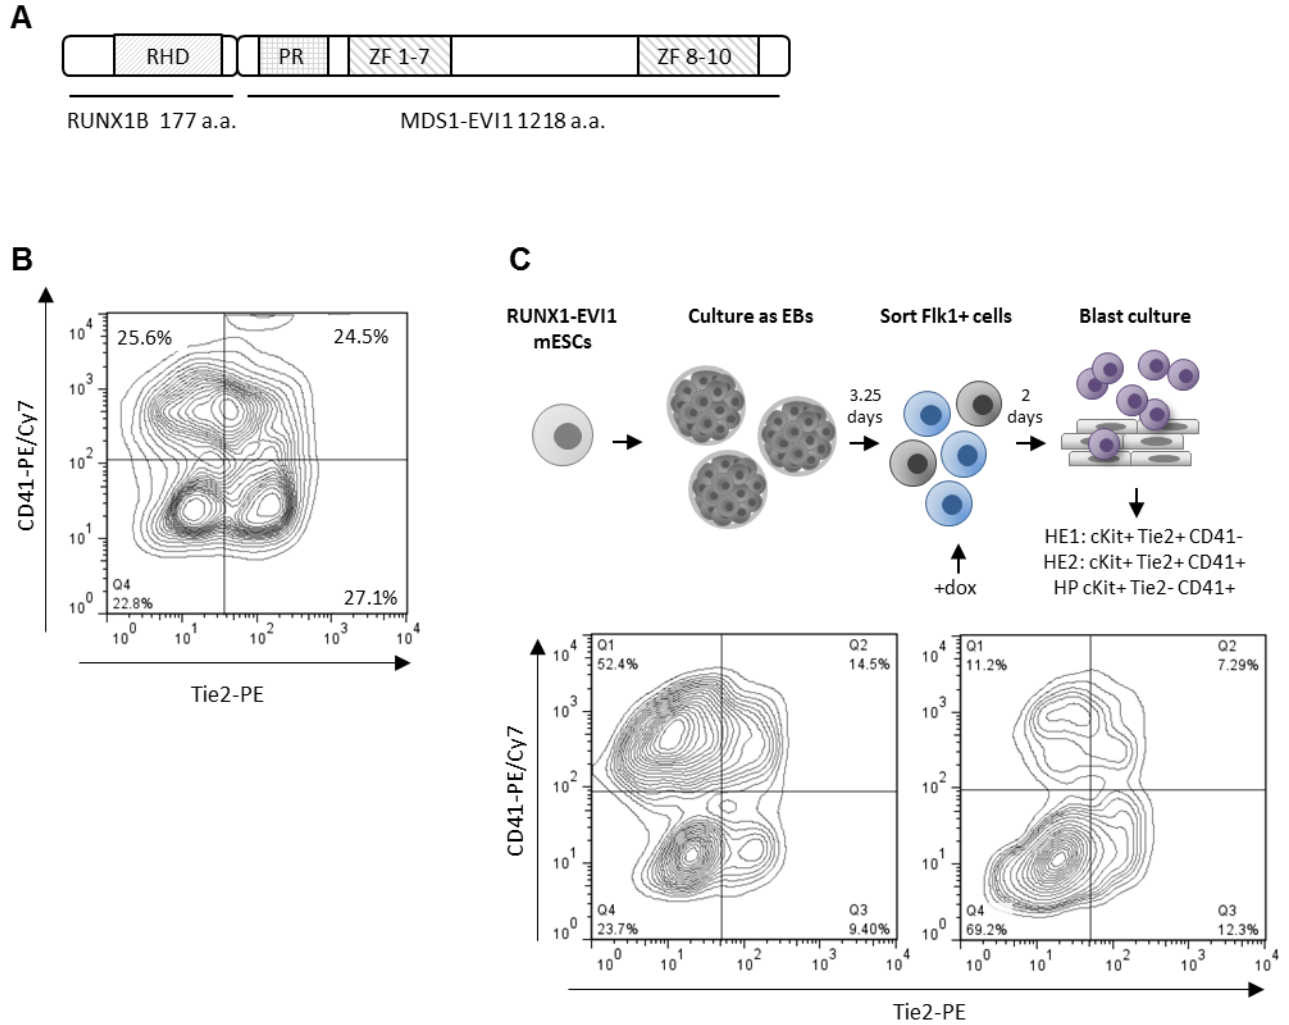

**Supplementary Figure 1 Induction of RUNX1-EVI1 perturbs *Runx1* dependent endothelial to haematopoietic transition.** (A) Structure of the RUNX1-EVI1 fusion protein structure, with the Runt homology domain (RHD), PRD1-BF1/RIZ1 (PR) domain and zinc fingers (ZF 1-7 and ZF 8-10) shown (B) The composition of the day 1 blast culture, at the point of dox induction, was analysed by flow cytometry using antibodies against cKit, Tie2 and CD41, a representative plot pre-gated by cKit+ is shown on which there are an approximately equal balance of HE1, HE2, HP and double negative cells (C) The composition of the day 2 blast culture, 2 days following dox induction in the Flk1+ cells as shown in the schematic, was analysed by flow cytometry using antibodies against cKit, Tie2 and CD41; representative plots for –dox and +dox samples are shown pre-gated by cKit+. This prevented almost all formation of HE1, HE2 or HP cells.

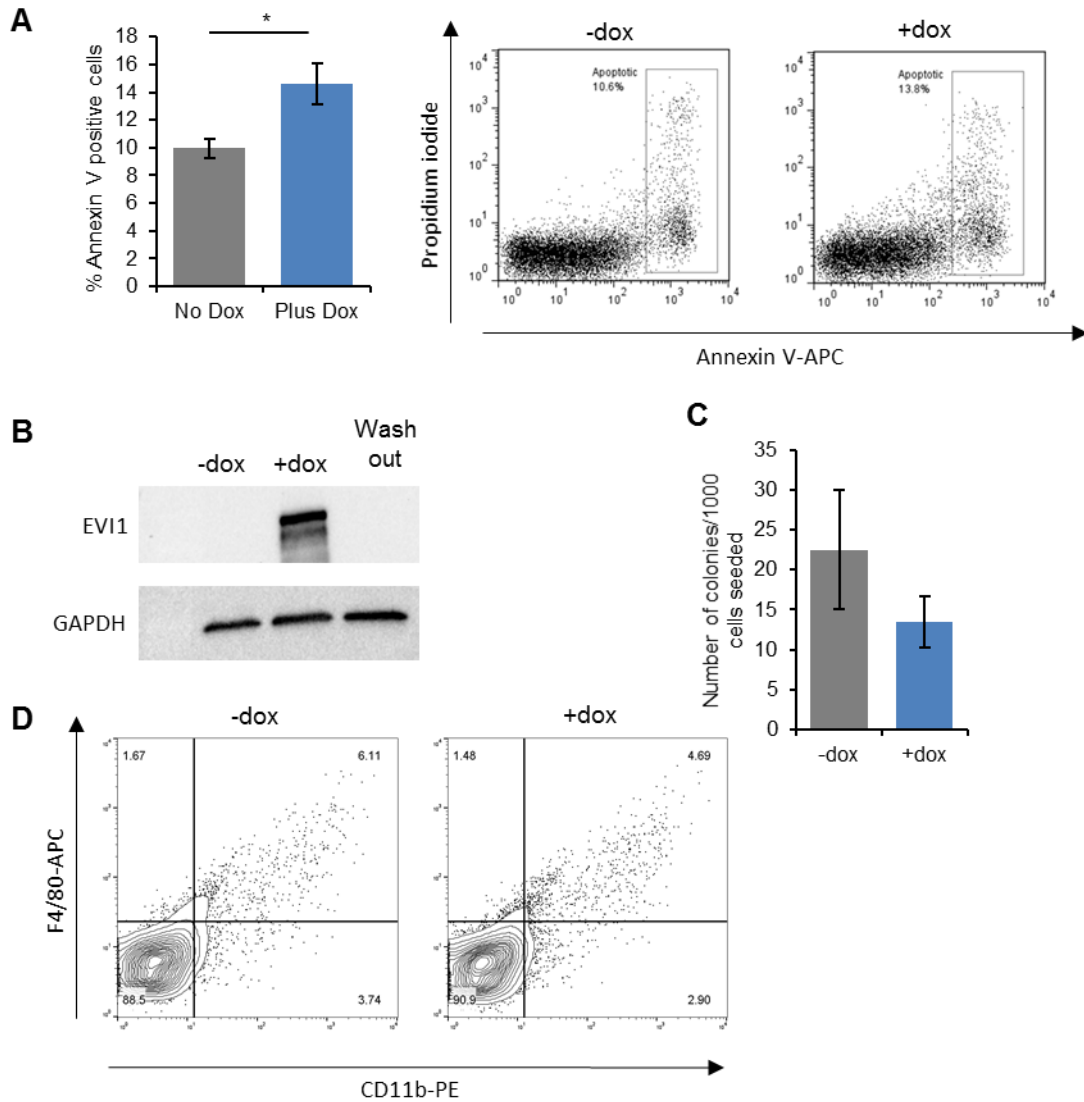

**Supplementary Figure 2 RUNX1-EVI1 expression causes reduced cell cycling and colony forming capacity in HPs.** (A) RUNX1-EVI1 induction caused a small but variable increase in apoptotic cells in the total d2 blast culture, n=5, \* represents p<0.05, example FACS plots are shown on the right (B) RUNX1-EVI1 expression was not maintained in cells in those colony forming assays where dox was withdrawn, shown here 24 hours post washout (C) Reduced colony forming capacity was unrelated to reduced cKit expression, a similar reduction in colonies formed was seen when cKit positive sorted HPs were used with prior dox induction and withdrawal, n=4, difference was not significant. Error bars indicate standard error of the mean (D) HP cells matured for a further 24 hours in liquid culture did not show enhanced myeloid differentiation, analysed by flow cytometry using antibodies against CD11b and F4/80, representative plots are shown n=2.

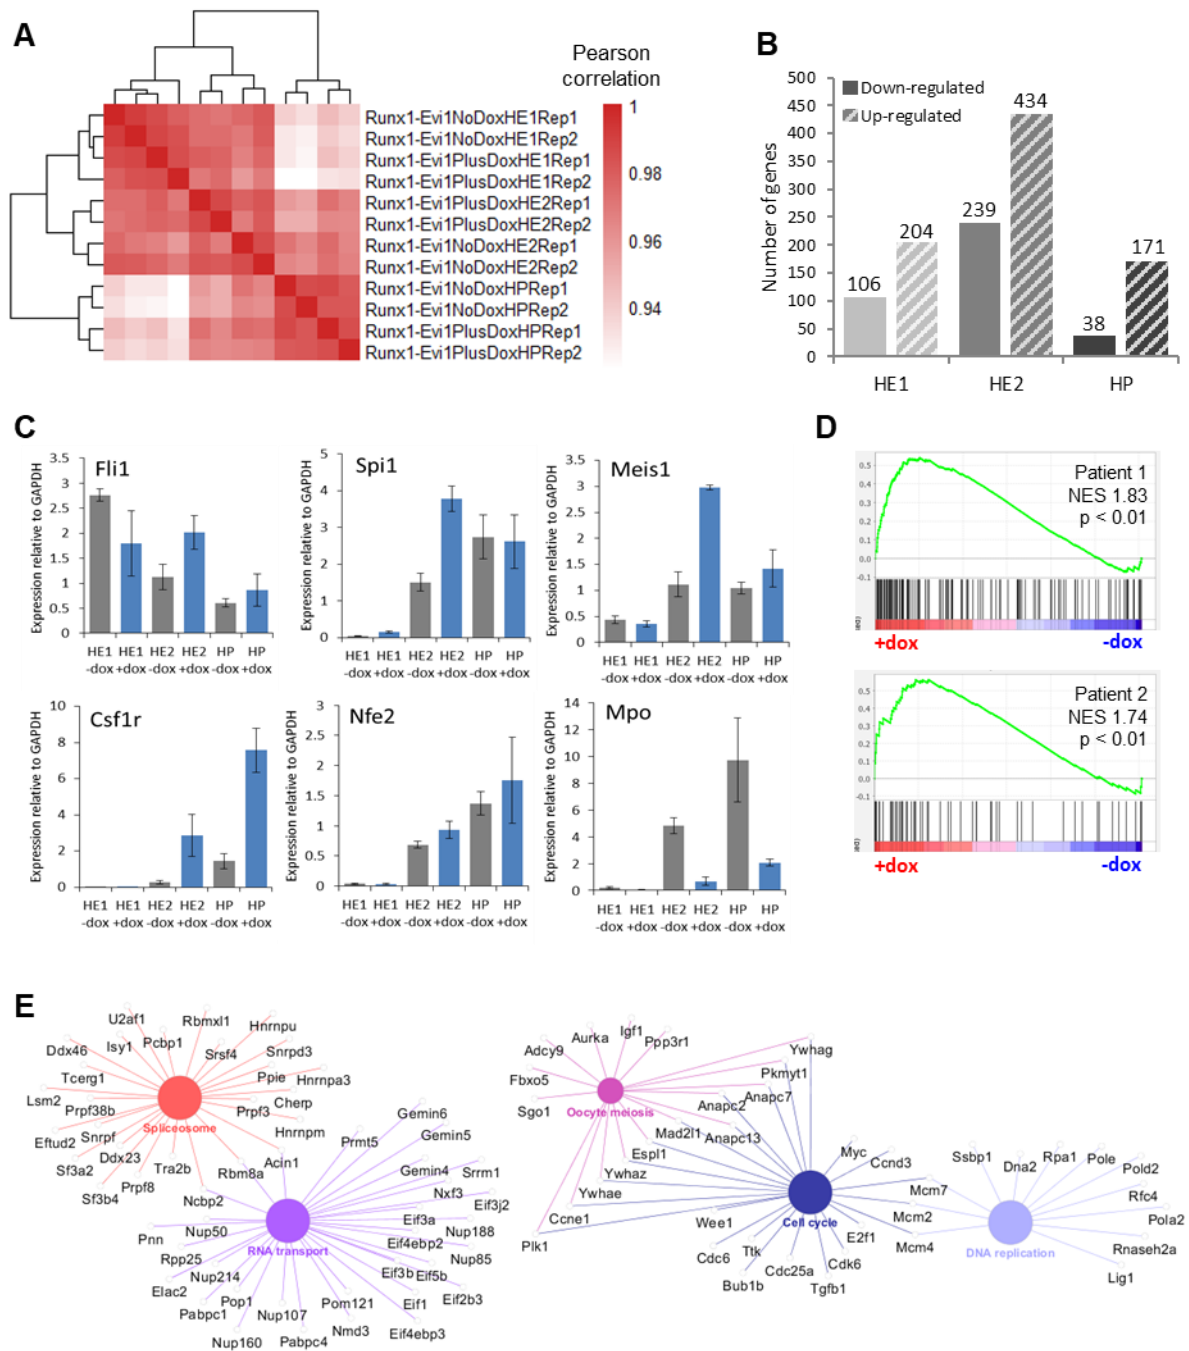

**Supplementary Figure 3 Gene expression was de-regulated in a stage-specific manner following RUNX1-EVI1 induction.** (A) Hierarchical clustering of pearson correlations of all expressed genes show that RNA-seq data cluster according to replicate, by cell type and by +/- dox (B) The number of genes which were de-regulated by at least 2-fold (adj. p-value < 0.05) at each stage (C) Manual validation of selected genes identified in RNA-seq analysis was performed using qRT-PCR, all normalised to *Gapdh*, n=3, error bars indicate standard error of the mean (D) Gene set enrichment analysis showed genes upregulated after RUNX1-EVI1 induction in HPs corresponded closely to those genes which are specific to t(3;21) patients i.e. at least 2-fold upregulated as compared to healthy CD34+ cells<sup>1</sup> (E) KEGG pathway enrichment analysis of 2-fold downregulated genes in HE2, with differentially expressed genes associated with each enriched pathway shown

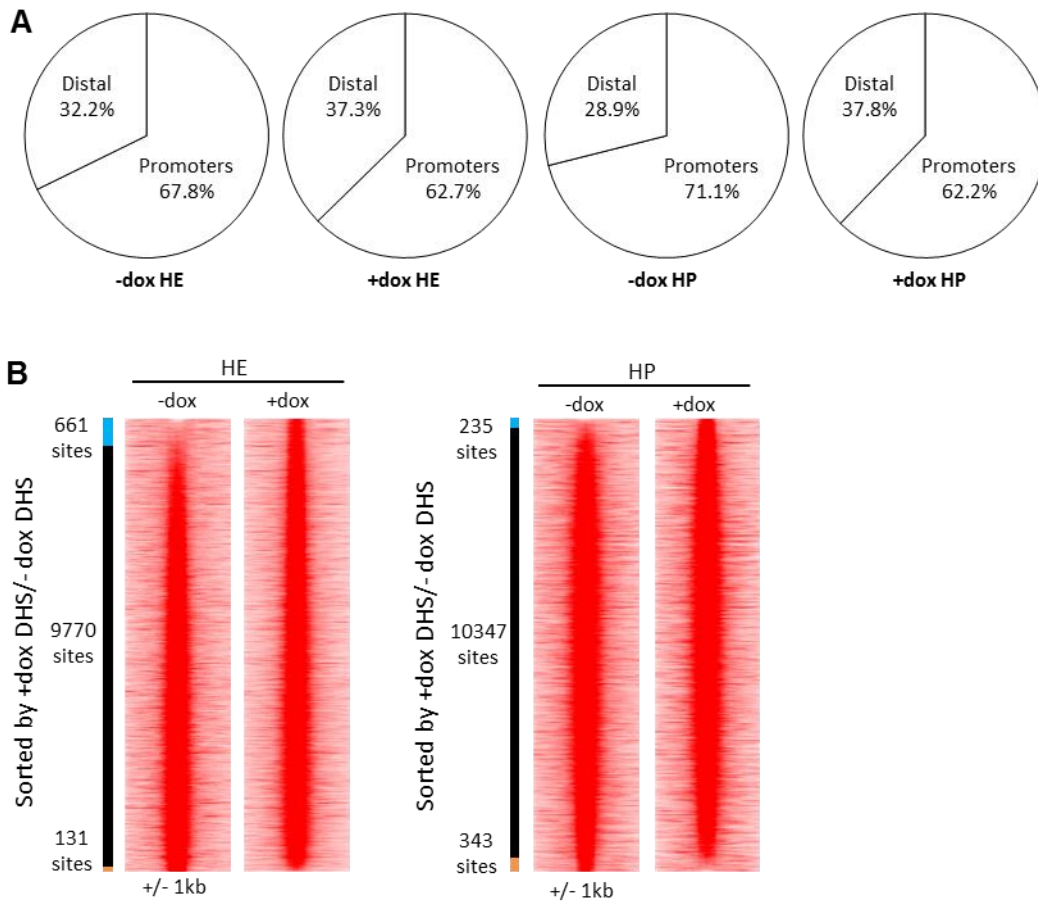

**Supplementary Figure 4 RUNX1-EVI1 induction causes specific changes to chromatin accessibility.**

(A) Pie charts showing the distribution of DNase-seq peaks between distal elements and promoters  
 (B) Promoter DHSs in HE cells (cKit+, Tie2+, CD41-/+ ) and HP cells (cKit+, Tie2-, CD41+) were ranked by fold change +dox/-dox of the normalized tag count across a 2kb window. Sites were determined as specific if there was at least a 2-fold change. The bar alongside indicates the +dox specific sites (blue), shared sites (black) and -dox specific sites (orange).

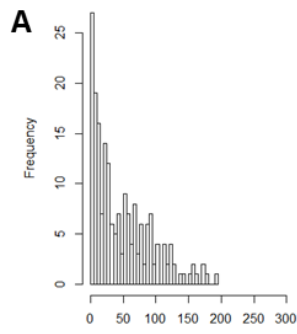

Proximity of -dox RUNX1 summits to RUNX1-EVI1 summits

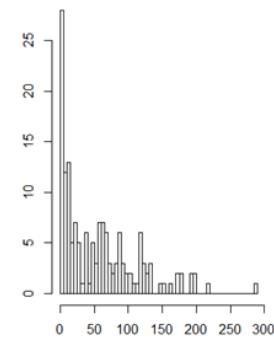

Proximity of +dox RUNX1 summits to RUNX1-EVI1 summits

**B**

+dox RUNX1 (distal) motifs

| Motif | Match    | % of sites | p-value |
|-------|----------|------------|---------|
|       | ETS/PU.1 | 33.77      | 1e-113  |
|       | Sp       | 23.49      | 1e-22   |
|       | RUNX     | 22.35      | 1e-47   |
|       | GATA     | 22.02      | 1e-59   |
|       | AP-1     | 17.29      | 1e-33   |

Shared RUNX1 (distal) motifs

| Motif | Match    | % of sites | p-value |
|-------|----------|------------|---------|
|       | ETS/PU.1 | 37.05      | 1e-73   |
|       | RUNX     | 36.32      | 1e-68   |
|       | GATA     | 25.42      | 1e-62   |
|       | AP-1     | 16.71      | 1e-23   |

-dox RUNX1 (distal) motifs

| Motif | Match    | % of sites | p-value |
|-------|----------|------------|---------|
|       | ETS/PU.1 | 38.46      | 1e-41   |
|       | RUNX     | 37.79      | 1e-71   |
|       | GATA     | 37.12      | 1e-44   |

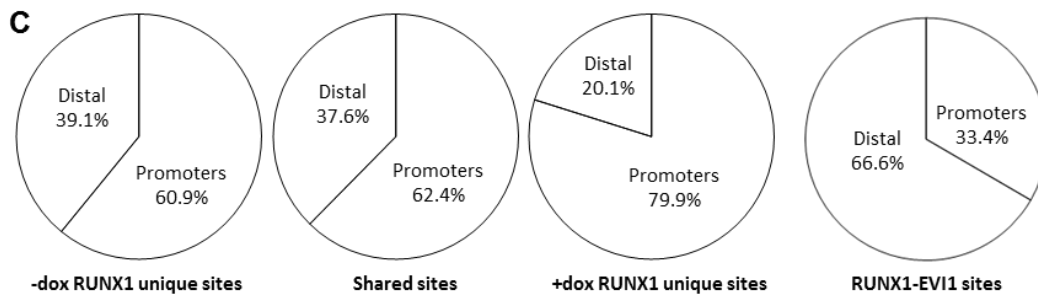

**D**

chr5:125183503-125183902 Ncor2      chr4: 21712205-21712604 Ccnc

```

TACCTGCCCGCCCCAACGCCACCCCAAAACACAGGAATCAGCAAATGG      GAGGTGCTGCCACTGTGGACAGCTCCTGTGGCACAGCTCCTGCAGTGGTA
GAAAGGAAGCCGTAGTTTCCATCATTACAGTATGGAGGAGGGACTGGCTG      TTCTACTAAGACTAGAGCTGAGACAGGAAAGAAAGTTGTGGACAGCTCCTC
TGTACCAGGCAGGCTAGAGTACTGTAGCGGTAGCCGTACTACTATGGT      ATGACAGCCATAGTCTGAAGCAGGAAAGATATTGCCACCGTGGACAGCTC
GGGGCGGGGGTGGAAATCTCAGGCCATAGGATGATCCATCCTCTCCAAG      CTGAGGGGCTGCTTTCGCTGAGGAGGGAAATGAGATGCTCCAGCTACCGT
CTATGCAAGCATCTCCGAGGATTGTGGTTTGGAGCCCCCAGCCTTCCACCC      GGACAGCTCCTGTGACAGCAGCAGGCTGAGCGGAAAGTACACAGCGGGCGA
TCCACCCGCTTACCACAAGAAACTGCAGAGTCAACCCGCTTCCGCGTCCG      TTTTGGACAGCTCCTTCTAGGGCATCTCACTGAGGCCACAGGCTGAGGCA
TCTGGACTTTATTTGGGCACTGCCAAGCATTTCACAAGGGGCTGAGCAG      GGGAGGAGGAGCCAGCGCCCTCGACTGATTTCCGGATGTTGCTTAGGGA
GGAACCACGAGGACCCGAGCGCTGTGGTCTTGGCTGTTAGTGGCCGGAG      CTACAGAAGTTGTAAGCACAAAACATAATCTGAGTTGATGGACTTCAGT

```

**Supplementary Figure 5 RUNX1-EVI1 disrupts to RUNX1 binding and has unique binding sites too.**

(A) Histograms showing the proximity of the closest RUNX1 -/+dox ChIP-seq peak summits to RUNX1-EVI1 ChIP-seq summits in peaks that were bound by RUNX1-EVI1 in the +dox cells, and by RUNX1 in the -dox (top) and +dox (bottom) cells (B) De novo motif enrichment was performed within RUNX1 ChIP-seq peaks, at both the uniquely called peaks and those shared between - and +dox. (C) Pie charts showing the distribution of CHIP peaks between distal elements and promoters (D) DNA sequences underlying the ChIP-seq peaks shown in Figure 5D, with ETS motifs highlighted in

blue and RUNX motif highlighted in red. On the left is the Ncor -3 element which is bound by both RUNX1 and RUNX1-EVI1, on the right is the Ccnc -15 element which is bound by RUNX1-EVI1 alone. Chromosomal coordinates shown correspond to version mm10 of the mouse genome.

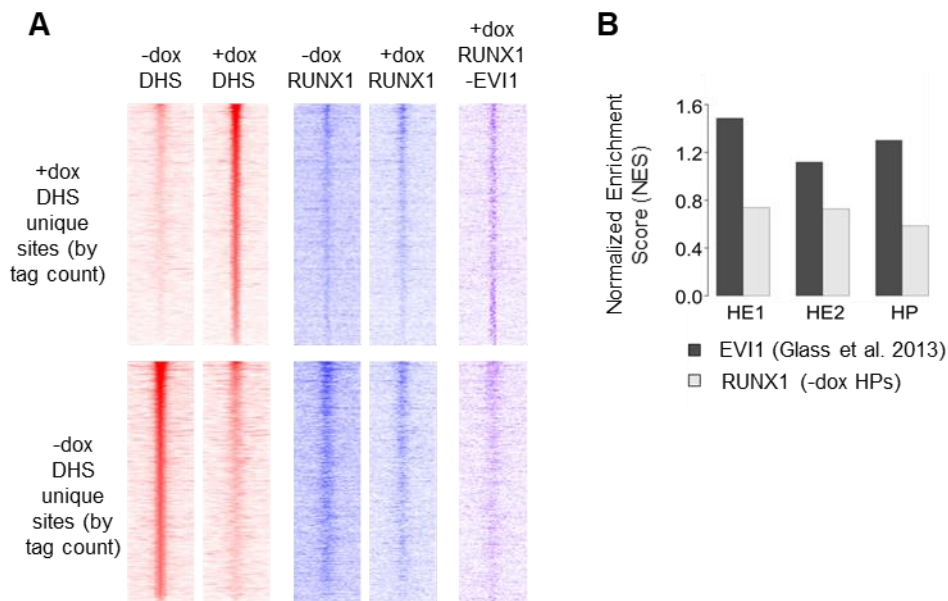

**Supplementary Figure 6 Changes to chromatin organisation and gene expression are modulated by RUNX1 and RUNX1-EVI1 binding.** (A) RUNX1 and RUNX1-EVI1 ChIP peaks were plotted alongside HP - or +dox unique DNaseI-seq peaks, which had been ranked by tag count and the density plotted across a 2kb window (B) Normalized Enrichment Scores (NES) from Gene Set Enrichment Analysis comparing gene expression changes after RUNX1-EVI1 induction in HE1, HE2 and HP cells to wild-type EVI1 targets from SKH1 cells<sup>2</sup> and RUNX1 targets from -dox cells. Genes that were upregulated after RUNX1-EVI1 induction were significantly enriched for EVI1 targets (FDR q-value < 0.0001 for HE1, HE2 and HP) but not RUNX1 targets (FDR q-value  $\approx$  1 for HE1, HE2 and HP)

## **Supplementary Methods**

### **Mouse RUNX1-EVI1 ESC generation**

RUNX1-EVI1 from the pME18s-RUNX1-EVI1 plasmid (a gift from Kinuko Mitani, Dokkyo Medical University, Japan) was cloned into the p2lox-targeting vector (a gift from Michael Kyba, University of Minnesota). A2lox ESCs (a gift from Michael Kyba) were transduced with 20 µg of p2lox-RUNX-EVI1 using the 4D-Nucleofector (Lonza) with the mouse ES program, with the P3 primary cell kit.

Individual colonies were expanded on mouse embryonic feeder cells in ES cell medium, comprising DMEM (Sigma D6546), 15% FCS (Sigma ES-009), 100 units/ml penicillin, 100 µg/ml streptomycin, 1 mM sodium pyruvate, 1mM L-glutamine, 0.15 mM monothioglycerol, 1x non-essential amino acids and 10<sup>3</sup> U/ml leukaemia inhibitory factor (ESGRO, Millipore) following 7 days of 300 µg/ml neomycin selection.

### **ESC Differentiation**

ESCs were passaged twice onto gelatine-coated tissue culture plastic without MEFs, on the second passage DMEM was substituted for IMDM (Sigma I3390). Cells were then plated into bacterial-grade dishes at a density of 2.5x10<sup>4</sup> cells/ml with IMDM, 15% FCS (Gibco), 100 units/ml penicillin, 100 µg/ml streptomycin, 1 mM sodium pyruvate, 1mM L-glutamine, 0.15 mM monothioglycerol, 0.18 mg/ml hTransferrin (Roche), 50 µg/ml ascorbic acid. After 3.25 days the resulting embryoid bodies were dispersed using TrypLE express (Gibco) to single cells and FLK1+ cells were purified by magnetic cells sorting, using biotin-conjugated CD309 antibody (eBioscience), anti-biotin microbeads (Miltenyi Biotec) and LS columns (Miltenyi Biotec). These FLK1+ cells were then cultured in gelatin-coated flasks – 1.4x10<sup>6</sup> cells in a T150 flask – in IMDM, 10% FCS (Gibco), 20% D4T condition media, 100 units/ml penicillin, 100 µg/ml streptomycin, 1 mM sodium pyruvate, 1mM L-glutamine, 0.45 mM monothioglycerol, 0.18 mg/ml hTransferrin (Roche), 25 µg/ml ascorbic acid, 5 ng/ml mVEGF (Peprotech) and 10 ng/ml mL-6 (Peprotech). After 1 day 0.5 µg/ml doxycycline was added where appropriate and cells were cultured in the same media for a further 18 hours prior to sorting for HE and HPs, or a further 42 hours for maturation in liquid/blast culture.

### **Cell cycle and apoptosis analysis**

For cell cycle analysis cells were fixed in ice-cold 70% ethanol added dropwise with vortexing and kept at 4°C overnight. Cells were rehydrated in PBS, treated with 100 µg/ml RNase A at 37°C for 20 minutes, then resuspended in PBS containing 10 µg/ml 7-Aminoactinomycin D (7-AAD, Sigma). For G<sub>0</sub> analysis unfixed cells were incubated with 10 µg/ml Hoechst 33342 (Sigma) at 37°C for 45 minutes, then Pyronin Y (Sigma) was added to 5µg/ml for a further 15 minutes at 37°C at which point tubes were transferred onto ice. For apoptosis analysis cells were suspended in Annexin V and propidium iodide (eBioscience) at the concentrations indicated by the manufacturer for 15 minutes at room temperature. All samples were then analysed on a Cyan ADP flow cytometer (Beckman Coulter) with data analysis using Summit or FlowJo software.



## Colony forming unit (CFU) assays

HP cells were taken as above and  $5 \times 10^3$  cells were seeded in 1 ml MethoCult (M3434 STEMCELL Technologies) per dish, where appropriate 0.5  $\mu\text{g/ml}$  doxycycline was also added. These were done in duplicate and then counted after 10 days.

## Western blotting

20  $\mu\text{g}$  of protein extracts in Laemmli buffer were run on a 4-20% gradient pre-cast gel (Bio-Rad) and transferred to nitrocellulose using Turbo transfer packs (Bio-Rad). Membranes were blocked using 5% milk, then 1:1000 EVI1 antibody (2593, Cell Signalling Technologies) was incubated overnight at 4°C in 5% milk. HRP-conjugated anti-rabbit antibody (Cell Signalling Technologies) was incubated for 1 hour at room temperature, enhanced chemiluminescent reagent (Amersham) applied and blot was visualised using a Gel Doc system (Bio-Rad). For loading controls membranes were stripped using Restore stripping buffer (Thermo Scientific) and GAPDH (ab8245, Abcam) was applied.

## Gene expression analysis

RNA was isolated from sorted cells using the NucleoSpin RNA kit (Macherey-Nagel). RNA-seq libraries were prepared from two biological replicates using the True-Seq stranded total RNA kit (Illumina) and sequenced paired-end in a pool of 12 indexed libraries using a Next-Seq 500/550 high output kit v2 150 cycles (Illumina) at the Genomics Birmingham sequencing facility. cDNA was also generated for validation from RNA using Superscript II (Invitrogen) and qRT-PCR performed using SYBR green PCR master mix (Applied Biosystems) and primers indicated in the table below, then run on a StepOne qPCR machine. All kits were used according to the manufacturer's instructions.

| Gene               | Forward primer           | Reverse primer           |
|--------------------|--------------------------|--------------------------|
| <i>Cdkn1c</i>      | CTGAAGGACCAGCCTCTCTC     | AAGAAGTCGTTTCGCATTGGC    |
| <i>Csf1r</i>       | CTTTGGTCTGGGCAAAGAAGAT   | CAGGGCCTCCTTCTCATCAG     |
| <i>Fli1</i>        | TCGTGAGGACTGGTCTGTATGG   | GCTGTTGTTCGCACCTCAGTTAC  |
| <i>Gapdh</i>       | ACCTGCCAAGTATGATGACATCA  | GGTCCTCAGTGTAGCCCAAGAT   |
| <i>Meis1</i>       | GACGATGATGACCCTGATAAG    | GTTCACTTGAAGGATGGTAAGTCC |
| <i>Mpo</i>         | TTTGCCTGCTCTTAACATGCA    | GGAAGCCCACAAAAGCGTC      |
| <i>Nfe2</i>        | GTTGTTGGCACAGTATCCGC     | TCTTGCACAGTTTTGGGCT      |
| <i>RUNT domain</i> | AACAAGACCCTGCCCATCGCTTTC | CATCACAGTGACCAGAGTGCCAT  |
| <i>mRunx1</i>      | AGCGGTAGAGGCAAGAGCTTC    | CGGATTTGTAAAGACGGTGATG   |
| <i>RUNX1-EVI1</i>  | CCACAGAGCCATCAAATCA      | TCTGGCATTCTTCCAAAGG      |
| <i>Spi1</i>        | CCATAGCGATCACTACTGGGATTT | TGTGAAGTGTTCTCAGGGAAGT   |

## DNaseI-seq

DNaseI was performed as previously described<sup>3</sup>.  $3 \times 10^5$  sorted cells were added directly to DNaseI (Worthington Biochemical Corporation) used between 6 and 13 U/ml for 3 minutes at 22°C. The reaction was terminated by addition of SDS to 0.5% and cell lysates treated with 0.5 mg/ml proteinase K overnight at 45°C overnight then 0.2 mg/ml RNaseA for 1 hour at 37°C. DNA was isolated by phenol/chloroform extraction and level of DNaseI digestion was assessed using qRT-PCR for the active TBP promoter compared to an inactive region of chromosome 1 to ensure comparable digestion points were used. DNaseI fragments were size selected on an agarose gel to between 50 and 250 bp then used

to generate a library using the KAPA hyper prep kit, according to the manufacturer's instructions. These were then further size selected to obtain fragments between 200 and 300 bp and sequenced single-end in a pool of 12 indexed libraries using a Next-Seq 500/550 high output kit v2 75 cycles (Illumina) at the Genomics Birmingham sequencing facility.

### **ChIP-seq**

KIT+ floating progenitor cells were purified by taking cells in the media and loosened by one wash in MACS buffer, and using biotin-conjugated CD117 antibody (eBioscience) for magnetic cell sorting, then crosslinked for 45 minutes at room temperature in PBS with 0.83 mg/ml Di(N-succinimidyl) glutarate (Sigma), followed by a second crosslink for 10 minutes at room temperature in PBS with 1% formaldehyde (Pierce) which was quenched by adding 1/10<sup>th</sup> volume of 2M glycine. Nuclei were prepared as ref then sonicated for 8 cycles of 30s on/30s off using a Picoruptor (Diagenode), in 25 mM Tris 1 M pH 8.0, 150 mM NaCl, 2 mM EDTA pH 8.0, 1% TritonX-100 and 0.5% SDS. The chromatin fragments were diluted with 2 volumes of buffer containing 25 mM Tris pH 8.0, 150mM NaCl, 2 mM EDTA pH 8.0, 1% TritonX-100, 7.5% glycerol. Immunoprecipitation was carried out overnight at 4°C using 2 µg of RUNX1 (ab23980, Abcam) or EVI1 (2593, Cell Signalling Technologies) antibody coupled to 15 µg Dynabeads Protein G (Invitrogen) per 2 x 10<sup>6</sup> cells. The beads were then washed using low salt, high salt, LiCl and TE/NaCl buffers and eluted, the resulting material was incubated overnight with 0.25 mg/ml proteinase K. DNA from 2-3 immunoprecipitations was pooled and extracted using Ampure beads (Beckman Coulter) and ChIP quality was assessed using qRT-PCR. ChIP libraries were generated and sequenced as for DNaseI using the KAPA hyper prep kit, except libraries were size selected to obtain fragments between 150 and 450 bp.

### **RNA-seq analysis**

Raw paired-end sequencing data were processed to remove low quality sequences and adaptors with Trimmomatic v0.32.<sup>4</sup> The processed reads were then aligned to the mouse genome (version mm10) using Hisat2 v2.1.0<sup>5</sup> with default parameters. Gene expression was measured as Fragments Per Kilobase of transcript per Million mapped reads (FPKM) values with Stringtie v1.3.3<sup>6</sup> using gene models from RefSeq as the reference transcriptome. Only genes that had an FPKM greater than 1 in at least one sample were considered expressed and were used in downstream analyses. FPKM values were normalized using quantile normalization implemented in the Limma package v3.26.9<sup>7</sup> in R v3.2.3 and further log<sub>2</sub>-transformed as log<sub>2</sub>(FPKM + 1). Differential gene expression analysis was carried out by fitting a linear model to the data with Limma. A gene was considered to be differentially expressed if it had a fold-change of at least 2 between experimental conditions and a Benjamini-Hochberg adjusted p-value < 0.05.

Gene Ontology (GO) biological process and Kyoto Encyclopaedia of Genes and Genomes (KEGG) pathway enrichment analysis was carried out on the sets of up and downregulated genes using the ClueGO plugin v2.5.0<sup>8</sup> in Cytoscape v3.6.1<sup>9</sup> using a right-sided hypergeometric test. The resulting p-values were corrected for multiple testing using the Benjamini-Hochberg method. A GO term or KEGG pathway was deemed to be significantly enriched if the adjusted p-value was < 0.05. Gene Set Enrichment Analysis was conducted using the GSEA software v2.2.4 from the Broad institute.<sup>10</sup>

Clustering of gene expression data was carried out by first calculating pair-wise Pearson correlations of the log<sub>2</sub>-transformed FPKM values for each pair of samples in R v3.2.2. The resulting correlation

values were then converted to a distance, which was calculated as  $1 - \text{pearson correlation}$ . These were then hierarchically clustered using average linkage clustering and plotted as a heatmap in R.

### **DNaseI-seq analysis**

Raw single-end reads from DNaseI-seq experiments were processed with Trimmomatic v0.32. The processed reads were aligned to the mouse genome (version mm10) using Bowtie2 v2.2.3<sup>11</sup> with the option `--very-sensitive-local`. The resulting alignments were filtered to remove potentially PCR duplicated reads using the MarkDuplicates function in Picard v2.10.5 (<http://broadinstitute.github.io/picard>). Peaks corresponding to regions of open chromatin were identified using MACS2 v2.1.1<sup>12</sup> with the options `-g mm --keep-dup all -B --trackline --nomodel --shift -100 --extsize 200`. These were then filtered against the mm10 blacklist and the simple repeats track from the UCSC table browser<sup>13</sup> to remove peaks that are potential artefacts from the data. Peaks were annotated to the nearest gene based on the transcriptional start site (TSS) using the `annotatePeaks` function in Homer v4.9.1,<sup>14</sup> and further sub-divided as either a promoter or distal element. A peak was considered to be in the promoter of a gene if it was within 1.5kb of the TSS and as a distal element otherwise.

To identify regions with differential chromatin accessibility, a peak union was first created between the pair of samples being analysed. A peak union was created by identifying peaks that had summit positions within 400bp of each other and merging them into a single peak. A new summit position was then defined for these peaks as the mid-point between the original summit positions. This average summit position was then used in all further down-stream analysis. The read density within a 200bp window centered on the peak summit was retrieved from the bedGraph files produced by MACS2 using the `annotatePeaks` function in Homer. Read counts were normalized as counts per million (CPM) in R, and further  $\log_2$ -transformed with a pseudocount of 1 being added to each of the normalized read counts prior to transformation. A peak was considered to be differentially accessible if it had a fold-difference greater than 2 between samples.

Read density plots were created by first ranking peaks according to fold-difference. The density in a 2kb window centered on the peak summit was then retrieved from the bedGraph files using the `annotatePeaks` function in Homer with the options `-size 2000 -hist 10 -ghist`. This was then plotted as a heatmap in Java TreeView v1.1.<sup>15</sup>

### **ChIP-seq analysis**

Sequence reads from ChIP-seq experiments were pre-processed, aligned to the mouse genome and de-duplicated as described above for the DNaseI-seq data. Peaks were identified using MACS v2.1.1 with the options `-g mm --keep-dup all -B --trackline`. Only peaks that were found within open chromatin regions (as determined by the DNaseI-seq data) were retained for further analysis. Peaks that were specific to an experimental condition or that were shared between conditions were identified using the `intersect` function in bedtools v2.25.0.<sup>16</sup> The distance between RUNX1 and RUNX1-EVI1 binding sites was measured using bedtools `closest`. Read density plots for ChIP-seq data were created as described above for the DNaseI-seq data.

## Generation of genome browser tracks

Coverage tracks for DNase-seq and ChIP-seq data were generated using the bamCoverage function in DeepTools v3.0.1.<sup>17</sup> Tracks were normalized as Counts Per Million (CPM) and multiplied by a scaling factor of 10 using the parameters --normalizeUsing CPM --scaleFactor 10. The resulting coverage tracks were then plotted using the UCSC Genome Browser.<sup>18</sup>

## Motif enrichment analysis

A de-novo motif search was carried out in each of the specific and shared groups of DHSs and ChIP-seq peaks using the findMotifsGenome function in Homer v4.9.1 with the options -size 200 -noknown.

## References

1. Loke J, Assi SA, Imperato MR, et al. RUNX1-ETO and RUNX1-EVI1 Differentially Reprogram the Chromatin Landscape in t(8;21) and t(3;21) AML. *Cell Rep.* 2017;19(8):1654-1668.
2. Glass C, Wuertzer C, Cui X, et al. Global Identification of EVI1 Target Genes in Acute Myeloid Leukemia. *PLoS One.* 2013;8(6):e67134.
3. Bert AG, Johnson BV, Baxter EW, Cockerill PN. A Modular Enhancer Is Differentially Regulated by GATA and NFAT Elements That Direct Different Tissue-Specific Patterns of Nucleosome Positioning and Inducible Chromatin Remodeling. *Molecular and Cellular Biology.* 2007;27(8):2870-2885.
4. Bolger AM, Lohse M, Usadel B. Trimmomatic: a flexible trimmer for Illumina sequence data. *Bioinformatics.* 2014;30(15):2114-2120.
5. Kim D, Langmead B, Salzberg SL. HISAT: a fast spliced aligner with low memory requirements. *Nature Methods.* 2015;12:357.
6. Pertea M, Pertea GM, Antonescu CM, Chang T-C, Mendell JT, Salzberg SL. StringTie enables improved reconstruction of a transcriptome from RNA-seq reads. *Nature Biotechnology.* 2015;33:290.
7. Ritchie ME, Phipson B, Wu D, et al. limma powers differential expression analyses for RNA-seq and microarray studies. *Nucleic Acids Research.* 2015;43(7):e47-e47.
8. Bindea G, Mlecnik B, Hackl H, et al. ClueGO: a Cytoscape plug-in to decipher functionally grouped gene ontology and pathway annotation networks. *Bioinformatics.* 2009;25(8):1091-1093.
9. Shannon P, Markiel A, Ozier O, et al. Cytoscape: A Software Environment for Integrated Models of Biomolecular Interaction Networks. *Genome Research.* 2003;13(11):2498-2504.
10. Subramanian A, Tamayo P, Mootha VK, et al. Gene set enrichment analysis: A knowledge-based approach for interpreting genome-wide expression profiles. *Proc Natl Acad Sci U S A.* 2005;102(43):15545-15550.
11. Langmead B, Salzberg SL. Fast gapped-read alignment with Bowtie 2. *Nature Methods.* 2012;9(4):357-359.
12. Zhang Y, Liu T, Meyer CA, et al. Model-based Analysis of ChIP-Seq (MACS). *Genome Biology.* 2008;9(9):R137.
13. Karolchik D, Hinrichs AS, Furey TS, et al. The UCSC Table Browser data retrieval tool. *Nucleic Acids Research.* 2004;32(suppl\_1):D493-D496.
14. Heinz S, Benner C, Spann N, et al. Simple Combinations of Lineage-Determining Transcription Factors Prime cis-Regulatory Elements Required for Macrophage and B Cell Identities. *Mol Cell.* 2010;38(4):576-589.

15. Saldanha AJ. Java Treeview—extensible visualization of microarray data. *Bioinformatics*. 2004;20(17):3246-3248.
16. Quinlan AR, Hall IM. BEDTools: a flexible suite of utilities for comparing genomic features. *Bioinformatics*. 2010;26(6):841-842.
17. Ramírez F, Ryan DP, Grüning B, et al. deepTools2: a next generation web server for deep-sequencing data analysis. *Nucleic Acids Research*. 2016;44(W1):W160-W165.
18. Kent WJ, Sugnet CW, Furey TS, et al. The Human Genome Browser at UCSC. *Genome Research*. 2002;12(6):996-1006.

**Supplementary Table 1** Genes de-regulated in HE1 cells, FC given as +dox/-dox

| Gene_ID    | logFC   | Pvalue   | FDR      |
|------------|---------|----------|----------|
| Hprt       | 3.48367 | 2.01E-39 | 2.28E-35 |
| Nts        | 2.88441 | 1.37E-27 | 7.79E-24 |
| Gja5       | 2.81504 | 2.33E-26 | 8.82E-23 |
| Ltb        | 2.57122 | 2.87E-22 | 8.16E-19 |
| St6galnac2 | 2.54343 | 7.97E-22 | 1.81E-18 |
| Ctsh       | 2.49794 | 4.14E-21 | 7.85E-18 |
| Mall       | 2.48852 | 5.81E-21 | 8.83E-18 |
| Spint2     | 2.48663 | 6.22E-21 | 8.83E-18 |
| Lgr6       | 2.41792 | 7.01E-20 | 8.86E-17 |
| Tm4sf1     | 2.34104 | 9.77E-19 | 1.01E-15 |
| Prom1      | 2.31998 | 1.98E-18 | 1.88E-15 |
| Mogat2     | 2.31517 | 2.33E-18 | 2.03E-15 |
| Smtnl1     | 2.30552 | 3.21E-18 | 2.60E-15 |
| Sema7a     | 2.22753 | 4.10E-17 | 2.91E-14 |
| Hid1       | 2.1488  | 4.94E-16 | 3.30E-13 |
| Tmem255b   | 2.09002 | 2.99E-15 | 1.70E-12 |
| Pdzk1ip1   | 2.07694 | 4.43E-15 | 2.40E-12 |
| Lsr        | 2.05551 | 8.40E-15 | 4.34E-12 |
| Cxcr4      | 2.0421  | 1.25E-14 | 6.18E-12 |
| Spint1     | 2.01859 | 2.50E-14 | 1.09E-11 |
| Slco4a1    | 1.99279 | 5.28E-14 | 2.22E-11 |
| Slc12a2    | 1.96338 | 1.23E-13 | 4.98E-11 |
| Marveld2   | 1.94956 | 1.81E-13 | 7.11E-11 |
| Etv4       | 1.94684 | 1.96E-13 | 7.42E-11 |
| Dag1       | 1.93245 | 2.94E-13 | 1.08E-10 |
| Serpine1   | 1.86076 | 2.11E-12 | 7.06E-10 |
| Dll4       | 1.83283 | 4.47E-12 | 1.41E-09 |
| Zfp185     | 1.80966 | 8.26E-12 | 2.53E-09 |
| Vegfc      | 1.75196 | 3.68E-11 | 1.10E-08 |
| Chrb1      | 1.721   | 8.06E-11 | 2.23E-08 |
| Ivl        | 1.69912 | 1.39E-10 | 3.76E-08 |
| Mal        | 1.69109 | 1.69E-10 | 4.38E-08 |
| Stmn2      | 1.68639 | 1.90E-10 | 4.81E-08 |
| Tnfrsf23   | 1.66765 | 3.01E-10 | 7.13E-08 |
| Bcam       | 1.65309 | 4.28E-10 | 9.93E-08 |
| Nedd9      | 1.65076 | 4.53E-10 | 1.03E-07 |
| Pdgfa      | 1.65008 | 4.61E-10 | 1.03E-07 |
| Nodal      | 1.64585 | 5.10E-10 | 1.11E-07 |
| Pdlim2     | 1.62747 | 7.92E-10 | 1.70E-07 |
| Dusp9      | 1.62466 | 8.46E-10 | 1.78E-07 |
| Spon2      | 1.61928 | 9.61E-10 | 1.99E-07 |

|          |         |          |          |
|----------|---------|----------|----------|
| Arhgap8  | 1.61171 | 1.15E-09 | 2.33E-07 |
| Chmp4c   | 1.60481 | 1.35E-09 | 2.66E-07 |
| Osmr     | 1.60466 | 1.36E-09 | 2.66E-07 |
| Fam46b   | 1.59965 | 1.53E-09 | 2.94E-07 |
| Ocln     | 1.58781 | 2.01E-09 | 3.81E-07 |
| Cdkn1c   | 1.58633 | 2.08E-09 | 3.88E-07 |
| Egfr     | 1.58536 | 2.13E-09 | 3.90E-07 |
| Rdh10    | 1.57232 | 2.88E-09 | 5.03E-07 |
| Dsp      | 1.56616 | 3.31E-09 | 5.62E-07 |
| Sema3g   | 1.56102 | 3.73E-09 | 6.23E-07 |
| Nmnat2   | 1.55785 | 4.01E-09 | 6.50E-07 |
| Slc45a4  | 1.5536  | 4.41E-09 | 7.07E-07 |
| Hba-a1   | 1.54256 | 5.67E-09 | 8.95E-07 |
| Dusp5    | 1.54054 | 5.94E-09 | 9.16E-07 |
| Gprc5a   | 1.53989 | 6.02E-09 | 9.16E-07 |
| Rgs5     | 1.53974 | 6.04E-09 | 9.16E-07 |
| Fbp1     | 1.53286 | 7.06E-09 | 1.05E-06 |
| Crif1    | 1.53117 | 7.33E-09 | 1.08E-06 |
| Tmem154  | 1.52204 | 8.99E-09 | 1.29E-06 |
| Ltbp4    | 1.51672 | 1.01E-08 | 1.44E-06 |
| Synpo    | 1.50983 | 1.18E-08 | 1.65E-06 |
| Fam110c  | 1.50381 | 1.35E-08 | 1.87E-06 |
| Wnt11    | 1.5012  | 1.43E-08 | 1.95E-06 |
| Snurf    | 1.49841 | 1.52E-08 | 2.05E-06 |
| Prnd     | 1.49148 | 1.77E-08 | 2.36E-06 |
| Hey1     | 1.48611 | 1.99E-08 | 2.63E-06 |
| Slc16a9  | 1.48018 | 2.26E-08 | 2.92E-06 |
| Cdkn2b   | 1.4716  | 2.72E-08 | 3.48E-06 |
| Etv5     | 1.45751 | 3.69E-08 | 4.55E-06 |
| Edn1     | 1.4552  | 3.87E-08 | 4.73E-06 |
| Ubd      | 1.45464 | 3.92E-08 | 4.74E-06 |
| Galnt3   | 1.44379 | 4.94E-08 | 5.91E-06 |
| Sorcs2   | 1.44286 | 5.04E-08 | 5.97E-06 |
| Krt18    | 1.43673 | 5.74E-08 | 6.52E-06 |
| Col11a1  | 1.42411 | 7.49E-08 | 8.42E-06 |
| Eps8l2   | 1.41206 | 9.63E-08 | 1.07E-05 |
| Vwf      | 1.40522 | 1.11E-07 | 1.22E-05 |
| Lig2     | 1.39486 | 1.37E-07 | 1.49E-05 |
| Serping1 | 1.37386 | 2.11E-07 | 2.24E-05 |
| Fhl2     | 1.37341 | 2.13E-07 | 2.24E-05 |
| Ptgs2    | 1.36321 | 2.62E-07 | 2.65E-05 |
| Pla2g7   | 1.36165 | 2.70E-07 | 2.71E-05 |
| Cxcl14   | 1.3576  | 2.93E-07 | 2.92E-05 |
| Ifitm1   | 1.35506 | 3.08E-07 | 3.04E-05 |
| Vgf      | 1.35362 | 3.17E-07 | 3.11E-05 |
| Ano1     | 1.35013 | 3.40E-07 | 3.30E-05 |
| Dmd      | 1.33454 | 4.63E-07 | 4.39E-05 |
| Slc22a18 | 1.33081 | 4.98E-07 | 4.64E-05 |
| Gadd45b  | 1.32909 | 5.16E-07 | 4.76E-05 |
| Ethe1    | 1.30259 | 8.64E-07 | 7.79E-05 |
| Adm      | 1.29232 | 1.05E-06 | 9.34E-05 |
| Nqo1     | 1.29136 | 1.07E-06 | 9.44E-05 |
| Arc      | 1.28864 | 1.13E-06 | 9.87E-05 |
| Mt2      | 1.28743 | 1.16E-06 | 0.0001   |
| Acta1    | 1.28541 | 1.20E-06 | 0.0001   |
| Rps16    | 1.28081 | 1.31E-06 | 0.00011  |
| Stk26    | 1.27856 | 1.37E-06 | 0.00012  |
| Gpc1     | 1.27695 | 1.41E-06 | 0.00012  |

|               |         |          |         |
|---------------|---------|----------|---------|
| Cnksr1        | 1.27666 | 1.42E-06 | 0.00012 |
| Gsn           | 1.27622 | 1.43E-06 | 0.00012 |
| Ezr           | 1.26054 | 1.92E-06 | 0.00016 |
| Prkcd         | 1.24966 | 2.35E-06 | 0.00018 |
| Aes           | 1.24608 | 2.51E-06 | 0.00019 |
| Mttr7         | 1.24175 | 2.72E-06 | 0.00021 |
| Tpd52         | 1.23751 | 2.94E-06 | 0.00022 |
| Myl9          | 1.23731 | 2.96E-06 | 0.00022 |
| Egr1          | 1.23459 | 3.11E-06 | 0.00023 |
| Cyb561        | 1.23014 | 3.37E-06 | 0.00025 |
| Cd68          | 1.22672 | 3.59E-06 | 0.00026 |
| Slc35g3       | 1.22653 | 3.60E-06 | 0.00026 |
| Ncs1          | 1.22562 | 3.66E-06 | 0.00026 |
| Prkcdbp       | 1.22072 | 4.00E-06 | 0.00028 |
| Gm4070        | 1.21829 | 4.18E-06 | 0.00029 |
| Patj          | 1.21813 | 4.20E-06 | 0.00029 |
| Clu           | 1.21781 | 4.22E-06 | 0.00029 |
| Esrp2         | 1.21349 | 4.56E-06 | 0.00031 |
| Kank1         | 1.21346 | 4.56E-06 | 0.00031 |
| Cyr61         | 1.21247 | 4.65E-06 | 0.00032 |
| Pramef12      | 1.21224 | 4.67E-06 | 0.00032 |
| Tspan8        | 1.21133 | 4.74E-06 | 0.00032 |
| Apoa-ps       | 1.21108 | 4.77E-06 | 0.00032 |
| Eml2          | 1.20963 | 4.89E-06 | 0.00033 |
| Rnd1          | 1.20914 | 4.94E-06 | 0.00033 |
| Ablim1        | 1.2083  | 5.01E-06 | 0.00033 |
| Tmem254c      | 1.20775 | 5.06E-06 | 0.00033 |
| Hbegf         | 1.20567 | 5.25E-06 | 0.00034 |
| Fblim1        | 1.19849 | 5.97E-06 | 0.00038 |
| Emp2          | 1.19538 | 6.32E-06 | 0.0004  |
| Jag1          | 1.19239 | 6.66E-06 | 0.00042 |
| Mmp23         | 1.18145 | 8.08E-06 | 0.0005  |
| Fam107a       | 1.17868 | 8.49E-06 | 0.00052 |
| Ssh3          | 1.1786  | 8.50E-06 | 0.00052 |
| Rhobtb2       | 1.17587 | 8.92E-06 | 0.00055 |
| Unc13b        | 1.17278 | 9.41E-06 | 0.00057 |
| Timd2         | 1.17114 | 9.69E-06 | 0.00058 |
| Fbln2         | 1.16841 | 1.02E-05 | 0.0006  |
| Hoxd1         | 1.1683  | 1.02E-05 | 0.0006  |
| Laptm5        | 1.16793 | 1.02E-05 | 0.0006  |
| Aph1b         | 1.16738 | 1.03E-05 | 0.00061 |
| Bmx           | 1.1627  | 1.12E-05 | 0.00064 |
| Krt19         | 1.15173 | 1.36E-05 | 0.00076 |
| Npr3          | 1.15164 | 1.36E-05 | 0.00076 |
| Sh3bgrl2      | 1.14925 | 1.42E-05 | 0.00079 |
| 2200002D01Rik | 1.14637 | 1.49E-05 | 0.00082 |
| Pfkfb3        | 1.14013 | 1.66E-05 | 0.0009  |
| Chrna7        | 1.13263 | 1.88E-05 | 0.00101 |
| Msrb3         | 1.12848 | 2.02E-05 | 0.00108 |
| Tnfrsf26      | 1.12744 | 2.05E-05 | 0.00109 |
| Pdgfd         | 1.12624 | 2.10E-05 | 0.0011  |
| Ctgf          | 1.12624 | 2.10E-05 | 0.0011  |
| F10           | 1.12321 | 2.20E-05 | 0.00114 |
| Fmnl1         | 1.11642 | 2.47E-05 | 0.00126 |
| Tec           | 1.11376 | 2.58E-05 | 0.0013  |
| Gulp1         | 1.10948 | 2.77E-05 | 0.00138 |
| Nrep          | 1.10733 | 2.88E-05 | 0.00141 |
| Fgf15         | 1.09696 | 3.41E-05 | 0.00165 |

|           |         |          |         |
|-----------|---------|----------|---------|
| Itpr3     | 1.0967  | 3.43E-05 | 0.00165 |
| Fam124b   | 1.09461 | 3.55E-05 | 0.0017  |
| Slc12a7   | 1.09221 | 3.69E-05 | 0.00176 |
| Igfbp3    | 1.0922  | 3.69E-05 | 0.00176 |
| Dhh       | 1.09043 | 3.80E-05 | 0.0018  |
| Coro1a    | 1.08375 | 4.24E-05 | 0.00199 |
| Sp110     | 1.08235 | 4.34E-05 | 0.00203 |
| Sel1l3    | 1.08205 | 4.36E-05 | 0.00203 |
| Fos       | 1.07752 | 4.69E-05 | 0.00217 |
| Tinagl1   | 1.07234 | 5.10E-05 | 0.00233 |
| Map6      | 1.07221 | 5.11E-05 | 0.00233 |
| Anxa1     | 1.07049 | 5.26E-05 | 0.00238 |
| Hlx       | 1.07034 | 5.27E-05 | 0.00238 |
| Cyp1a1    | 1.06554 | 5.69E-05 | 0.00253 |
| Gm20594   | 1.06345 | 5.88E-05 | 0.00259 |
| Hhex      | 1.06253 | 5.97E-05 | 0.00262 |
| Rassf9    | 1.0624  | 5.98E-05 | 0.00262 |
| Capn1     | 1.06203 | 6.02E-05 | 0.00262 |
| Pfkfb3    | 1.06169 | 6.05E-05 | 0.00262 |
| Wfdc2     | 1.06136 | 6.08E-05 | 0.00262 |
| Ptp4a3    | 1.05822 | 6.40E-05 | 0.00272 |
| Plpp2     | 1.05695 | 6.53E-05 | 0.00276 |
| Spi1      | 1.05681 | 6.54E-05 | 0.00276 |
| Arhgd1g   | 1.05282 | 6.97E-05 | 0.00293 |
| Fzd6      | 1.05007 | 7.28E-05 | 0.00304 |
| Cpeb1     | 1.04998 | 7.29E-05 | 0.00304 |
| P4ha3     | 1.03644 | 9.03E-05 | 0.0037  |
| Tnfrsf12a | 1.03591 | 9.10E-05 | 0.00372 |
| Ccdc184   | 1.03251 | 9.60E-05 | 0.00387 |
| A4galt    | 1.02862 | 0.0001   | 0.00409 |
| Hacd4     | 1.02818 | 0.0001   | 0.0041  |
| Aqp11     | 1.02813 | 0.0001   | 0.0041  |
| Ctse      | 1.02786 | 0.0001   | 0.0041  |
| Crym      | 1.0274  | 0.0001   | 0.00411 |
| Slc9a3r1  | 1.02034 | 0.00012  | 0.00451 |
| Pde3b     | 1.01993 | 0.00012  | 0.00451 |
| Ccdc60    | 1.01876 | 0.00012  | 0.00456 |
| Jag2      | 1.01661 | 0.00012  | 0.00467 |
| Tcf7      | 1.01659 | 0.00012  | 0.00467 |
| Tmc7      | 1.01619 | 0.00012  | 0.00467 |
| Sprr2a3   | 1.0082  | 0.00014  | 0.00524 |
| Grb7      | 1.00772 | 0.00014  | 0.00525 |
| Sgms2     | 1.00761 | 0.00014  | 0.00525 |
| Sprr2a1   | 1.00605 | 0.00014  | 0.00533 |
| Pnp2      | 1.00599 | 0.00014  | 0.00533 |
| Tmem100   | 1.0055  | 0.00015  | 0.00534 |
| Tagln     | 1.0054  | 0.00015  | 0.00534 |
| Car8      | -1.0072 | 0.00014  | 0.00526 |
| Mmd       | -1.0085 | 0.00014  | 0.00523 |
| Slc22a23  | -1.0163 | 0.00012  | 0.00467 |
| Arl4d     | -1.0168 | 0.00012  | 0.00467 |
| Npl       | -1.0191 | 0.00012  | 0.00455 |
| Atp6v0e2  | -1.0198 | 0.00012  | 0.00451 |
| Myzap     | -1.0226 | 0.00011  | 0.00437 |
| Hoxb5     | -1.0241 | 0.00011  | 0.00428 |
| Rab3il1   | -1.0264 | 0.00011  | 0.00415 |
| Arhgef3   | -1.0266 | 0.00011  | 0.00415 |
| Gpm6b     | -1.0342 | 9.34E-05 | 0.00378 |



|               |         |          |         |
|---------------|---------|----------|---------|
| Lrp11         | -1.0344 | 9.32E-05 | 0.00378 |
| Pde4dip       | -1.0353 | 9.18E-05 | 0.00374 |
| Tet1          | -1.0377 | 8.85E-05 | 0.00364 |
| Hist1h2ao     | -1.0398 | 8.56E-05 | 0.00354 |
| Akr1c13       | -1.0492 | 7.38E-05 | 0.00306 |
| Postn         | -1.0514 | 7.14E-05 | 0.00299 |
| Lat           | -1.0597 | 6.25E-05 | 0.00267 |
| Hoxb2         | -1.0608 | 6.14E-05 | 0.00263 |
| Edil3         | -1.0617 | 6.06E-05 | 0.00262 |
| Hecw2         | -1.065  | 5.74E-05 | 0.00254 |
| Tbx3          | -1.0653 | 5.71E-05 | 0.00253 |
| Kank3         | -1.067  | 5.56E-05 | 0.00249 |
| Ednrb         | -1.0675 | 5.51E-05 | 0.00248 |
| Nlrc3         | -1.0679 | 5.48E-05 | 0.00247 |
| Trf           | -1.0732 | 5.03E-05 | 0.00231 |
| Plpp3         | -1.0796 | 4.54E-05 | 0.0021  |
| F2rl2         | -1.0863 | 4.07E-05 | 0.00192 |
| P2rx1         | -1.0988 | 3.31E-05 | 0.00161 |
| Tspan12       | -1.1026 | 3.11E-05 | 0.00152 |
| Slc38a10      | -1.1044 | 3.02E-05 | 0.00148 |
| Nefl          | -1.1082 | 2.83E-05 | 0.0014  |
| Ddah2         | -1.1095 | 2.77E-05 | 0.00138 |
| Acap1         | -1.1097 | 2.76E-05 | 0.00138 |
| Cnr2          | -1.113  | 2.62E-05 | 0.00132 |
| 1600002H07Rik | -1.1149 | 2.53E-05 | 0.00128 |
| Tubb3         | -1.1197 | 2.34E-05 | 0.0012  |
| Vcan          | -1.1203 | 2.31E-05 | 0.00119 |
| Mdm1          | -1.1209 | 2.29E-05 | 0.00118 |
| Kcnk9         | -1.1245 | 2.16E-05 | 0.00112 |
| Unc5c         | -1.1256 | 2.12E-05 | 0.00111 |
| Rnd2          | -1.1342 | 1.83E-05 | 0.00099 |
| Apcdd1        | -1.1371 | 1.74E-05 | 0.00094 |
| Bgn           | -1.1382 | 1.71E-05 | 0.00093 |
| Gas6          | -1.1415 | 1.62E-05 | 0.00089 |
| Adgrg3        | -1.1481 | 1.44E-05 | 0.0008  |
| Msh5          | -1.1512 | 1.37E-05 | 0.00077 |
| Peg3          | -1.1564 | 1.25E-05 | 0.00071 |
| Gpr182        | -1.1615 | 1.15E-05 | 0.00065 |
| Hapln1        | -1.1646 | 1.09E-05 | 0.00063 |
| Kcnk5         | -1.1649 | 1.08E-05 | 0.00063 |
| Cnnm2         | -1.167  | 1.04E-05 | 0.00061 |
| Lyve1         | -1.1702 | 9.85E-06 | 0.00059 |
| Ubash3b       | -1.1716 | 9.61E-06 | 0.00058 |
| B4gal7        | -1.173  | 9.38E-06 | 0.00057 |
| Sgk1          | -1.1825 | 7.93E-06 | 0.0005  |
| Slc29a1       | -1.1861 | 7.45E-06 | 0.00047 |
| Gem           | -1.2075 | 5.08E-06 | 0.00033 |
| Cyp26a1       | -1.2126 | 4.64E-06 | 0.00032 |
| Itga2b        | -1.2258 | 3.65E-06 | 0.00026 |
| Tfpi          | -1.2287 | 3.46E-06 | 0.00025 |
| Etv2          | -1.2458 | 2.53E-06 | 0.00019 |
| BC028528      | -1.246  | 2.52E-06 | 0.00019 |
| Gad2          | -1.2502 | 2.33E-06 | 0.00018 |
| Il4ra         | -1.2526 | 2.23E-06 | 0.00018 |
| Fmo1          | -1.2568 | 2.06E-06 | 0.00016 |
| Csgalnact1    | -1.2584 | 2.00E-06 | 0.00016 |
| Colec12       | -1.2602 | 1.93E-06 | 0.00016 |
| Igf1          | -1.2762 | 1.43E-06 | 0.00012 |

|               |         |          |          |
|---------------|---------|----------|----------|
| Prtg          | -1.2779 | 1.39E-06 | 0.00012  |
| Brinp1        | -1.2944 | 1.01E-06 | 9.05E-05 |
| Gm20716       | -1.3166 | 6.58E-07 | 5.98E-05 |
| Ddc           | -1.3175 | 6.47E-07 | 5.93E-05 |
| Dcaf12l1      | -1.3333 | 4.74E-07 | 4.45E-05 |
| Cped1         | -1.3377 | 4.35E-07 | 4.15E-05 |
| Mrc1          | -1.3393 | 4.22E-07 | 4.06E-05 |
| Capn5         | -1.3647 | 2.54E-07 | 2.60E-05 |
| Glp1r         | -1.3714 | 2.22E-07 | 2.29E-05 |
| Lgals9        | -1.3715 | 2.21E-07 | 2.29E-05 |
| Gstk1         | -1.3776 | 1.96E-07 | 2.10E-05 |
| Aqp8          | -1.4005 | 1.22E-07 | 1.34E-05 |
| Add3          | -1.4368 | 5.73E-08 | 6.52E-06 |
| Slc26a10      | -1.4378 | 5.61E-08 | 6.51E-06 |
| Lhx6          | -1.4385 | 5.53E-08 | 6.48E-06 |
| Vwa7          | -1.4604 | 3.46E-08 | 4.32E-06 |
| Slc30a3       | -1.4672 | 3.00E-08 | 3.78E-06 |
| Sapcd1        | -1.4841 | 2.07E-08 | 2.71E-06 |
| Akr1b8        | -1.5263 | 8.17E-09 | 1.19E-06 |
| Gm13889       | -1.5592 | 3.89E-09 | 6.40E-07 |
| F2rl3         | -1.57   | 3.03E-09 | 5.22E-07 |
| Slc1a2        | -1.5728 | 2.84E-09 | 5.03E-07 |
| Fzd10         | -1.5819 | 2.30E-09 | 4.16E-07 |
| Ptgs1         | -1.6719 | 2.71E-10 | 6.56E-08 |
| Ucn           | -1.6854 | 1.95E-10 | 4.82E-08 |
| Hba-a2        | -1.6911 | 1.69E-10 | 4.38E-08 |
| Mecom         | -1.7344 | 5.74E-11 | 1.63E-08 |
| Gstp2         | -1.7349 | 5.68E-11 | 1.63E-08 |
| Syt13         | -1.8462 | 3.13E-12 | 1.01E-09 |
| Samsn1        | -1.8657 | 1.85E-12 | 6.36E-10 |
| Gas7          | -1.8754 | 1.42E-12 | 5.04E-10 |
| Oit3          | -2.0194 | 2.44E-14 | 1.09E-11 |
| Atp6v0c       | -2.0323 | 1.67E-14 | 7.91E-12 |
| C330021F23Rik | -2.1226 | 1.11E-15 | 6.62E-13 |
| Aplnr         | -2.1424 | 6.01E-16 | 3.79E-13 |
| Has2          | -2.232  | 3.56E-17 | 2.70E-14 |
| Bmp2          | -2.3418 | 9.52E-19 | 1.01E-15 |

**Supplementary Table 2** Genes de-regulated in HE2 cells, FC given as +dox/-dox

| Gene_ID    | logFC   | Pvalue   | FDR      |
|------------|---------|----------|----------|
| Ctsh       | 4.44373 | 8.13E-09 | 2.36E-05 |
| Lars2      | 4.19568 | 0.01516  | 0.11841  |
| Il1b       | 4.17331 | 1.24E-09 | 1.43E-05 |
| Mogat2     | 3.97383 | 6.95E-09 | 2.36E-05 |
| Rps27      | 3.65407 | 0.03389  | 0.18086  |
| Smtnl1     | 3.52913 | 2.12E-08 | 4.10E-05 |
| Pdzk1ip1   | 3.45691 | 7.19E-07 | 0.00049  |
| Nts        | 3.35047 | 4.76E-05 | 0.00391  |
| Hist2h2aa2 | 3.32962 | 0.03962  | 0.19684  |
| Tspan8     | 3.30513 | 6.18E-07 | 0.00045  |
| Gja5       | 3.10766 | 8.10E-05 | 0.00545  |
| Coro1a     | 3.10765 | 1.89E-07 | 0.0002   |
| Ltb        | 3.09971 | 1.68E-08 | 3.88E-05 |
| Mt2        | 3.03835 | 9.02E-06 | 0.00141  |
| Ocln       | 2.98124 | 3.10E-06 | 0.00106  |
| Spr2a3     | 2.88479 | 1.28E-06 | 0.00067  |

|            |         |          |         |
|------------|---------|----------|---------|
| Pygl       | 2.85172 | 1.11E-06 | 0.00064 |
| Hprt       | 2.84424 | 9.72E-08 | 0.00015 |
| Cxcr4      | 2.78746 | 4.56E-06 | 0.00119 |
| Ptprc      | 2.74089 | 1.02E-06 | 0.00062 |
| Hid1       | 2.68791 | 2.10E-07 | 0.0002  |
| Naaa       | 2.6628  | 1.25E-07 | 0.00015 |
| Fam189a2   | 2.63411 | 2.97E-07 | 0.00026 |
| Stk26      | 2.62808 | 1.22E-07 | 0.00015 |
| Tm4sf1     | 2.58452 | 3.36E-05 | 0.00317 |
| Slc16a9    | 2.57013 | 1.28E-07 | 0.00015 |
| Marveld2   | 2.5667  | 3.36E-07 | 0.00028 |
| Ifitm1     | 2.56251 | 2.95E-06 | 0.00105 |
| Sema7a     | 2.52278 | 2.98E-06 | 0.00105 |
| Cd200r3    | 2.4883  | 9.59E-07 | 0.00062 |
| Prom1      | 2.47298 | 4.45E-06 | 0.00119 |
| Dmd        | 2.4339  | 3.60E-06 | 0.00116 |
| Serping1   | 2.30735 | 4.43E-07 | 0.00034 |
| Lsr        | 2.30679 | 2.22E-06 | 0.00097 |
| S100a4     | 2.27617 | 8.00E-06 | 0.00136 |
| Capg       | 2.25266 | 1.21E-06 | 0.00067 |
| Vegfc      | 2.25234 | 2.35E-06 | 0.00097 |
| Stmn2      | 2.23951 | 1.33E-06 | 0.00067 |
| Spr2a1     | 2.22924 | 1.29E-05 | 0.00172 |
| Bcam       | 2.22802 | 6.38E-06 | 0.00126 |
| St6galnac2 | 2.1837  | 4.33E-06 | 0.00119 |
| St8sia4    | 2.16673 | 0.0003   | 0.01201 |
| Trim47     | 2.16363 | 3.90E-06 | 0.00119 |
| Spr2a2     | 2.15113 | 8.80E-06 | 0.0014  |
| Sp100      | 2.143   | 2.25E-05 | 0.0025  |
| Steap4     | 2.13489 | 1.13E-05 | 0.00155 |
| Nedd9      | 2.13335 | 0.0012   | 0.0279  |
| Procr      | 2.13276 | 4.70E-06 | 0.00119 |
| Sema3g     | 2.13223 | 0.0001   | 0.00601 |
| Ivl        | 2.12918 | 7.30E-06 | 0.00133 |
| Matk       | 2.12733 | 1.42E-06 | 0.00068 |
| Anpep      | 2.1027  | 3.44E-05 | 0.00319 |
| Chrnbl     | 2.09891 | 2.99E-05 | 0.00301 |
| Tnfrsf23   | 2.09337 | 3.29E-05 | 0.00316 |
| Nos3       | 2.08564 | 9.10E-06 | 0.00141 |
| Entpd1     | 2.06776 | 3.29E-06 | 0.00109 |
| Mal        | 2.05833 | 7.93E-06 | 0.00136 |
| Lgr5       | 2.04033 | 4.59E-06 | 0.00119 |
| Ahrr       | 2.02233 | 1.72E-05 | 0.00208 |
| Edn1       | 2.0218  | 0.00175  | 0.03455 |
| Spint1     | 2.0197  | 5.27E-06 | 0.00122 |
| Setbp1     | 2.004   | 4.05E-06 | 0.00119 |
| Nr4a1      | 2.00023 | 1.00E-05 | 0.00149 |
| Dll4       | 2.00002 | 0.00018  | 0.00876 |
| Slc22a18   | 1.98825 | 1.03E-05 | 0.0015  |
| Mall       | 1.96646 | 2.02E-06 | 0.00093 |
| Fbp1       | 1.95733 | 5.21E-05 | 0.00411 |
| Tyrobp     | 1.95491 | 5.38E-06 | 0.00122 |
| Ssh3       | 1.94418 | 1.11E-05 | 0.00155 |
| Acer2      | 1.94398 | 8.48E-06 | 0.00138 |
| Pla2g7     | 1.93839 | 4.00E-05 | 0.00348 |
| Ptchd1     | 1.93431 | 0.00055  | 0.01704 |
| Tbxas1     | 1.92753 | 6.63E-06 | 0.00126 |
| Lgr6       | 1.92293 | 6.33E-06 | 0.00126 |

|               |         |          |         |
|---------------|---------|----------|---------|
| Arhgap8       | 1.92002 | 6.62E-06 | 0.00126 |
| Cdkn1c        | 1.91586 | 6.04E-06 | 0.00125 |
| Galnt3        | 1.90711 | 7.45E-06 | 0.00133 |
| Fam124b       | 1.89644 | 1.64E-05 | 0.00203 |
| Coro2a        | 1.88901 | 2.64E-06 | 0.00102 |
| Rhag          | 1.88724 | 2.87E-06 | 0.00105 |
| Ptpn18        | 1.87961 | 4.15E-06 | 0.00119 |
| Eps8l2        | 1.87479 | 5.04E-06 | 0.00119 |
| Nqo1          | 1.87479 | 4.82E-06 | 0.00119 |
| Tmem255b      | 1.87088 | 6.83E-06 | 0.00128 |
| Cyp7b1        | 1.86118 | 8.30E-06 | 0.00138 |
| Prex2         | 1.85425 | 0.00094  | 0.0239  |
| Grb7          | 1.83435 | 5.55E-05 | 0.00429 |
| Ret           | 1.82721 | 4.17E-06 | 0.00119 |
| Pde9a         | 1.81331 | 9.31E-06 | 0.00142 |
| Ube2l6        | 1.81294 | 1.12E-05 | 0.00155 |
| Cygb          | 1.8003  | 8.57E-06 | 0.00138 |
| Ms4a6d        | 1.78482 | 3.26E-05 | 0.00316 |
| Sh3bgrl2      | 1.77995 | 2.74E-05 | 0.00283 |
| Cldn5         | 1.77643 | 0.00087  | 0.02324 |
| Cd79b         | 1.77414 | 3.15E-05 | 0.00315 |
| Pik3ip1       | 1.771   | 1.51E-05 | 0.0019  |
| Mocos         | 1.76689 | 2.74E-05 | 0.00283 |
| Pdim2         | 1.76151 | 1.20E-05 | 0.00162 |
| Dusp6         | 1.7585  | 0.00019  | 0.00921 |
| Robo4         | 1.74168 | 0.00192  | 0.03596 |
| Adcy7         | 1.73542 | 9.69E-06 | 0.00146 |
| Pglyrp1       | 1.73181 | 3.30E-05 | 0.00316 |
| Sat1          | 1.73108 | 0.00011  | 0.00619 |
| F10           | 1.72071 | 0.00128  | 0.02918 |
| Mfsd6         | 1.71724 | 3.72E-05 | 0.00332 |
| Fam134b       | 1.71219 | 1.05E-05 | 0.00151 |
| Krt18         | 1.70863 | 7.40E-06 | 0.00133 |
| Lgals3        | 1.70582 | 1.68E-05 | 0.00205 |
| Serpib6a      | 1.70438 | 0.00017  | 0.00852 |
| Ctsj          | 1.70412 | 7.84E-06 | 0.00136 |
| Atp9a         | 1.7011  | 8.37E-05 | 0.00545 |
| Spn           | 1.69192 | 2.45E-05 | 0.00265 |
| Arhgef6       | 1.68521 | 1.59E-05 | 0.00199 |
| Unc13b        | 1.68202 | 1.85E-05 | 0.00219 |
| Asb4          | 1.67741 | 8.75E-05 | 0.00554 |
| Vill          | 1.6755  | 3.43E-05 | 0.00319 |
| Hacd4         | 1.66962 | 9.79E-05 | 0.00595 |
| Tmem100       | 1.65638 | 8.35E-05 | 0.00545 |
| Snn           | 1.64391 | 6.55E-05 | 0.00472 |
| Fam107a       | 1.6325  | 9.41E-05 | 0.00583 |
| Unc93b1       | 1.62389 | 1.88E-05 | 0.0022  |
| Plpp2         | 1.62065 | 0.00013  | 0.00706 |
| Aqp11         | 1.6191  | 1.15E-05 | 0.00157 |
| C130074G19Rik | 1.61424 | 0.00125  | 0.02848 |
| Cyp1b1        | 1.61408 | 2.00E-05 | 0.0023  |
| Oas1a         | 1.609   | 0.00022  | 0.00973 |
| Cyp4v3        | 1.6     | 1.42E-05 | 0.00183 |
| Vwf           | 1.59673 | 1.81E-05 | 0.00217 |
| Snx11         | 1.59431 | 0.00035  | 0.01328 |
| Etv4          | 1.59236 | 2.36E-05 | 0.00258 |
| Rassf9        | 1.58919 | 3.60E-05 | 0.00326 |
| Lhfp12        | 1.58465 | 4.08E-05 | 0.00351 |

|          |         |          |         |
|----------|---------|----------|---------|
| Tpd52    | 1.5823  | 2.85E-05 | 0.0029  |
| Dusp5    | 1.57395 | 0.00024  | 0.01053 |
| Chmp4c   | 1.56852 | 7.48E-05 | 0.00521 |
| Sorcs2   | 1.56467 | 2.76E-05 | 0.00283 |
| Jag1     | 1.554   | 5.77E-05 | 0.00437 |
| Abca1    | 1.5511  | 0.00287  | 0.04587 |
| Plcb2    | 1.5468  | 0.00013  | 0.00689 |
| Fam49a   | 1.54634 | 0.00012  | 0.00646 |
| Slc16a4  | 1.54346 | 4.39E-05 | 0.00374 |
| Ppm1j    | 1.54322 | 0.00105  | 0.02563 |
| Rgs2     | 1.54285 | 0.00256  | 0.04258 |
| Epas1    | 1.53953 | 0.00088  | 0.02325 |
| Rdh10    | 1.5393  | 5.29E-05 | 0.00415 |
| Fmnl1    | 1.53656 | 0.00011  | 0.00608 |
| Trpv2    | 1.53532 | 5.72E-05 | 0.00436 |
| Gsn      | 1.53381 | 8.34E-05 | 0.00545 |
| Sfxn3    | 1.53231 | 8.61E-05 | 0.00554 |
| Ubd      | 1.53165 | 0.02561  | 0.15674 |
| Tll7     | 1.53021 | 2.06E-05 | 0.00231 |
| Kctd12b  | 1.52842 | 0.0047   | 0.06069 |
| Naprt    | 1.52657 | 2.70E-05 | 0.00283 |
| Pak1     | 1.52477 | 2.04E-05 | 0.00231 |
| Traf3ip3 | 1.52283 | 2.57E-05 | 0.00273 |
| Fblim1   | 1.51583 | 0.00021  | 0.00943 |
| Ly6e     | 1.50658 | 0.0001   | 0.00601 |
| Tmem154  | 1.50187 | 7.76E-05 | 0.00532 |
| Ccl9     | 1.49987 | 0.0005   | 0.01603 |
| Pdlim4   | 1.48887 | 3.97E-05 | 0.00348 |
| Msrb3    | 1.48803 | 8.18E-05 | 0.00545 |
| Spint2   | 1.48664 | 0.00023  | 0.01019 |
| Tbc1d10c | 1.48423 | 5.65E-05 | 0.00434 |
| Osmr     | 1.47994 | 0.00041  | 0.01431 |
| Sgk3     | 1.4797  | 0.0001   | 0.00602 |
| Cd68     | 1.47278 | 5.13E-05 | 0.00408 |
| Cnksr1   | 1.47234 | 4.89E-05 | 0.00394 |
| Ly6a     | 1.47186 | 0.00011  | 0.00619 |
| Spata13  | 1.46602 | 0.00048  | 0.01588 |
| Cd82     | 1.46597 | 0.00011  | 0.00608 |
| Jag2     | 1.45984 | 0.00016  | 0.00827 |
| Lgl2     | 1.45862 | 0.00057  | 0.01747 |
| Prnd     | 1.45792 | 0.01115  | 0.10004 |
| Aldh1l1  | 1.45755 | 0.00036  | 0.0135  |
| Tnfrsf26 | 1.45551 | 5.43E-05 | 0.00422 |
| Plcd1    | 1.45293 | 0.00019  | 0.00921 |
| Hey1     | 1.45091 | 6.05E-05 | 0.00453 |
| Tmem254a | 1.4498  | 0.0016   | 0.03297 |
| Nxpe5    | 1.44832 | 3.53E-05 | 0.00322 |
| Stab1    | 1.4464  | 0.00074  | 0.02075 |
| Amigo2   | 1.44604 | 0.00017  | 0.00849 |
| Slc35g3  | 1.44415 | 6.91E-05 | 0.00491 |
| Fam43a   | 1.44386 | 0.00013  | 0.00692 |
| Dsp      | 1.43578 | 9.80E-05 | 0.00595 |
| Scn11a   | 1.43361 | 0.00017  | 0.0086  |
| Bmx      | 1.43263 | 4.86E-05 | 0.00393 |
| Cd53     | 1.42905 | 0.00451  | 0.05958 |
| Clec4n   | 1.42236 | 0.00316  | 0.04796 |
| Tppp3    | 1.41836 | 8.57E-05 | 0.00554 |
| Pdk4     | 1.40853 | 9.91E-05 | 0.00595 |

|          |         |          |         |
|----------|---------|----------|---------|
| Slc2a12  | 1.40698 | 7.24E-05 | 0.00512 |
| Neurl3   | 1.40411 | 0.00041  | 0.01431 |
| H2-D1    | 1.39979 | 0.00027  | 0.01149 |
| Pld2     | 1.39952 | 0.00011  | 0.00627 |
| Prkcdbp  | 1.39073 | 0.0002   | 0.00935 |
| Rasa4    | 1.38765 | 6.35E-05 | 0.00463 |
| Gbp2b    | 1.38696 | 0.0189   | 0.13238 |
| Cgnl1    | 1.38606 | 0.00081  | 0.022   |
| Trim14   | 1.38025 | 7.51E-05 | 0.00521 |
| Hbb-y    | 1.37964 | 0.0009   | 0.0235  |
| Zfp185   | 1.37602 | 8.01E-05 | 0.00545 |
| Adcy4    | 1.37441 | 0.00093  | 0.02376 |
| Hmgn3    | 1.37376 | 0.00042  | 0.01441 |
| Cyth4    | 1.36657 | 0.0002   | 0.00935 |
| Cpne8    | 1.36504 | 8.69E-05 | 0.00554 |
| Serpine1 | 1.36276 | 0.00409  | 0.05651 |
| Il13ra1  | 1.36152 | 0.00493  | 0.06206 |
| Ccdc184  | 1.36143 | 0.00088  | 0.02325 |
| Trim30a  | 1.36047 | 0.00706  | 0.07667 |
| Sept10   | 1.35732 | 0.00078  | 0.02134 |
| Smpdl3a  | 1.35606 | 6.31E-05 | 0.00463 |
| Slc12a2  | 1.35576 | 0.00064  | 0.01895 |
| Hoxd8    | 1.35034 | 6.34E-05 | 0.00463 |
| Thsd1    | 1.34605 | 0.00061  | 0.0183  |
| Nrep     | 1.34446 | 0.00745  | 0.07884 |
| Fam213a  | 1.34412 | 6.49E-05 | 0.0047  |
| Anxa6    | 1.33208 | 0.00114  | 0.02708 |
| Dusp9    | 1.32979 | 0.00014  | 0.00748 |
| Lgmn     | 1.32844 | 8.84E-05 | 0.00557 |
| Mvp      | 1.32771 | 0.00023  | 0.01016 |
| Nrtn     | 1.32637 | 0.00068  | 0.01979 |
| Oas1g    | 1.32167 | 0.0002   | 0.00935 |
| Uchl1    | 1.32151 | 0.00046  | 0.0153  |
| Spi1     | 1.31903 | 0.00014  | 0.00748 |
| Rps6ka3  | 1.31852 | 0.00242  | 0.04185 |
| Vwa5a    | 1.3156  | 0.0003   | 0.01201 |
| Pdgfa    | 1.31382 | 0.00081  | 0.022   |
| Syne4    | 1.30957 | 0.00067  | 0.01958 |
| Ethe1    | 1.30434 | 8.65E-05 | 0.00554 |
| Asic1    | 1.30363 | 0.00069  | 0.01993 |
| Plp2     | 1.30332 | 0.00151  | 0.03169 |
| Tinagl1  | 1.3029  | 0.00154  | 0.03215 |
| Zdhhc23  | 1.29662 | 0.00041  | 0.01431 |
| Armxc2   | 1.29568 | 0.0004   | 0.01406 |
| St14     | 1.29449 | 9.65E-05 | 0.00595 |
| Sp110    | 1.29239 | 0.00011  | 0.0061  |
| Cyp1a1   | 1.29031 | 0.00017  | 0.0086  |
| Cxcl1    | 1.28889 | 0.0043   | 0.05789 |
| Efna1    | 1.28606 | 0.00453  | 0.05977 |
| Abhd14b  | 1.28475 | 0.00056  | 0.01736 |
| Tpa      | 1.28307 | 0.00057  | 0.0174  |
| S1pr4    | 1.28274 | 9.72E-05 | 0.00595 |
| Gstt3    | 1.27824 | 0.00012  | 0.00657 |
| Pygm     | 1.27578 | 0.00014  | 0.00728 |
| F2rl1    | 1.27222 | 0.00021  | 0.00959 |
| Tmsb4x   | 1.26992 | 0.00246  | 0.04217 |
| Slc35d2  | 1.26775 | 0.00027  | 0.01142 |
| Tgfb3    | 1.26649 | 0.00039  | 0.01398 |

|               |         |         |         |
|---------------|---------|---------|---------|
| Pde3b         | 1.26208 | 0.00015 | 0.0079  |
| Etv5          | 1.25986 | 0.00024 | 0.01053 |
| Camsap3       | 1.25638 | 0.00104 | 0.02553 |
| Pim3          | 1.25529 | 0.00057 | 0.01747 |
| Rtp4          | 1.25419 | 0.02709 | 0.16094 |
| Myo1g         | 1.2538  | 0.00042 | 0.01438 |
| 4930412O13Rik | 1.25104 | 0.00031 | 0.0123  |
| Ajuba         | 1.24861 | 0.00014 | 0.00721 |
| Map4k3        | 1.24565 | 0.00054 | 0.0169  |
| Pdgfd         | 1.24268 | 0.00145 | 0.03115 |
| Dsc2          | 1.24227 | 0.0002  | 0.00935 |
| Erbp2         | 1.24226 | 0.00134 | 0.02974 |
| Naip6         | 1.24053 | 0.00048 | 0.01588 |
| Irak3         | 1.24013 | 0.00033 | 0.01278 |
| Bcl11a        | 1.23954 | 0.00025 | 0.01079 |
| Rasgef1b      | 1.23942 | 0.00035 | 0.01326 |
| Ece1          | 1.23787 | 0.001   | 0.02484 |
| Trib3         | 1.23726 | 0.00029 | 0.012   |
| Dock10        | 1.23501 | 0.00027 | 0.01133 |
| Tapbp         | 1.23227 | 0.00027 | 0.01149 |
| Clu           | 1.22862 | 0.00047 | 0.01552 |
| Fam187b       | 1.22683 | 0.00029 | 0.01192 |
| Gulp1         | 1.22576 | 0.001   | 0.02492 |
| Klc3          | 1.22448 | 0.0002  | 0.00935 |
| Itpr3         | 1.21932 | 0.00039 | 0.01398 |
| Ccdc136       | 1.21893 | 0.0008  | 0.02172 |
| Cd55          | 1.21722 | 0.00018 | 0.00903 |
| Mt1           | 1.21649 | 0.00277 | 0.04476 |
| Mmp23         | 1.21443 | 0.0002  | 0.00935 |
| Gja4          | 1.20705 | 0.00053 | 0.01672 |
| Mapkapk3      | 1.20498 | 0.00027 | 0.01141 |
| Rdh12         | 1.20397 | 0.00031 | 0.0123  |
| Cpt1b         | 1.20373 | 0.00089 | 0.02325 |
| Cd109         | 1.20279 | 0.01927 | 0.13352 |
| Rrad          | 1.1991  | 0.0002  | 0.00935 |
| Usp53         | 1.19789 | 0.00061 | 0.01843 |
| Bmp4          | 1.19776 | 0.0004  | 0.01406 |
| Uba7          | 1.19557 | 0.00026 | 0.01125 |
| Prr5l         | 1.1949  | 0.00324 | 0.04868 |
| Gbp9          | 1.19461 | 0.03143 | 0.17249 |
| Fam110c       | 1.19102 | 0.00098 | 0.02436 |
| Ncf2          | 1.18767 | 0.00031 | 0.01236 |
| Hpn           | 1.18553 | 0.00019 | 0.00921 |
| Nfkbie        | 1.1855  | 0.00072 | 0.02046 |
| Slc52a3       | 1.18324 | 0.0003  | 0.01216 |
| Pnp           | 1.18169 | 0.0003  | 0.01201 |
| Samd9l        | 1.18166 | 0.0308  | 0.17085 |
| Wdfy4         | 1.18161 | 0.0004  | 0.01414 |
| Chrna7        | 1.18088 | 0.00068 | 0.0197  |
| Sel1l3        | 1.18018 | 0.0002  | 0.00935 |
| Rgs3          | 1.17981 | 0.0035  | 0.05126 |
| Crym          | 1.17925 | 0.0002  | 0.00935 |
| Cd44          | 1.17852 | 0.00509 | 0.06304 |
| Slc7a7        | 1.17839 | 0.00037 | 0.01362 |
| B3galnt1      | 1.17439 | 0.00069 | 0.01993 |
| Parp9         | 1.17323 | 0.01598 | 0.12179 |
| Phyh          | 1.17    | 0.00049 | 0.01592 |
| Ptpn6         | 1.16993 | 0.00067 | 0.01956 |

|          |         |         |         |
|----------|---------|---------|---------|
| Pld4     | 1.16944 | 0.0005  | 0.01607 |
| Serpinf1 | 1.16874 | 0.00051 | 0.01614 |
| Rps6ka4  | 1.16735 | 0.00043 | 0.01471 |
| Hey2     | 1.16628 | 0.0005  | 0.01611 |
| Mgst1    | 1.16536 | 0.00064 | 0.01893 |
| Selp     | 1.16347 | 0.00124 | 0.02848 |
| Tspan2   | 1.16304 | 0.00831 | 0.08506 |
| Fat4     | 1.16213 | 0.01201 | 0.10372 |
| Anxa1    | 1.16022 | 0.03896 | 0.19509 |
| Car5b    | 1.15637 | 0.00025 | 0.01085 |
| Unc13d   | 1.15553 | 0.00745 | 0.07884 |
| Galnt12  | 1.15096 | 0.00032 | 0.01245 |
| Emp2     | 1.14997 | 0.00024 | 0.01053 |
| Socs3    | 1.14865 | 0.00077 | 0.02134 |
| Angpt1   | 1.14816 | 0.00037 | 0.01361 |
| Gap43    | 1.14641 | 0.00707 | 0.07667 |
| Cst3     | 1.14544 | 0.00039 | 0.01398 |
| Clcf1    | 1.141   | 0.00037 | 0.01361 |
| A4galt   | 1.1408  | 0.00026 | 0.0113  |
| Lsp1     | 1.13997 | 0.00028 | 0.01149 |
| Tmem8    | 1.13844 | 0.00027 | 0.01141 |
| Pik3ap1  | 1.1358  | 0.00138 | 0.03017 |
| Tifa     | 1.13576 | 0.00176 | 0.03455 |
| Tmem176a | 1.13256 | 0.00041 | 0.01431 |
| Gbp2     | 1.13209 | 0.01202 | 0.10372 |
| Itga4    | 1.13103 | 0.00036 | 0.01347 |
| Fos      | 1.13055 | 0.00168 | 0.03392 |
| Icam1    | 1.13038 | 0.00314 | 0.0479  |
| Stat4    | 1.12875 | 0.00102 | 0.02527 |
| Patj     | 1.12803 | 0.00063 | 0.01888 |
| Pstpip1  | 1.12712 | 0.00029 | 0.01192 |
| Traf1    | 1.12647 | 0.00033 | 0.01278 |
| Eva1a    | 1.12521 | 0.00157 | 0.03251 |
| Fxyd5    | 1.12294 | 0.00468 | 0.06059 |
| Xbp1     | 1.11993 | 0.00036 | 0.01347 |
| Nmnat2   | 1.1186  | 0.00033 | 0.01284 |
| Tm6sf1   | 1.11802 | 0.0015  | 0.03157 |
| Emb      | 1.11749 | 0.00052 | 0.01642 |
| Nrk      | 1.11685 | 0.00237 | 0.04121 |
| Aldoc    | 1.11541 | 0.00085 | 0.02285 |
| Cyb561   | 1.11305 | 0.00093 | 0.02376 |
| Egfl7    | 1.113   | 0.00115 | 0.02708 |
| Fzd6     | 1.11237 | 0.00115 | 0.0271  |
| Clec2d   | 1.11214 | 0.00032 | 0.0125  |
| Klf12    | 1.11106 | 0.00064 | 0.01893 |
| Psmb8    | 1.11075 | 0.00067 | 0.01956 |
| Gpc1     | 1.10895 | 0.00068 | 0.0197  |
| Cyrr1    | 1.10727 | 0.00929 | 0.09024 |
| Il17rc   | 1.10298 | 0.00086 | 0.02295 |
| Timd2    | 1.10072 | 0.00039 | 0.01398 |
| Pnp2     | 1.1007  | 0.00047 | 0.01556 |
| Avpi1    | 1.09773 | 0.00073 | 0.02066 |
| Ctse     | 1.09704 | 0.00191 | 0.03596 |
| Tec      | 1.09646 | 0.00037 | 0.01361 |
| H2-K1    | 1.09573 | 0.00044 | 0.01506 |
| Ndrp2    | 1.09456 | 0.00048 | 0.01588 |
| Arhgap9  | 1.09447 | 0.0008  | 0.02172 |
| Diaph2   | 1.09341 | 0.0032  | 0.04832 |



|               |         |         |         |
|---------------|---------|---------|---------|
| Slc18a2       | 1.09279 | 0.00036 | 0.0134  |
| Gatm          | 1.09091 | 0.00233 | 0.04087 |
| Acvr1l1       | 1.0904  | 0.00546 | 0.06602 |
| Ifit2         | 1.0903  | 0.00724 | 0.07758 |
| Mical1        | 1.08984 | 0.00069 | 0.01993 |
| Arntl2        | 1.08885 | 0.00045 | 0.01512 |
| Aph1b         | 1.08789 | 0.00092 | 0.02358 |
| Apbb1         | 1.0865  | 0.00306 | 0.04728 |
| Dkk2          | 1.08644 | 0.0049  | 0.062   |
| Cracr2b       | 1.085   | 0.00096 | 0.02421 |
| Mmrn2         | 1.08424 | 0.00553 | 0.06638 |
| Npr2          | 1.08144 | 0.00219 | 0.03924 |
| Cd24a         | 1.08009 | 0.00612 | 0.07089 |
| Slc44a1       | 1.07931 | 0.00071 | 0.02025 |
| B3gnt8        | 1.07815 | 0.00115 | 0.02708 |
| Lcp1          | 1.07762 | 0.01086 | 0.09915 |
| Col11a1       | 1.07747 | 0.00041 | 0.01431 |
| Srgn          | 1.07471 | 0.00046 | 0.01538 |
| Dtx3l         | 1.07379 | 0.01432 | 0.11379 |
| Arid5b        | 1.07298 | 0.0029  | 0.04591 |
| Sema6a        | 1.0723  | 0.00249 | 0.04218 |
| Fyb           | 1.07102 | 0.00051 | 0.01625 |
| Gimap4        | 1.0697  | 0.01136 | 0.10087 |
| Vsig10        | 1.06752 | 0.00081 | 0.022   |
| Pld3          | 1.06566 | 0.00106 | 0.02584 |
| Fgd2          | 1.06438 | 0.0005  | 0.01603 |
| Tspo          | 1.06369 | 0.00066 | 0.01941 |
| Pik3r5        | 1.06114 | 0.0005  | 0.01603 |
| Tnni2         | 1.05715 | 0.00223 | 0.03951 |
| Tes           | 1.05711 | 0.00236 | 0.04121 |
| Esam          | 1.05664 | 0.00253 | 0.04251 |
| Casp4         | 1.05426 | 0.00355 | 0.05159 |
| Rbp1          | 1.05383 | 0.00297 | 0.04656 |
| Nr4a2         | 1.05373 | 0.00167 | 0.03376 |
| Cd200r4       | 1.05037 | 0.00627 | 0.07147 |
| Rilp          | 1.04931 | 0.00078 | 0.02134 |
| Arhgef28      | 1.0477  | 0.00504 | 0.06282 |
| Lipa          | 1.04759 | 0.00186 | 0.03558 |
| Rnase6        | 1.04537 | 0.00089 | 0.02325 |
| Zfp69         | 1.04382 | 0.00097 | 0.02428 |
| Gpx1          | 1.04377 | 0.00147 | 0.03128 |
| Pcdhb22       | 1.04311 | 0.00149 | 0.03141 |
| Cd74          | 1.04308 | 0.00075 | 0.02097 |
| Prr13         | 1.04219 | 0.00103 | 0.02538 |
| Psmb9         | 1.03989 | 0.00176 | 0.03455 |
| B3gnt5        | 1.03668 | 0.00412 | 0.05688 |
| Als2cl        | 1.03319 | 0.00263 | 0.04339 |
| Gsdmd         | 1.03209 | 0.00131 | 0.02943 |
| Tnfaip8l1     | 1.02944 | 0.00088 | 0.02325 |
| Jazf1         | 1.02871 | 0.00145 | 0.03115 |
| Tlr4          | 1.02826 | 0.02179 | 0.14357 |
| Fes           | 1.02451 | 0.00249 | 0.04218 |
| 2200002D01Rik | 1.02432 | 0.00191 | 0.03596 |
| Dusp26        | 1.02321 | 0.00097 | 0.02428 |
| Man2b2        | 1.02111 | 0.00118 | 0.02757 |
| Ecscr         | 1.01914 | 0.00652 | 0.07279 |
| Dennd3        | 1.01904 | 0.00127 | 0.02893 |
| Rbm47         | 1.01723 | 0.00094 | 0.02392 |

|          |         |         |         |
|----------|---------|---------|---------|
| Ctsc     | 1.01536 | 0.00066 | 0.01954 |
| Upp1     | 1.01373 | 0.03024 | 0.16956 |
| Tmem176b | 1.012   | 0.00137 | 0.03013 |
| Ccl6     | 1.01151 | 0.00827 | 0.08482 |
| Lims2    | 1.01139 | 0.00132 | 0.0295  |
| Speg     | 1.01043 | 0.00237 | 0.04121 |
| Rnd1     | 1.00957 | 0.00556 | 0.06658 |
| Hlx      | 1.00916 | 0.00662 | 0.07329 |
| Ncoa7    | 1.00872 | 0.00248 | 0.04218 |
| Ift43    | 1.00421 | 0.00108 | 0.02614 |
| Slc9a7   | 1.00212 | 0.00101 | 0.02512 |
| Cdh24    | 1.001   | 0.00275 | 0.04467 |
| Reln     | -1.0001 | 0.03489 | 0.18382 |
| Ezh2     | -1.0022 | 0.00138 | 0.03013 |
| Sept9    | -1.0035 | 0.00161 | 0.03297 |
| Nudc     | -1.0041 | 0.00489 | 0.06194 |
| Nob1     | -1.0051 | 0.00429 | 0.05789 |
| Cep131   | -1.0063 | 0.00597 | 0.0699  |
| Creb3l1  | -1.0065 | 0.00124 | 0.02848 |
| Dnph1    | -1.0067 | 0.01242 | 0.10545 |
| Ahdc1    | -1.0088 | 0.00277 | 0.04476 |
| Pprc1    | -1.0128 | 0.00654 | 0.07279 |
| Smarcc1  | -1.0133 | 0.00176 | 0.03455 |
| Banf1    | -1.0144 | 0.00564 | 0.06729 |
| Foxm1    | -1.016  | 0.00192 | 0.03596 |
| Naa50    | -1.0166 | 0.00077 | 0.02134 |
| Zbtb12   | -1.0173 | 0.00377 | 0.05342 |
| Iqgap2   | -1.0191 | 0.00079 | 0.02167 |
| Pigyl    | -1.0222 | 0.00156 | 0.03246 |
| Tsc1     | -1.0234 | 0.00191 | 0.03596 |
| Mast2    | -1.0245 | 0.00164 | 0.03343 |
| Ncor2    | -1.0268 | 0.00278 | 0.04486 |
| Ppm1g    | -1.0269 | 0.00419 | 0.05757 |
| Ccne1    | -1.0276 | 0.00197 | 0.03654 |
| Hoxb2    | -1.0279 | 0.00184 | 0.03523 |
| Clpp     | -1.0282 | 0.00626 | 0.07147 |
| Uhrf1    | -1.0284 | 0.00264 | 0.04344 |
| Fkbp2    | -1.029  | 0.00252 | 0.04243 |
| Ung      | -1.0299 | 0.00359 | 0.05187 |
| Raver1   | -1.0308 | 0.00291 | 0.04598 |
| Fcgr3    | -1.0334 | 0.00353 | 0.05147 |
| Nfxl1    | -1.034  | 0.00064 | 0.01893 |
| BC030867 | -1.035  | 0.00204 | 0.03756 |
| Eif5b    | -1.0387 | 0.00125 | 0.02848 |
| Pcdh7    | -1.0444 | 0.00061 | 0.0183  |
| Garem2   | -1.0463 | 0.00074 | 0.02084 |
| Fgf10    | -1.0479 | 0.00244 | 0.04194 |
| Ldlrap1  | -1.0483 | 0.00193 | 0.03614 |
| Aunip    | -1.0519 | 0.00202 | 0.03718 |
| Noc4l    | -1.0528 | 0.002   | 0.03702 |
| Pgd      | -1.0531 | 0.0013  | 0.02942 |
| Pcyt1b   | -1.0531 | 0.00298 | 0.04656 |
| Tiam1    | -1.0541 | 0.00162 | 0.0332  |
| Tspoap1  | -1.0545 | 0.00119 | 0.02789 |
| Lig1     | -1.0554 | 0.00131 | 0.02945 |
| Cyp26b1  | -1.0572 | 0.01553 | 0.12027 |
| Afg3l2   | -1.0575 | 0.0016  | 0.03297 |
| Vegfb    | -1.0576 | 0.00653 | 0.07279 |

|           |         |         |         |
|-----------|---------|---------|---------|
| Gtf3c2    | -1.067  | 0.00052 | 0.01644 |
| Mfsd2b    | -1.0714 | 0.00591 | 0.06958 |
| Ncbp2     | -1.0716 | 0.00041 | 0.01431 |
| Capn5     | -1.0724 | 0.00091 | 0.0235  |
| Tdg       | -1.0752 | 0.00072 | 0.02046 |
| Dot1l     | -1.0752 | 0.00255 | 0.04258 |
| Phgdh     | -1.0795 | 0.00318 | 0.04806 |
| Pde4dip   | -1.0805 | 0.00481 | 0.0615  |
| Plk1      | -1.081  | 0.00181 | 0.03523 |
| Tspan14   | -1.0831 | 0.00799 | 0.0829  |
| Chaf1a    | -1.0878 | 0.00269 | 0.04387 |
| Col1a1    | -1.0889 | 0.00083 | 0.02244 |
| Stampb    | -1.0899 | 0.00122 | 0.02811 |
| Sparc     | -1.0915 | 0.00166 | 0.03367 |
| Terf1     | -1.0931 | 0.00047 | 0.01552 |
| Safb2     | -1.0972 | 0.00217 | 0.03899 |
| Rreb1     | -1.0974 | 0.00239 | 0.04145 |
| Tet1      | -1.0978 | 0.0006  | 0.01816 |
| F13a1     | -1.0994 | 0.00037 | 0.01361 |
| Car8      | -1.1007 | 0.00055 | 0.01714 |
| Pls1      | -1.107  | 0.00037 | 0.01361 |
| Mybbp1a   | -1.1074 | 0.00254 | 0.04251 |
| Mrps34    | -1.1077 | 0.00147 | 0.03128 |
| Ppp3      | -1.114  | 0.00055 | 0.01714 |
| Mns1      | -1.1195 | 0.00143 | 0.03089 |
| Hist1h2br | -1.1202 | 0.00072 | 0.02051 |
| Ddx47     | -1.1203 | 0.00049 | 0.01603 |
| Hnrnpd    | -1.1217 | 0.00053 | 0.01672 |
| Mylk3     | -1.1224 | 0.00034 | 0.01285 |
| Hirip3    | -1.1228 | 0.00106 | 0.02586 |
| Prcc2c    | -1.129  | 0.00063 | 0.01893 |
| Ubash3b   | -1.1323 | 0.00222 | 0.03943 |
| Atp2a3    | -1.1335 | 0.00289 | 0.04587 |
| Mtfr2     | -1.1348 | 0.00037 | 0.01362 |
| Tmem108   | -1.1359 | 0.00092 | 0.02358 |
| Sptb      | -1.1368 | 0.00038 | 0.01377 |
| Cenpl     | -1.1381 | 0.00033 | 0.0128  |
| Cit       | -1.1412 | 0.0019  | 0.03596 |
| Gm6793    | -1.1422 | 0.00228 | 0.04022 |
| Nudt16l1  | -1.1433 | 0.00096 | 0.02423 |
| Wipf3     | -1.1441 | 0.00189 | 0.03596 |
| Pmm1      | -1.1448 | 0.00468 | 0.06059 |
| Srp68     | -1.1455 | 0.00159 | 0.03294 |
| Fam65a    | -1.1508 | 0.00239 | 0.04149 |
| Ctla2a    | -1.1511 | 0.00131 | 0.02943 |
| Fam222a   | -1.1516 | 0.00045 | 0.01518 |
| Prr12     | -1.152  | 0.00166 | 0.03367 |
| Wdr89     | -1.1521 | 0.00075 | 0.02097 |
| Rpp25     | -1.1527 | 0.01214 | 0.10437 |
| Safb      | -1.1559 | 0.00146 | 0.03118 |
| Csf3r     | -1.1569 | 0.00088 | 0.02325 |
| Klhl21    | -1.1587 | 0.00134 | 0.02974 |
| Apitd1    | -1.1589 | 0.00221 | 0.0394  |
| Ahcy1     | -1.1601 | 0.00044 | 0.01506 |
| Rnf5      | -1.1626 | 0.00154 | 0.03215 |
| Rap2b     | -1.165  | 0.00065 | 0.01928 |
| Cdk11b    | -1.1718 | 0.00067 | 0.01958 |
| Gfra2     | -1.172  | 0.00086 | 0.02295 |

|           |         |          |         |
|-----------|---------|----------|---------|
| Zcchc10   | -1.1727 | 0.0003   | 0.01214 |
| Samsn1    | -1.1759 | 0.00033  | 0.01278 |
| Sapcd1    | -1.1763 | 0.01297  | 0.1077  |
| Prpf3     | -1.1791 | 0.00035  | 0.01326 |
| Tspan7    | -1.1804 | 0.00488  | 0.06194 |
| Aurka     | -1.1806 | 0.00039  | 0.01398 |
| Nolc1     | -1.1902 | 0.00183  | 0.03523 |
| Ddx21     | -1.1905 | 0.00073  | 0.02066 |
| Nxpe3     | -1.1918 | 0.00057  | 0.01739 |
| Cap2      | -1.1931 | 0.00026  | 0.01128 |
| Adamts3   | -1.1961 | 0.00134  | 0.02975 |
| Pcbp1     | -1.1961 | 0.00169  | 0.03392 |
| BC048403  | -1.1999 | 0.00077  | 0.02134 |
| Muc13     | -1.2015 | 0.00404  | 0.05612 |
| Mdh2      | -1.2156 | 0.00052  | 0.01652 |
| Emilin1   | -1.2205 | 0.00105  | 0.02563 |
| Fth1      | -1.2232 | 0.00196  | 0.03648 |
| Hoxb5     | -1.2265 | 0.0003   | 0.01201 |
| Reep6     | -1.228  | 0.00146  | 0.03118 |
| Hnrnpa2b1 | -1.2323 | 0.00024  | 0.01054 |
| Car4      | -1.2336 | 0.00015  | 0.00787 |
| Gse1      | -1.2404 | 0.00502  | 0.06272 |
| Pom121    | -1.241  | 0.00088  | 0.02325 |
| Pitpnb    | -1.241  | 0.00021  | 0.00943 |
| Mbd3      | -1.2454 | 0.00324  | 0.04868 |
| Tgfb1     | -1.2482 | 0.00152  | 0.03178 |
| Desi1     | -1.2492 | 0.00024  | 0.01053 |
| Pdgfrb    | -1.2494 | 0.0012   | 0.02794 |
| Gar1      | -1.2572 | 0.00119  | 0.02789 |
| Hexim1    | -1.2573 | 0.00029  | 0.01201 |
| Psmd7     | -1.2577 | 0.00041  | 0.01431 |
| Srrm1     | -1.266  | 0.00028  | 0.01158 |
| P2rx1     | -1.2837 | 0.00039  | 0.01398 |
| Slc30a3   | -1.2892 | 0.00245  | 0.04201 |
| Hist1h1b  | -1.29   | 0.00128  | 0.02919 |
| Pcsk1n    | -1.2933 | 0.00035  | 0.01324 |
| E2f1      | -1.2933 | 0.00129  | 0.02919 |
| Fbl       | -1.2996 | 0.00092  | 0.02358 |
| Hsph1     | -1.2998 | 0.00078  | 0.02134 |
| Polr3c    | -1.3    | 0.00024  | 0.01059 |
| Gpatch4   | -1.3006 | 0.00181  | 0.03523 |
| Igf1      | -1.3065 | 0.0001   | 0.006   |
| Rasl11a   | -1.3072 | 0.00709  | 0.07671 |
| Nap1l2    | -1.3124 | 0.00033  | 0.0128  |
| Gpx3      | -1.3275 | 0.00018  | 0.00873 |
| Srm       | -1.3287 | 0.00359  | 0.05187 |
| Rrs1      | -1.3332 | 0.00077  | 0.02134 |
| Fam98a    | -1.3463 | 0.00011  | 0.00608 |
| Slc35e3   | -1.3516 | 0.00014  | 0.00748 |
| Mdm1      | -1.3555 | 0.0002   | 0.00935 |
| Smyd1     | -1.3616 | 9.13E-05 | 0.00572 |
| Cdca8     | -1.3682 | 0.00018  | 0.00872 |
| Scamp3    | -1.3683 | 0.00011  | 0.00617 |
| Nudt4     | -1.3701 | 0.0002   | 0.00935 |
| Tubg2     | -1.3722 | 7.58E-05 | 0.00523 |
| Figl1     | -1.3798 | 0.00211  | 0.03848 |
| Vcan      | -1.3801 | 0.00011  | 0.00615 |
| Sall3     | -1.3815 | 0.00095  | 0.02408 |

|         |         |          |         |
|---------|---------|----------|---------|
| Fus     | -1.383  | 0.00043  | 0.01476 |
| Nefl    | -1.3931 | 9.37E-05 | 0.00583 |
| Minos1  | -1.396  | 6.23E-05 | 0.00463 |
| Aplnr   | -1.3962 | 0.00194  | 0.03619 |
| Lrrn2   | -1.4001 | 6.68E-05 | 0.00478 |
| Aqp8    | -1.4045 | 0.0011   | 0.02639 |
| Grap2   | -1.4068 | 0.00039  | 0.01395 |
| Lin28a  | -1.4105 | 0.00183  | 0.03523 |
| Lat     | -1.4113 | 0.00046  | 0.01548 |
| Cdadcl1 | -1.4118 | 0.00022  | 0.00978 |
| Gtf3c5  | -1.4141 | 0.00055  | 0.0171  |
| Bgn     | -1.4233 | 0.00109  | 0.02616 |
| Hnrnp3  | -1.4285 | 8.36E-05 | 0.00545 |
| Myc     | -1.4323 | 0.00017  | 0.00858 |
| C1qbp   | -1.4329 | 0.00031  | 0.01227 |
| Hk2     | -1.4363 | 0.00014  | 0.00728 |
| Alas2   | -1.4378 | 4.79E-05 | 0.00391 |
| Prmt1   | -1.4409 | 0.00123  | 0.02841 |
| Tnfaip6 | -1.4426 | 3.36E-05 | 0.00317 |
| Apoo-ps | -1.467  | 0.02718  | 0.16113 |
| Taf15   | -1.4695 | 0.00011  | 0.00608 |
| Olr1    | -1.4703 | 0.0009   | 0.02344 |
| Eif3b   | -1.4732 | 0.00094  | 0.0239  |
| Trim54  | -1.4773 | 0.00052  | 0.01642 |
| Nrgn    | -1.4938 | 8.08E-05 | 0.00545 |
| Rrm2    | -1.4953 | 8.28E-05 | 0.00545 |
| Gm13889 | -1.5063 | 0.00174  | 0.03455 |
| Mc5r    | -1.5116 | 0.0015   | 0.03157 |
| Slc24a3 | -1.5265 | 0.00013  | 0.00715 |
| Dynlt1f | -1.5273 | 0.00046  | 0.01538 |
| Sigmar1 | -1.5348 | 0.00016  | 0.00837 |
| Irs2    | -1.5405 | 0.00091  | 0.02358 |
| Fam50a  | -1.5435 | 4.09E-05 | 0.00351 |
| Ptpn7   | -1.5616 | 0.00019  | 0.00926 |
| Anp32e  | -1.5786 | 3.27E-05 | 0.00316 |
| Dynll2  | -1.5991 | 5.00E-05 | 0.004   |
| Mrv1    | -1.6004 | 0.00011  | 0.00633 |
| Adgrg3  | -1.6191 | 5.98E-05 | 0.0045  |
| Tnfaip8 | -1.6208 | 4.73E-05 | 0.00391 |
| Hnrnpa3 | -1.6215 | 0.00032  | 0.01268 |
| Prrt4   | -1.6223 | 0.00015  | 0.00755 |
| Samd14  | -1.6311 | 0.00021  | 0.00971 |
| Ptdss2  | -1.6663 | 0.00017  | 0.00854 |
| Ubash3a | -1.6694 | 1.39E-05 | 0.00181 |
| Tnnt2   | -1.6777 | 1.32E-05 | 0.00174 |
| Mdga1   | -1.6815 | 0.00011  | 0.00623 |
| Has2    | -1.7108 | 4.66E-05 | 0.00391 |
| Rad51   | -1.7261 | 3.70E-05 | 0.00332 |
| Srsf4   | -1.7321 | 4.76E-05 | 0.00391 |
| Mpl     | -1.7335 | 4.62E-05 | 0.00391 |
| Nlrc3   | -1.74   | 8.32E-06 | 0.00138 |
| Ank3    | -1.745  | 6.46E-06 | 0.00126 |
| Kcnj5   | -1.7501 | 6.03E-06 | 0.00125 |
| F2rl2   | -1.7505 | 2.27E-05 | 0.0025  |
| Prtg    | -1.8072 | 1.44E-05 | 0.00183 |
| Ncl     | -1.8123 | 3.85E-05 | 0.0034  |
| Snrpd3  | -1.8149 | 2.47E-05 | 0.00265 |
| Phlda1  | -1.8465 | 0.00013  | 0.00692 |

|           |         |          |          |
|-----------|---------|----------|----------|
| Bmp2      | -1.8569 | 1.02E-05 | 0.0015   |
| Hapln1    | -1.8595 | 4.74E-06 | 0.00119  |
| Etl4      | -1.87   | 5.68E-06 | 0.00125  |
| Gas7      | -1.9061 | 4.91E-06 | 0.00119  |
| Etv2      | -1.9441 | 0.00057  | 0.01739  |
| Syt13     | -1.9797 | 7.45E-05 | 0.00521  |
| Txn2      | -1.9814 | 5.86E-06 | 0.00125  |
| Kcnk9     | -2.0627 | 2.55E-06 | 0.00102  |
| Rnd2      | -2.0925 | 0.00049  | 0.01603  |
| Anp32b    | -2.1036 | 3.21E-05 | 0.00316  |
| Fzd10     | -2.1061 | 9.87E-05 | 0.00595  |
| Mrpl12    | -2.3072 | 3.52E-05 | 0.00322  |
| Igfbp5    | -2.308  | 5.91E-06 | 0.00125  |
| Mpo       | -2.3186 | 2.25E-06 | 0.00097  |
| Gstp2     | -2.3663 | 0.04072  | 0.19917  |
| Atp6v0c   | -2.7443 | 0.01382  | 0.11156  |
| Kctd12    | -3.6978 | 1.99E-05 | 0.0023   |
| Hist2h3c1 | -3.9156 | 0.0398   | 0.19725  |
| Rps16     | -3.9973 | 2.65E-09 | 1.53E-05 |

**Supplementary Table 3** Genes de-regulated in HP cells, FC given as +dox/-dox

| Gene_ID  | logFC   | Pvalue   | FDR     |
|----------|---------|----------|---------|
| Hprt     | 3.27995 | 7.39E-06 | 0.0205  |
| Mt2      | 3.22725 | 0.00287  | 0.09213 |
| Pdzk1ip1 | 2.93616 | 9.10E-06 | 0.0205  |
| Mogat2   | 2.2806  | 5.03E-05 | 0.027   |
| Acer2    | 2.18015 | 3.22E-06 | 0.01814 |
| Trim47   | 2.1665  | 7.26E-06 | 0.0205  |
| Il1b     | 2.07834 | 0.00819  | 0.13927 |
| Thsd1    | 2.05211 | 1.11E-05 | 0.02088 |
| Rhag     | 2.04094 | 2.15E-05 | 0.02206 |
| Cdh5     | 2.0043  | 1.62E-05 | 0.02204 |
| Plp2     | 1.9538  | 0.00088  | 0.06026 |
| Stk26    | 1.90548 | 0.00077  | 0.05723 |
| Capg     | 1.87907 | 0.00059  | 0.04992 |
| Naaa     | 1.87456 | 0.00014  | 0.03732 |
| Nqo1     | 1.87156 | 0.00057  | 0.04956 |
| Tspan8   | 1.83014 | 0.0001   | 0.03475 |
| Ccnd1    | 1.82999 | 0.00081  | 0.05922 |
| Nr4a1    | 1.80524 | 0.00079  | 0.0585  |
| Spr2a3   | 1.79399 | 8.70E-05 | 0.03381 |
| Spint2   | 1.77538 | 0.00867  | 0.14161 |
| Procr    | 1.77388 | 1.66E-05 | 0.02204 |
| Adcy4    | 1.7617  | 3.57E-05 | 0.02316 |
| Ramp2    | 1.75783 | 2.15E-05 | 0.02206 |
| Asb4     | 1.7029  | 9.82E-05 | 0.03475 |
| Amigo2   | 1.69977 | 0.00134  | 0.06999 |
| Ptprb    | 1.6748  | 1.76E-05 | 0.02204 |
| Egfl7    | 1.65281 | 5.01E-05 | 0.027   |
| Neurl3   | 1.63584 | 0.00049  | 0.0491  |
| Ly6a     | 1.6215  | 2.65E-05 | 0.02316 |
| Spr2a1   | 1.61291 | 0.00036  | 0.04404 |
| Naprt    | 1.59854 | 0.00069  | 0.05384 |
| Ltb      | 1.57856 | 0.00023  | 0.04077 |
| Ccdc141  | 1.56302 | 0.00377  | 0.10309 |
| Ivl      | 1.54409 | 0.00548  | 0.11738 |

|          |         |          |         |
|----------|---------|----------|---------|
| Cdkn1c   | 1.53654 | 0.0004   | 0.04597 |
| Nxpe5    | 1.53233 | 0.00016  | 0.03732 |
| Ptpn18   | 1.53196 | 0.00011  | 0.03475 |
| Bmp4     | 1.51992 | 3.32E-05 | 0.02316 |
| Cd200r3  | 1.51794 | 0.0101   | 0.1529  |
| Slc16a9  | 1.50548 | 0.00015  | 0.03732 |
| Cd79b    | 1.46021 | 0.00018  | 0.03732 |
| Selp     | 1.4567  | 0.0002   | 0.03904 |
| Matk     | 1.43386 | 3.06E-05 | 0.02316 |
| Armxc2   | 1.42074 | 0.00011  | 0.03475 |
| S100a4   | 1.42033 | 0.0027   | 0.09022 |
| Ms4a6d   | 1.39383 | 0.00693  | 0.13061 |
| Mfng     | 1.37699 | 0.00083  | 0.05976 |
| Lsp1     | 1.3756  | 0.03435  | 0.26479 |
| Smtnl1   | 1.36941 | 0.00103  | 0.06242 |
| Fgd5     | 1.36443 | 0.00017  | 0.03732 |
| Lst1     | 1.36367 | 0.00042  | 0.04603 |
| Plcb2    | 1.35391 | 4.76E-05 | 0.027   |
| Sox18    | 1.33822 | 6.81E-05 | 0.02959 |
| Sla      | 1.33681 | 0.00764  | 0.13502 |
| Coro2a   | 1.33524 | 0.00076  | 0.05723 |
| Sh3bgrl2 | 1.33041 | 0.00294  | 0.09276 |
| Ctsj     | 1.32975 | 0.00011  | 0.03475 |
| Acat3    | 1.32573 | 0.00744  | 0.1336  |
| Ropn1l   | 1.31745 | 0.00853  | 0.14129 |
| Cgnl1    | 1.31012 | 0.00325  | 0.09849 |
| Vill     | 1.29873 | 0.00012  | 0.03475 |
| Nrep     | 1.29287 | 0.00034  | 0.0439  |
| Alox12   | 1.29273 | 0.01508  | 0.17886 |
| Bcl11a   | 1.2927  | 0.00253  | 0.08838 |
| Id3      | 1.27842 | 6.61E-05 | 0.02959 |
| Krt19    | 1.27402 | 0.02486  | 0.22494 |
| Ecscr    | 1.26618 | 0.00017  | 0.03732 |
| Eya2     | 1.25984 | 0.00023  | 0.04077 |
| Il4      | 1.25324 | 0.00097  | 0.06242 |
| Ldhb     | 1.25241 | 0.00027  | 0.04106 |
| Fgf3     | 1.24913 | 0.00342  | 0.10123 |
| Zfp991   | 1.24616 | 0.02088  | 0.20722 |
| Mgst3    | 1.24362 | 0.02804  | 0.23871 |
| Fn1      | 1.24189 | 0.00483  | 0.11267 |
| Icam2    | 1.24014 | 0.0005   | 0.0491  |
| Vegfc    | 1.23622 | 0.00036  | 0.04404 |
| Slc22a18 | 1.23219 | 0.00028  | 0.04106 |
| Ehd2     | 1.22963 | 0.00107  | 0.06354 |
| Rasgrp3  | 1.22935 | 7.12E-05 | 0.02959 |
| Dusp5    | 1.22405 | 0.00155  | 0.07302 |
| Ripk3    | 1.22228 | 0.00028  | 0.04106 |
| Tgm2     | 1.21375 | 0.00025  | 0.04106 |
| Irf6     | 1.20059 | 0.00283  | 0.09201 |
| Rbp1     | 1.19446 | 0.00093  | 0.06239 |
| Pim2     | 1.19173 | 0.00665  | 0.12835 |
| Setbp1   | 1.18996 | 0.00036  | 0.04404 |
| Esam     | 1.18842 | 0.00147  | 0.07092 |
| Aldh1a1  | 1.18789 | 0.00161  | 0.07445 |
| Gvin1    | 1.1875  | 0.00355  | 0.10124 |
| Pygl     | 1.1853  | 0.00111  | 0.06354 |
| Spn      | 1.18274 | 0.00232  | 0.08617 |
| Slc6a20a | 1.17634 | 0.00037  | 0.04425 |

|           |         |         |         |
|-----------|---------|---------|---------|
| Hes1      | 1.17447 | 0.00012 | 0.03475 |
| Gap43     | 1.17051 | 0.02853 | 0.24035 |
| Ptrf      | 1.16881 | 0.00023 | 0.04077 |
| Gimap6    | 1.16869 | 0.00069 | 0.05384 |
| Nrtn      | 1.16017 | 0.01061 | 0.15623 |
| Plxnd1    | 1.15581 | 0.00012 | 0.03475 |
| Sfxn3     | 1.155   | 0.00202 | 0.08328 |
| Ssh3      | 1.14736 | 0.00012 | 0.03475 |
| Cyp4v3    | 1.14666 | 0.00109 | 0.06354 |
| Mt1       | 1.1436  | 0.01734 | 0.19002 |
| Ces2g     | 1.13815 | 0.00109 | 0.06354 |
| Notch1    | 1.1373  | 0.00016 | 0.03732 |
| Ctse      | 1.13469 | 0.00031 | 0.0422  |
| Ethe1     | 1.1336  | 0.00022 | 0.04077 |
| Stat4     | 1.13278 | 0.00012 | 0.03475 |
| Rab11fip5 | 1.12934 | 0.00061 | 0.05126 |
| Adgre5    | 1.12884 | 0.00025 | 0.04106 |
| Marveld2  | 1.12837 | 0.0003  | 0.0422  |
| Ptchd1    | 1.12267 | 0.0095  | 0.14879 |
| Pon3      | 1.12064 | 0.00018 | 0.03732 |
| Patj      | 1.11836 | 0.00676 | 0.12854 |
| Tfec      | 1.11732 | 0.00749 | 0.1336  |
| Spint1    | 1.11627 | 0.0014  | 0.07025 |
| Pak1      | 1.11348 | 0.00054 | 0.0494  |
| Gimap5    | 1.11116 | 0.0005  | 0.0491  |
| Chrnbl    | 1.10946 | 0.001   | 0.06242 |
| Sp110     | 1.10889 | 0.00203 | 0.08328 |
| Oas1g     | 1.10833 | 0.00462 | 0.11142 |
| Npr2      | 1.10763 | 0.00033 | 0.0434  |
| Mmrn1     | 1.10543 | 0.00089 | 0.06048 |
| Ocln      | 1.10526 | 0.00027 | 0.04106 |
| Abi3      | 1.09699 | 0.00218 | 0.08486 |
| Fmn1      | 1.08009 | 0.0022  | 0.08501 |
| Adam33    | 1.07604 | 0.00027 | 0.04106 |
| Ppm1j     | 1.07497 | 0.00043 | 0.04603 |
| Sec14l2   | 1.07299 | 0.00425 | 0.10992 |
| Hpn       | 1.07172 | 0.00066 | 0.05366 |
| Anxa5     | 1.07079 | 0.00385 | 0.10421 |
| Sox7      | 1.06986 | 0.01215 | 0.16475 |
| Slc25a45  | 1.06817 | 0.00336 | 0.10002 |
| Dock2     | 1.06812 | 0.00032 | 0.0434  |
| Nos3      | 1.06582 | 0.00017 | 0.03732 |
| Tnfrsf2   | 1.06031 | 0.00145 | 0.07025 |
| Cd55      | 1.05851 | 0.00302 | 0.09424 |
| Rasip1    | 1.05635 | 0.00271 | 0.09022 |
| Dsc2      | 1.05573 | 0.01349 | 0.16999 |
| Gxylt2    | 1.05399 | 0.00026 | 0.04106 |
| Etv4      | 1.05115 | 0.00454 | 0.11142 |
| Rps6ka3   | 1.04951 | 0.00016 | 0.03732 |
| Spry2     | 1.04745 | 0.00018 | 0.03732 |
| Traf3ip3  | 1.04662 | 0.00169 | 0.07633 |
| Pdgfrb    | 1.04331 | 0.00028 | 0.04106 |
| Adcy7     | 1.04084 | 0.00072 | 0.05525 |
| Npy       | 1.03781 | 0.03038 | 0.24777 |
| Ackr1     | 1.03779 | 0.00115 | 0.0641  |
| Krt7      | 1.03543 | 0.00629 | 0.12449 |
| Vamp5     | 1.03533 | 0.00328 | 0.09849 |
| Rfx2      | 1.03325 | 0.00454 | 0.11142 |



|               |         |          |         |
|---------------|---------|----------|---------|
| Angpt1        | 1.03246 | 0.0099   | 0.15144 |
| Sowaha        | 1.03161 | 0.01176  | 0.16394 |
| Ptpcr         | 1.03105 | 0.01957  | 0.20095 |
| Pdlim2        | 1.03105 | 0.00674  | 0.12854 |
| Fam189a2      | 1.0297  | 0.00028  | 0.04106 |
| Rab27a        | 1.02776 | 0.00156  | 0.0731  |
| Cyth4         | 1.02681 | 0.00351  | 0.10124 |
| Pygm          | 1.02127 | 0.0002   | 0.03904 |
| Palld         | 1.02095 | 0.00023  | 0.04077 |
| Jag2          | 1.0209  | 0.00043  | 0.04603 |
| Tmem176b      | 1.02058 | 0.00475  | 0.11214 |
| Tle6          | 1.01937 | 0.00143  | 0.07025 |
| Itih5         | 1.01853 | 0.00197  | 0.08248 |
| Timp1         | 1.0167  | 0.01372  | 0.17056 |
| Ccnd2         | 1.01299 | 0.00029  | 0.04154 |
| Npr1          | 1.0111  | 0.00139  | 0.07025 |
| Dusp4         | 1.00896 | 0.0002   | 0.03904 |
| Tbxas1        | 1.00467 | 0.00034  | 0.04363 |
| Dpysl3        | 1.00383 | 0.00349  | 0.10124 |
| Acvrl1        | 1.00161 | 0.00141  | 0.07025 |
| Antxr2        | 1.00057 | 0.00082  | 0.05949 |
| Fech          | -1.0019 | 0.02868  | 0.2414  |
| Il10ra        | -1.0098 | 0.00471  | 0.11192 |
| Ccnb1ip1      | -1.0141 | 0.00256  | 0.08845 |
| Kctd12        | -1.0181 | 0.03788  | 0.27653 |
| Hecw2         | -1.0203 | 0.0004   | 0.04597 |
| Ddah1         | -1.0225 | 0.00045  | 0.04708 |
| Nudt4         | -1.0297 | 0.00333  | 0.09963 |
| Btn1a1        | -1.0474 | 0.00075  | 0.05677 |
| Pde5a         | -1.0548 | 0.00374  | 0.10296 |
| Irs2          | -1.0571 | 0.00023  | 0.04077 |
| Pcyt1b        | -1.0583 | 0.002    | 0.08328 |
| Cda           | -1.0598 | 0.00278  | 0.0917  |
| Slc14a1       | -1.0758 | 0.00229  | 0.08582 |
| Tmem56        | -1.1108 | 0.00025  | 0.04106 |
| Cpne7         | -1.1226 | 0.00015  | 0.03732 |
| Rpp25         | -1.1283 | 0.00017  | 0.03732 |
| Mdga1         | -1.136  | 0.00224  | 0.08522 |
| Usp51         | -1.1388 | 0.00037  | 0.04432 |
| Kcnj5         | -1.1473 | 0.00053  | 0.0491  |
| Reep1         | -1.1498 | 0.00017  | 0.03732 |
| Ajap1         | -1.1665 | 0.0001   | 0.03475 |
| Gja6          | -1.2308 | 0.0003   | 0.0422  |
| Phlda1        | -1.231  | 0.00065  | 0.05342 |
| Myk3          | -1.2429 | 7.36E-05 | 0.02959 |
| Tmcc2         | -1.244  | 6.65E-05 | 0.02959 |
| Efnb1         | -1.3017 | 0.00024  | 0.04077 |
| Etl4          | -1.3577 | 0.00029  | 0.04187 |
| Enpp1         | -1.4311 | 0.00054  | 0.0494  |
| Slc38a5       | -1.44   | 0.00213  | 0.0848  |
| 6030468B19Rik | -1.4432 | 7.35E-05 | 0.02959 |
| Samd14        | -1.477  | 3.30E-05 | 0.02316 |
| Hsd3b1        | -1.5003 | 0.0002   | 0.03904 |
| Alas2         | -1.5266 | 0.00243  | 0.08754 |
| Figl1         | -1.7618 | 6.27E-05 | 0.02959 |
| Aqp8          | -1.7727 | 3.31E-05 | 0.02316 |
| Apoa-ps       | -2.2708 | 0.001    | 0.06242 |
| Srp54b        | -3.1904 | 7.03E-07 | 0.00792 |

|        |         |          |         |
|--------|---------|----------|---------|
| Hbb-bs | -4.8154 | 3.70E-05 | 0.02316 |
|--------|---------|----------|---------|

**Supplementary Table 4** Genes de-regulated in HE1-HE2 transition, G11 – upregulated in both, G12 – upregulated in - dox, G21 – upregulated in + dox, G02 – downregulated in –dox, G20 – downregulated in +dox, G00 downregulated in both

| G11      | G12           | G21           | G02           | G20      | G00           |
|----------|---------------|---------------|---------------|----------|---------------|
| Al467606 | 6030468B19Rik | 2310039H08Rik | 4931406P16Rik | Acta1    | 1500009L16Rik |
| Adgrg1   | Abca2         | Abhd11        | 6430548M08Rik | Adm      | Abhd6         |
| Adgrg3   | Abhd15        | Acap1         | 9430020K01Rik | Adrb1    | Acta2         |
| Alas2    | Ache          | Acss2         | 9930012K11Rik | Aebp1    | Adam19        |
| Aldh2    | Acot11        | Adap1         | Abi3          | Ano1     | Adamts7       |
| Alox5    | Adcy9         | Adcy7         | Acer2         | Arc      | Adgrf5        |
| Alox5ap  | Adssl1        | Adgre4        | Acvr1         | Arhgef17 | Adgrg6        |
| Ank3     | Ahi1          | Adgrg5        | Adam15        | Armxc4   | Ahnak         |
| Arhgap25 | Apoc1         | Ahrr          | Adamts4       | Atp11a   | Akap12        |
| Arhgap45 | Apoo-ps       | Akr1b10       | Adcy4         | Bex1     | Amot1         |
| Arhgap6  | B9d2          | Alox12        | Adrb3         | Bex3     | Apccd1        |
| Art4     | Bcl7a         | Angpt1        | Afdn          | Bex4     | Arhgef15      |
| Atp2a3   | Camkk1        | Apobec1       | Amigo2        | Bhlhe40  | Bcar1         |
| Atp2b4   | Cap2          | Arhgap4       | Ankrd33b      | Cacna1h  | Bex2          |
| Bin2     | Ccdc88c       | Arhgap9       | Anxa5         | Card10   | Bin1          |
| Btk      | Ccnd2         | Arhgef39      | Apbb1         | Ccnjl    | Bmp6          |
| Car2     | Cst7          | Arhgef6       | Apbb2         | Cd248    | Cald1         |
| Ccdc92b  | D3Ert751e     | Arid5a        | Apfp2         | Cdkn2b   | Camk2d        |
| Ccl3     | Dhrs11        | Atp13a2       | Arfgap3       | Clip3    | Capn6         |
| Ccl6     | Dhrs9         | Atp8a1        | Arhgef40      | Col1a1   | Ccnd1         |
| Ccl9     | Diaph1        | BC055324      | Arid5b        | Col5a1   | Cd40          |
| Cd200r1  | Dnph1         | Batf          | Arsa          | Cpeb1    | Cdh2          |
| Cd200r4  | Dtx4          | Bcl11a        | Atf3          | Cryab    | Chrna7        |
| Cd52     | Dyrk2         | Blvrb         | Atp7a         | Cyr61    | Clcf1         |
| Cebpb    | Elac2         | Brinp1        | B3gnt5        | Dcbld1   | Colec12       |
| Cela1    | Eil2          | Cd200r3       | BC028528      | Dmrt3    | Coro2b        |
| Cep70    | Eml2          | Cd53          | Batf3         | Dock5    | Creb3l2       |
| Cited2   | Faap24        | Cd79b         | Bcl6b         | Dock6    | Crip2         |
| Cited4   | Fam169a       | Cebpa         | Bik           | Epb4111  | Crmp1         |
| Clec1b   | Gfra2         | Clec4n        | Bmp1          | Etv5     | Csf1          |
| Clu      | Gtf3c5        | Coq8a         | Cachd1        | Fam46b   | Cttnbp2nl     |
| Coro1a   | Hist1h2br     | Coro2a        | Camsap2       | Fam50a   | Cyp26a1       |
| Csf2rb   | Hk2           | Cox7a1        | Ccdc80        | Finc     | Dab2          |
| Csf2rb2  | Hp            | Csf1r         | Cd24a         | Furin    | Dbn1          |
| Csf3r    | Ier3          | Ctsj          | Cdr2          | Gm2897   | Dchs1         |
| Ctse     | Igfbp5        | Cyp1b1        | Cdr2l         | Gnb1     | Disp2         |
| Cyp26b1  | Il17ra        | Cytip         | Cgnl1         | Hbegf    | Dlc1          |
| Cyth4    | Irs2          | Dennd1c       | Chst7         | Hmox1    | Dll4          |
| Dapp1    | Isoc1         | Dennd2d       | Ckap4         | Igdcc3   | Dpysl3        |
| Def6     | Kcnj5         | Dennd4a       | Cobll1        | Itgav    | Dusp9         |
| Depdc1b  | Kcnk9         | Dnase2a       | Col4a1        | Itgb5    | Dysf          |
| Dnmt3b   | Kctd12        | Dock2         | Col5a2        | Kirrel   | Edn1          |
| Dok2     | Lyl1          | Fam181b       | Colgalt2      | Lamc1    | Efnb2         |
| Dyrk3    | Map3k5        | Fam189a2      | Copz2         | Lgr6     | Enc1          |
| E2f2     | Mdga1         | Fam46a        | Cracr2b       | Loxl4    | Epha2         |
| Emilin2  | Mgst2         | Fdxr          | Creb3         | Lrrn2    | Erbp2         |
| Epb41    | Micall2       | Fyb           | Crip1         | Ltbp4    | Ermp1         |
| Epb42    | Mknk1         | Gabarapl1     | Crybg3        | Ly75     | Etv4          |
| Epha7    | Mrvi1         | Gimap9        | Csrp2         | Mall     | Fam114a1      |

|               |          |         |          |           |           |
|---------------|----------|---------|----------|-----------|-----------|
| Epor          | Muc13    | Glrx    | Ctsh     | Map6      | Fam163a   |
| Evi2a         | Nap1l2   | Gmfg    | Ctsl     | Mfap2     | Fam57a    |
| Evi2b         | Nbeal2   | Gp5     | Cxcl16   | Mpzl1     | Fbln2     |
| F13a1         | Ninj1    | Gpr84   | Cxx1a    | Myc       | Fbn1      |
| F2rl2         | Nrgn     | Gpsm3   | Cxx1b    | Myh10     | Flrt2     |
| F5            | Nup210   | Gramd1c | Dcaf12l1 | Nav1      | Flt1      |
| Fam109b       | Osgin1   | Gucy1b3 | Dennd5b  | Ncs1      | Fmo1      |
| Fam46c        | Panx1    | Gxylt2  | Dhx57    | Ndst1     | Foxc2     |
| Fcer1g        | Pbk      | Hacd4   | Dlg5     | Nectin1   | Foxf1     |
| Fcgr3         | Phgdh    | Hbq1b   | Dmwd     | Nes       | Fzd4      |
| Fermt3        | Pls1     | Hddc3   | Dok4     | Nexn      | Gap43     |
| Fgl2          | Ppif     | Helb    | Dscr3    | Nhsl1     | Gata4     |
| Flt3l         | Ppp1r14c | Hpgd    | Dse      | Nuak1     | Gjc1      |
| Fmnl1         | Prkcd    | Hpn     | Dusp22   | Nup62cl   | Glipr2    |
| Fut8          | Ptpre    | Igsf6   | Ece1     | Nus1      | Gprc5a    |
| Gata1         | Ptprj    | Il12rb2 | Edil3    | P2ry2     | H2afy2    |
| Gfi1          | Rab27b   | Il15    | Efna4    | P4ha3     | Hand1     |
| Gfi1b         | Rap1gap2 | Il1b    | Eml1     | Pald      | Hip1r     |
| Gna15         | Rbm38    | Il6ra   | Epn2     | Pcdh7     | Hist2h3c1 |
| Gnaz          | Reep6    | Irak3   | Eva1c    | Pcdhga9   | Hoxb6     |
| Grap2         | Rnf150   | Irgam   | Ext1     | Phlda1    | Hoxb7     |
| Gse1          | Rreb1    | Kcnn4   | F8       | Pitx2     | Hspg2     |
| Gucy1a3       | Samd14   | Klk8    | Fam107a  | Pkdcc     | Iifo2     |
| Gypa          | Sema4d   | Lgals3  | Fam43a   | Plxna2    | Igf2      |
| Gypc          | Slc16a6  | Lgr5    | Farp1    | Pmp22     | Igfbp3    |
| Hba-x         | Slc24a3  | Lmo2    | Fermt2   | Prr5      | Il17rd    |
| Hbb-bh1       | Slc25a10 | Lrrc25  | Fgd6     | Ptms      | Itga3     |
| Hbb-y         | Slco4a1  | Lrrc34  | Fkbp14   | Ptprf     | Itpr3     |
| Hcls1         | Smox     | Lst1    | Flnb     | Rasl11b   | Kank1     |
| Hist2h3c2     | Smyd1    | Ly6e    | Flt4     | Rgs5      | Kcnh2     |
| Hoxd1         | Spry1    | Man2b1  | Fndc3b   | Shank3    | Kctd12b   |
| I830077J02Rik | Sptb     | Matk    | Frdm4a   | Shisa4    | Kctd17    |
| Ifitm1        | Srl      | Mef2c   | Fstl1    | Shroom2   | Kdelr3    |
| Ikzf1         | Steap3   | Mettl18 | Fxyd6    | Slc7a1    | Kif26a    |
| Ikzf2         | Ston2    | Mfng    | Gas6     | Smtn      | Krt19     |
| Il18rap       | Tfap4    | Mfsd6   | Gata6    | Sparc     | Lama1     |
| Inpp5d        | Tfrc     | Mt1     | Gbp4     | Specc1    | Lama4     |
| Itga2b        | Tgfb1    | Myo1g   | Gdpd5    | Spon2     | Lamb1     |
| Itga4         | Tmem163  | Naaa    | Gja4     | Ston1     | Lhfp      |
| Itgb2         | Tnfaip8  | Naga    | Glp1r    | Sulf2     | Lrp1      |
| Itgb3         | Trim58   | Nckap1l | Gm20716  | Synpo     | Map1b     |
| Kcnj2         | Tsc1     | Ncoa4   | Gm266    | Tgfb1i1   | Mb21d2    |
| Klf1          | Tspoap1  | Nfkbid  | Gm2a     | Tgfb1     | Mcam      |
| Laptm5        | Ttyh2    | Nme3    | Gng2     | Tnfrsf12a | Mcc       |
| Lcp2          | Wdr89    | Nr4a2   | Gngt2    | Tpbp      | Meis2     |
| Lgals9        | Zbtb16   | Nrtn    | Gpm6a    | Trib1     | Mical2    |
| Lilr4b        |          | Nxpe5   | Gpm6b    | Tubb6     | Mmp15     |
| Lilrb4a       |          | Orai2   | Gpr19    | Txn2      | Msi1      |
| Lrmp          |          | P2ry13  | Grrp1    | Txndc5    | Msx1      |
| Lyve1         |          | P2ry14  | Hand2    | Ube2ql1   | Mxra7     |
| Lyz2          |          | Pak1    | Hecw2    | Vgf       | Myadm     |
| Madd          |          | Pde3b   | Hey2     | Wnt11     | Myo1b     |
| Mamdc2        |          | Pdk3    | Hip1     | Yap1      | Myof      |
| Map7          |          | Pex7    | Hoxb3    |           | Nhsl2     |
| Mc5r          |          | Pkfb4   | Hoxb9    |           | Nid1      |
| Mctp1         |          | Pglyrp1 | Hspa12a  |           | Nkx2-5    |
| Mdm1          |          | Pglyrp2 | Hyal2    |           | Nos3      |
| Med12l        |          | Pik3cg  | Icam2    |           | Notch4    |

|          |  |           |          |  |          |
|----------|--|-----------|----------|--|----------|
| Meis1    |  | Pik3r5    | Id3      |  | Nova2    |
| Mfsd2b   |  | Plcb2     | Jade2    |  | Npdc1    |
| Mgst3    |  | Plcl2     | Klh13    |  | Nrp2     |
| Mmrn1    |  | Pnpla7    | Lama5    |  | Osbpl10  |
| Mpl      |  | Ppfibp2   | Lgals1   |  | P4ha2    |
| Mpo      |  | Procr     | Lifr     |  | Palm     |
| Ms4a6d   |  | Psemb10   | Lonrf3   |  | Parva    |
| Myb      |  | Ptprc     | Ly6a     |  | Parvb    |
| Mycn     |  | Pygl      | Ly6c1    |  | Pcdh1    |
| Myo1f    |  | Pygm      | Maff     |  | Pcdh12   |
| Myom1    |  | Qprt      | Magel2   |  | Pcdhgc3  |
| Ncf1     |  | Rab17     | Magi3    |  | Pcolce   |
| Ncf2     |  | Rab37     | Map4     |  | Pdlim3   |
| Neurl3   |  | Rac2      | Mapk12   |  | Peg3     |
| Nfe2     |  | Rasa4     | Mbnl3    |  | Phldb2   |
| Nmnat3   |  | Rasgef1b  | Mdfic    |  | Pi16     |
| Nrip3    |  | Rbm43     | Mecom    |  | Plagl1   |
| Nrros    |  | Rbp1      | Mest     |  | Plat     |
| Nupr1    |  | Ret       | Mogat2   |  | Plcd1    |
| Olr1     |  | Rgs14     | Msrb3    |  | Plcd3    |
| P2rx1    |  | Rhag      | Myo1c    |  | Plk3     |
| P2ry1    |  | Rhof      | Naalad2  |  | Ppp1r14a |
| Paqr7    |  | Rnase6    | Nagk     |  | Prickle2 |
| Pdzk1ip1 |  | Rnf130    | Nckap1   |  | Prss12   |
| Perp     |  | Rnf141    | Nectin2  |  | Pxdc1    |
| Pik3ap1  |  | S100a1    | Neo1     |  | Rcn3     |
| Pik3cd   |  | S100a4    | Notch1   |  | Rhoc     |
| Pim2     |  | Samsn1    | Npr1     |  | Rhou     |
| Pla2g4a  |  | Satb1     | Nr2f2    |  | Rtl1     |
| Plcg2    |  | Scn11a    | Nr5a2    |  | Rusc2    |
| Plek     |  | Sec11c    | Nrk      |  | S100a11  |
| Plscr1   |  | Sell      | Oit3     |  | S100a16  |
| Pnpo     |  | Selplg    | Pald1    |  | Samd4    |
| Prkca    |  | Serf1     | Parp8    |  | Samd5    |
| Prkcq    |  | Serpib6b  | Pcdhga11 |  | Scarf2   |
| Prrt4    |  | Sesn1     | Pde1b    |  | Schip1   |
| Ptafr    |  | Setbp1    | Pdzd2    |  | Scpep1   |
| Ptgs1    |  | Skap2     | Pea15a   |  | Sema3e   |
| Ptk2b    |  | Slc24a5   | Phldb1   |  | Sema3f   |
| Ptp4a3   |  | Slc2a3    | Pkp2     |  | Serpine1 |
| Ptpn6    |  | Slc39a8   | Pld2     |  | Sox7     |
| Ptpn7    |  | Sord      | Plekhh1  |  | Sparcl1  |
| Rab27a   |  | Spn       | Plekho1  |  | Spats2l  |
| Rab38    |  | Sprr2a2   | Pipp1    |  | St3gal5  |
| Rasgrp2  |  | Sprr2a3   | Prkch    |  | Stab1    |
| Rbm24    |  | St8sia4   | Ptch2    |  | Steap2   |
| Rcc2     |  | Steap4    | Ptpm     |  | Tagln    |
| Reln     |  | Stk26     | Rab31    |  | Tbx20    |
| Rgs10    |  | Syce2     | Ralb     |  | Tcf7l1   |
| Rgs18    |  | Syk       | Ramp2    |  | Tead1    |
| Rpia     |  | Sytl5     | Rapgef5  |  | Tgfa     |
| Runx1    |  | Tbc1d10c  | Raph1    |  | Thbd     |
| Sash3    |  | Tbxas1    | Rara     |  | Timp1    |
| Selenbp1 |  | Tcp11l2   | Rcan3    |  | Timp2    |
| Selp     |  | Tdrp      | Reck     |  | Tinagl1  |
| Serpib1a |  | Tmod1     | Rgmb     |  | Tjp1     |
| Sh3bp1   |  | Tnfaip8l2 | Rhddf2   |  | Tmem121  |
| Sla      |  | Tnni2     | Rhpn2    |  | Tnc      |

|          |  |         |           |  |         |
|----------|--|---------|-----------|--|---------|
| Slc2     |  | Tom11   | Rilp1     |  | Tnfaip1 |
| Slc16a10 |  | Trim10  | Rims2     |  | Tns1    |
| Slc4a1   |  | Trim14  | Ripply3   |  | Tox2    |
| Slc6a9   |  | Trpv2   | Rnf165    |  | Ttc9    |
| Slc7a8   |  | Tspan8  | Rps6ka2   |  | Unc5b   |
| Slfn2    |  | Ttc39b  | Sash1     |  | Zfp462  |
| Smagp    |  | Ttc7    | Sdc3      |  | Zim1    |
| Smim1    |  | Uba7    | Sdpr      |  |         |
| Snca     |  | Unc13d  | Sec24d    |  |         |
| Spi1     |  | Unc93b1 | Sema4c    |  |         |
| Spp1     |  | Wdfy4   | Sema6a    |  |         |
| Spta1    |  | Wnt2    | Sept10    |  |         |
| Srgn     |  |         | Serpina3i |  |         |
| Stat4    |  |         | Serpib9b  |  |         |
| Susd1    |  |         | Serpinf1  |  |         |
| Susd3    |  |         | Sfxn3     |  |         |
| Syng1    |  |         | Sh3bp4    |  |         |
| Tgm1     |  |         | Sh3bp5    |  |         |
| Tmem229b |  |         | Sh3gl3    |  |         |
| Tmem71   |  |         | Sh3pxd2a  |  |         |
| Tnik     |  |         | Sipa1l2   |  |         |
| Traf3ip3 |  |         | Slc16a2   |  |         |
| Trem12   |  |         | Slc1a2    |  |         |
| Tspan32  |  |         | Slc26a10  |  |         |
| Tuba4a   |  |         | Slc37a3   |  |         |
| Tuba8    |  |         | Slc5a3    |  |         |
| Tubb1    |  |         | Smarca1   |  |         |
| Tyrobp   |  |         | Sorbs1    |  |         |
| Ubash3a  |  |         | Sorbs3    |  |         |
| Unc119   |  |         | Spats2    |  |         |
| Vav1     |  |         | Steap1    |  |         |
| Was      |  |         | Stmn2     |  |         |
|          |  |         | Stn1      |  |         |
|          |  |         | Stx3      |  |         |
|          |  |         | Sulf1     |  |         |
|          |  |         | Sumo3     |  |         |
|          |  |         | Syne2     |  |         |
|          |  |         | Tanc1     |  |         |
|          |  |         | Tcaf1     |  |         |
|          |  |         | Tceal9    |  |         |
|          |  |         | Tead4     |  |         |
|          |  |         | Tek       |  |         |
|          |  |         | Tgfbr3    |  |         |
|          |  |         | Tm6sf1    |  |         |
|          |  |         | Tmem100   |  |         |
|          |  |         | Tmem2     |  |         |
|          |  |         | Tmem204   |  |         |
|          |  |         | Tmem88    |  |         |
|          |  |         | Tmem98    |  |         |
|          |  |         | Tmsb10    |  |         |
|          |  |         | Tnfaip8l1 |  |         |
|          |  |         | Tnfaip8l3 |  |         |
|          |  |         | Tnks1bp1  |  |         |
|          |  |         | Tns2      |  |         |
|          |  |         | Trio      |  |         |
|          |  |         | Tro       |  |         |
|          |  |         | Tulp4     |  |         |
|          |  |         | Tyro3     |  |         |

|  |  |  |        |  |  |
|--|--|--|--------|--|--|
|  |  |  | Ushbp1 |  |  |
|  |  |  | Usp29  |  |  |
|  |  |  | Vegfa  |  |  |
|  |  |  | Vsig2  |  |  |
|  |  |  | Yes1   |  |  |
|  |  |  | Ypel2  |  |  |
|  |  |  | Zeb1   |  |  |
|  |  |  | Zfp423 |  |  |
|  |  |  | Zfp532 |  |  |

**Supplementary Table 5** Genes de-regulated in HE2-HP transition, G11 – upregulated in both, G12 – upregulated in - dox, G21 – upregulated in + dox, G02 – downregulated in –dox, G20 – downregulated in +dox, G00 downregulated in both

| G11           | G12           | G21       | G02        | G20           | G00           |
|---------------|---------------|-----------|------------|---------------|---------------|
| 6030468B19Rik | 1110008P14Rik | Abhd15    | Abhd6      | 1700020L24Rik | 1810011O10Rik |
| Ache          | 1300017J02Rik | Adam8     | Ablim1     | 2200002D01Rik | Abi3          |
| Acp5          | Abcb10        | Adamts3   | Ackr1      | 2900026A02Rik | Acer2         |
| Acss2         | Abcb6         | Adgrg1    | Afap111    | 4930402H24Rik | Acsf2         |
| Adap1         | Abcg1         | Adgrg3    | Anapc2     | 4930412O13Rik | Acvr1         |
| Adgre1        | Acsl1         | Adssl1    | Ankrd33b   | 9230102O04Rik | Acvr11        |
| Adgre4        | Acss1         | Ank3      | Apln       | 9430020K01Rik | Adam12        |
| Ajap1         | Adcy7         | Anp32e    | Apoe       | A430105I19Rik | Adam15        |
| Alas2         | Adgrg5        | Arhgap11a | Bahcc1     | A4galt        | Adam19        |
| Alox12        | Adra2b        | Arhgap45  | Bcl3       | AU021092      | Adamts1       |
| Alox5         | Asb1          | Arhgef39  | Bcl9l      | Abca1         | Adarb1        |
| Amd2          | B3gnt8        | Art4      | Bmper      | Abhd17a       | Adcy4         |
| Angpt1        | Bin2          | Asf1b     | Btbd3      | Adrb3         | Adgra2        |
| Ank1          | Blvb          | Atp2b4    | Cables1    | Agri          | Adgre5        |
| Apobec1       | Btn1a1        | Aunip     | Calr3      | Ahrr          | Adgrf5        |
| Aqp8          | Capn1         | Aurka     | Capn5      | Ajuba         | Adgrl2        |
| Arhgap30      | Ccnb1ip1      | B4galnt1  | Car8       | Akr1cl        | Adgrl4        |
| Arhgap4       | Ccl2          | Blm       | Card10     | Ankrd46       | Afdn          |
| Arhgap9       | Cd28          | C2        | Carhsp1    | Ano10         | Agpat4        |
| Atp2a3        | Cd86          | C3ar1     | Cd81       | Anpep         | Akap12        |
| Bcl2a1b       | Cda           | Camkk1    | Cdc42bpb   | Apbb1         | Akap2         |
| Bcl2a1d       | Cebpa         | Caprin2   | Cdkn1a     | Aplp2         | Als2cl        |
| Bmp2k         | Cenpp         | Cbfa2t3   | Clip1      | Apol10b       | Amotl1        |
| Btk           | Cep70         | Ccne1     | Cmtm8      | Aqp11         | Amotl2        |
| Capn3         | Cgn           | Cd244     | Cnm2       | Arhgap28      | Angptl8       |
| Car1          | Chchd10       | Cd300ld   | Cobll1     | Arhgap44      | Ankrd50       |
| Car2          | Colec11       | Cd300lf   | Cplx2      | Arhgap8       | Anxa2         |
| Card9         | Coro1a        | Cdadcl1   | Cpt1c      | Arntl2        | Anxa5         |
| Ccdc88b       | Coro2a        | Cdca8     | Cryab      | Asap2         | Anxa6         |
| Ccdc92b       | Ctsc          | Cela1     | Csgalnact1 | Atp7a         | Apbb2         |
| Ccl3          | Cytip         | Cenpl     | Ctla2a     | Avpi1         | Apccdd1       |
| Ccl4          | D030056L22Rik | Cenpu     | Ctxn1      | B3galnt1      | Aplnr         |
| Ccl6          | Dapk2         | Cit       | Cyp26a1    | B9d1          | Apold1        |
| Ccl9          | Dennd2c       | Ckb       | Cyp26b1    | Bcam          | App           |
| Ccr1          | Depdc1a       | Clec1b    | Dcaf12l1   | Bend7         | Aqp1          |
| Ccr2          | Dhrs11        | Cmah      | Dcbld1     | Bex1          | Arap3         |
| Cd14          | Diras2        | Cox6b2    | Ddah2      | Bmx           | Arhgap27      |
| Cd180         | Efnb1         | Csf3r     | Ddit4      | C1qtnf9       | Arhgap31      |
| Cd226         | Emb           | Cxcr2     | Dennd2a    | C77370        | Arhgef12      |
| Cd300a        | Eml2          | Dclre1b   | Dock1      | Camk2d        | Arhgef15      |
| Cd300c2       | Enpp1         | Diaph1    | Dusp4      | Casp4         | Arhgef17      |

|            |            |           |           |          |               |
|------------|------------|-----------|-----------|----------|---------------|
| Cd300lb    | F10        | Dna2      | Dync2li1  | Ccdc184  | Arhgef28      |
| Cd52       | Fam110c    | Dok2      | Ecm1      | Ccdc85a  | Arhgef3       |
| Cd69       | Fam117a    | Dok3      | Erf       | Cd59b    | Arhgef5       |
| Cdc25b     | Fam169b    | Dtl       | Ets2      | Cd82     | Arid5b        |
| Cenpk      | Fancf      | Dtx4      | Exoc3l4   | Cdkl1    | Armcx1        |
| Cercam     | Fech       | E2f2      | Fam71f1   | Ceacam1  | Armcx2        |
| Cited2     | Fmnl1      | E2f8      | Fchsd2    | Chrna7   | Armcx4        |
| Cited4     | Galnt10    | F13a1     | Fkbp1a    | Clcf1    | Armcx6        |
| Clec4d     | Gan        | Fam105a   | Fscn1     | Cnksr1   | Arsa          |
| Clec4n     | Gm10509    | Fam50a    | Furin     | Ctnnb1   | Asah2         |
| Clec5a     | Gtf2a2     | Fcgr2b    | Fzd10     | Ctsf     | Asb4          |
| Cnst       | H2afz      | Fcgr4     | Gchfr     | Ctsh     | Atf3          |
| Cpne7      | Hacd4      | Gas7      | Gem       | Cxcr4    | Atp6v0e2      |
| Cpox       | Hexim2     | Glrx5     | Gfi1      | Cyb561   | Atp9a         |
| Csf1r      | Hist2h2aa2 | Gpc4      | Ghr       | Cyp1b1   | BC028528      |
| Csf2rb     | Ifitm1     | Gria3     | Glp1r     | Cyp7b1   | Bach2         |
| Csf2rb2    | Ifitm6     | Gse1      | Gna11     | Cyr61    | Bcar1         |
| Csgalnact2 | Igsf3      | Gtf3c5    | Gpx3      | Dab2ip   | Bcar3         |
| Cst7       | Inafm2     | Gypc      | Gpx7      | Dennd3   | Bcl6b         |
| Cx3cr1     | Ints6l     | H2-T24    | Gsta4     | Dgkh     | Bgn           |
| Cyp4x1     | Irak3      | Hbq1a     | Hapln1    | Dgkk     | Bin1          |
| Dapp1      | Itga4      | Hexim1    | Hist1h2br | Dhh      | Bmp1          |
| Dock8      | Kalrn      | Hist1h1a  | Hmbox1    | Diaph2   | Bmp2          |
| Dpf3       | Kcnn4      | Hist1h1b  | Hmga2     | Dmd      | Bmp4          |
| Dusp10     | Lgals3     | Hist1h2bh | Hmgn5     | Dmwd     | Bmp6          |
| Eil2       | Lira6      | Htra3     | Hmox1     | Dppa4    | C130074G19Rik |
| Emilin2    | Lims1      | Icam4     | Hoxb6     | Dusp1    | C1qtnf6       |
| Epb42      | Lpcat2     | Ifi30     | Ica1      | Dusp26   | Cachd1        |
| Epor       | Mapk6      | Ikzf1     | Igf1      | Dusp6    | Calcr1        |
| Esco2      | Mbnl1      | Il17ra    | Igfbp5    | Dusp9    | Cald1         |
| Evi2a      | Mcf2l      | Il18rap   | Il2rg     | Efna4    | Camsap2       |
| F2rl2      | Milr1      | Itga2b    | Il4ra     | Emp2     | Caskin2       |
| Fam109b    | Mllt3      | Itgb3     | Impdh1    | Enpp2    | Cav1          |
| Fam46c     | Mmp8       | Kcnj5     | Inpp5a    | Entpd1   | Cav2          |
| Fam65c     | Mpc1       | Kctd12    | Kank3     | Eogt     | Ccdc60        |
| Fbxo48     | Msrb1      | Kif14     | Ldlrap1   | Epb4113  | Ccdc85b       |
| Fcer1g     | Myo1g      | Klhl30    | Lgals9    | Eva1a    | Ccm2l         |
| Fcgr3      | Nadk2      | Lat       | Lhfp      | Ezh1     | Ccnd1         |
| Fermt3     | Narf       | Lilr4b    | Lima1     | F2r1     | Cd109         |
| Fgd3       | Ncoa4      | Lpin2     | Loxl2     | Fam107a  | Cd200         |
| Fgl2       | Ninl       | Lst1      | Lrp5      | Fam124b  | Cd276         |
| Fyb        | Nt5c3      | Mc5r      | Lrrc8a    | Fam189a2 | Cd38          |
| G6b        | Olfm1      | Mcm10     | Lrrn2     | Fam198b  | Cd40          |
| Gata1      | Ormdl1     | Mdm1      | Mapk7     | Fam234a  | Cd59a         |
| Gfi1b      | Otub2      | Med12l    | Mapre2    | Fbp1     | Cd93          |
| Gja6       | P2ry13     | Mki67     | Mapre3    | Filip1l  | Cdc42ep1      |
| Glipr1     | Pak1       | Mkl1      | Mast4     | Fkbp14   | Cdh2          |
| Gm21975    | Pdlim4     | Mknk1     | Me1       | Fzd6     | Cdh5          |
| Gnaz       | Penk       | Mlec      | Mfsd13a   | Galnt11  | Cdkn1c        |
| Gp1ba      | Pgm2l1     | Mns1      | Mpzl1     | Galnt18  | Cdr2l         |
| Gp1bb      | Pip5k1b    | Mpeg1     | Mrps6     | Gdpd1    | Cgnl1         |
| Gp5        | Pla2g7     | Mpl       | Mtss1l    | Gimap9   | Chd3          |
| Gp6        | Plac8      | Mpo       | Myo1c     | Gnai1    | Chn1          |
| Gp9        | Ppp3cc     | Mrpl12    | Nav1      | Gpm6b    | Chst2         |
| Gpr141     | Ptprc      | Mrv1      | Nckap5l   | Gpr173   | Chst7         |
| Grap2      | Pycr1      | Mtfr2     | Ndst1     | Gprc5b   | Ckap4         |
| Grtp1      | Pygl       | Mthfd2    | Nefl      | Grb7     | Cldn5         |
| Gucy1a3    | Rab30      | Mx1       | Nes       | Grk5     | Clec14a       |

|               |           |          |          |          |               |
|---------------|-----------|----------|----------|----------|---------------|
| Gucy1b3       | Rab3il1   | Myb      | Nhs      | Hecw2    | Clic6         |
| Gypa          | Rab44     | Nap1l2   | Nlrc3    | Hhat     | Cmtm3         |
| Hba-a2        | Reep1     | Nbeal2   | Nuak1    | Hip1r    | Cnn3          |
| Hba-x         | Rspo4     | Neil3    | P3h4     | Hoxd1    | Col18a1       |
| Hbb-bh1       | Selenbp1  | Nomo1    | Pcdhga7  | Ift122   | Col4a1        |
| Hbb-bh2       | Sla2      | Nrgn     | Pcdhga9  | Igfbp3   | Col4a2        |
| Hbb-bs        | Slc30a10  | Olr1     | Pcdhgb5  | Il17rc   | Col5a2        |
| Hbb-y         | Slc35d3   | P2rx1    | Pcnx     | Il17rd   | Colec12       |
| Hbq1b         | Slc44a1   | Pbk      | Peak1    | Iqcg     | Coro2b        |
| Hck           | Slc9a3r1  | Pbx1     | Phldb1   | Kank1    | Cped1         |
| Hemgn         | Sfn14     | Pdcd4    | Plec     | Kcnp3    | Cpne8         |
| Hipk2         | Spaca9    | Pls1     | Plekhb2  | Lgals2   | Cracr2b       |
| Hmbs          | Spi1      | Ppp3r1   | Plekh1   | Lgmn     | Creb3l2       |
| Hp            | Spn       | Prkar2b  | Plekh3   | Lgr5     | Crip1         |
| Hsd3b1        | Spp12a    | Prkd     | Polg     | Lgr6     | Crip2         |
| I830077J02Rik | Ssx2ip    | Ptpn13   | Ppfibp1  | Lhfp12   | Crmp1         |
| Ifi202b       | St3gal6   | Ptpn7    | Ppp1r13b | Lims2    | Csf1          |
| Igsf6         | Stx11     | Rab27b   | Ppp1r14a | Lipa     | Csrp2         |
| Il10ra        | Susd3     | Rab38    | Prkd2    | Litaf    | Ctsl          |
| Il1r2         | Syk       | Rad51    | Ptk7     | Lmbr1l   | Ctnbp2nl      |
| Irf8          | Syne4     | Rad54l   | Ptms     | Lpar6    | Cx3cl1        |
| Irs2          | Tbxas1    | Rap1gap2 | Rab13    | Lrfr4    | Cxcl1         |
| Irgam         | Tceanc    | Rasgrp2  | Ramp3    | Lsr      | Cxcl16        |
| Irgb2         | Tec       | Rasl11a  | Rapgef4  | Ltb      | Cxx1a         |
| Kcna3         | Tex9      | Rbm38    | Rarg     | Ly6h     | Cxx1b         |
| Kel           | Themis2   | Rrm2     | Rcn3     | Mageh1   | Cxx1c         |
| Khk           | Tmcc2     | Slamf1   | Ripk3    | Magi3    | Cyp1a1        |
| Klf1          | Tmem14c   | Slc11a1  | Rnf157   | Mal      | Cyp2j6        |
| Kn1           | Tmem184a  | Slc16a3  | Rprm     | Mall     | Cyyr1         |
| Lair1         | Tmem56    | Slc24a3  | Rrbp1    | Map4k2   | D930048N14Rik |
| Lilrb4a       | Tmem60    | Slc6a20a | Rtkn     | Map4k5   | Dab2          |
| Lpl           | Tnf       | Slc7a11  | S100a11  | Mapk3    | Dbn1          |
| Lrrc25        | Tnfaip8l2 | Slc7a5   | Sall3    | Marcks   | Dchs1         |
| Ltbp2         | Tom1l1    | Smc2     | Sema6b   | Marveld2 | Ddit4l        |
| Ly6e          | Tpd52     | Spns2    | Sept7    | Mb21d2   | Dennd5b       |
| Ly6g6f        | Traf3ip3  | Srgap3   | Slc16a2  | Mdfic    | Dhx57         |
| Mamdc2        | Trem1     | Srsf4    | Slc1a2   | Meis2    | Disc1         |
| Matn1         | Trib3     | Syce2    | Slc27a3  | Mesdc1   | Dlc1          |
| Mbp           | Trim14    | Syne3    | Slc30a3  | Mfhas1   | Dlg5          |
| Mfsd2b        | Ttc39a    | Tango2   | Slc5a3   | Mocos    | Dll4          |
| Micall2       | Tuft1     | Taok3    | Slco3a1  | Msrb3    | Dnajb5        |
| Mmp19         | Uba7      | Tbc1d31  | Smtn     | Mtch1    | Dock4         |
| Mob1b         | Ube2l6    | Tdrd5    | Smurf1   | Myo1e    | Dock6         |
| Mpp2          | Unc13d    | Tgfb1    | Sox12    | Naalad2  | Dock9         |
| Ms4a6b        | Unc93b1   | Ticrr    | Spry2    | Nab2     | Dok4          |
| Mt1           | Urod      | Tnfaip8  | Sptan1   | Naip5    | Dpysl2        |
| Mt2           | Uros      | Tnik     | Sptbn1   | Naip6    | Dpysl3        |
| Muc13         | Usp51     | Tra2b    | Srpx2    | Nckap1   | Dst           |
| Mylk3         | Vwce      | Ttyh2    | Ssfa2    | Nfkb2    | Dusp22        |
| Myo1f         | Vwf       | Txn2     | Stox2    | Nfkbie   | Dysf          |
| Myom1         | Zfp534    | Ugt1a7c  | Stxbp1   | Nmnat2   | Ebf1          |
| Ncf1          | Zfp758    | Uhrf1    | Sulf2    | Nod1     | Ece1          |
| Ncf4          | Zfp808    | Ung      | Tacc2    | Nr2f6    | Eccscr        |
| Nckap1l       | Zfp979    | Zfand4   | Tbkbp1   | Nr4a1    | Edil3         |
| Nfam1         | Zfp984    |          | Tcf7l2   | Nradd    | Edn1          |
| Nfe2          |           |          | Thsd7a   | Oaz2     | Efna1         |
| Nmnat3        |           |          | Tll1     | Osbp10   | Efnb2         |
| Npy           |           |          | Tmcc3    | Osbp15   | Egfl7         |



|          |  |  |           |           |          |
|----------|--|--|-----------|-----------|----------|
| Nrip3    |  |  | Tmem108   | Osmr      | Ehd2     |
| Nrros    |  |  | Tmtc2     | P2rx7     | Elk3     |
| Nt5e     |  |  | Tnfrsf12a | Pam       | Elmo1    |
| P2rx5    |  |  | Tnrc18    | Parvb     | Emcn     |
| P2ry14   |  |  | Trim26    | Pcdh18    | Eml1     |
| Paqr7    |  |  | Tspan14   | Pde9a     | Enc1     |
| Pde5a    |  |  | Tspan7    | Pdgfa     | Endod1   |
| Perp     |  |  | Tubg2     | Pdk4      | Eng      |
| Pf4      |  |  | Uaca      | Pdzd2     | Enho     |
| Pkfb4    |  |  | Ucn       | Pik3ip1   | Epas1    |
| Phf11b   |  |  | Vamp5     | Pkd2      | Epha2    |
| Pik3ap1  |  |  | Vwa7      | Pla2g16   | Ephb4    |
| Pik3cd   |  |  | Wipf3     | Plcd1     | Epn2     |
| Pim1     |  |  | Wwc2      | Plcd3     | Erbp2    |
| Pirb     |  |  | Zcchc24   | Pld2      | Erg      |
| Pkd1l3   |  |  | Zfp467    | Plod1     | Esam     |
| Pla2g4a  |  |  | Zfp516    | Plpp2     | Ets1     |
| Plek     |  |  | Zfp521    | Ppm1j     | Evi5     |
| Pnpo     |  |  | Zmynd15   | Praf2     | Exoc3l   |
| Ppp1r14c |  |  |           | Prcp      | Ext1     |
| Prkca    |  |  |           | Prkcdp    | F11r     |
| Prkcq    |  |  |           | Prom1     | Fam114a1 |
| Prkg1    |  |  |           | Prss12    | Fam129b  |
| Proser2  |  |  |           | Ptchd1    | Fam149a  |
| Prtm3    |  |  |           | Rab34     | Fam163a  |
| Pstpip2  |  |  |           | Ralgds    | Fam171a1 |
| Ptafr    |  |  |           | Rassf9    | Fam171a2 |
| Ptger3   |  |  |           | Rcan1     | Fam181b  |
| Ptpnj    |  |  |           | Rcan3     | Fam188b  |
| Rab37    |  |  |           | Rdh10     | Fam219a  |
| Rac2     |  |  |           | Ret       | Fam43a   |
| Rap1b    |  |  |           | Rgmb      | Fam57a   |
| Reep6    |  |  |           | Rnd1      | Farp1    |
| Reln     |  |  |           | Rnf122    | Fat4     |
| Rgs1     |  |  |           | Rnf185    | Fblim1   |
| Rgs10    |  |  |           | Rps6ka4   | Fbln1    |
| Rgs18    |  |  |           | Rusc2     | Fbn1     |
| Rnf128   |  |  |           | Samd12    | Fbn2     |
| Rpia     |  |  |           | Scarf2    | Fbxl7    |
| Rps27rt  |  |  |           | Schip1    | Fbxo10   |
| Samd14   |  |  |           | Scn11a    | Fermt2   |
| Sema4d   |  |  |           | Selenom   | Fgd5     |
| Siglecf  |  |  |           | Selenop   | Fgfr1    |
| Sla      |  |  |           | Sema3a    | Figl2    |
| Slc14a1  |  |  |           | Sema7a    | Fkbp10   |
| Slc16a10 |  |  |           | Sept10    | Flnb     |
| Slc25a37 |  |  |           | Serpinb6a | Flrt2    |
| Slc2a6   |  |  |           | Serpinf1  | Flrt3    |
| Slc38a5  |  |  |           | Serping1  | Flt1     |
| Slc39a8  |  |  |           | Sfxn3     | Flt4     |
| Slc6a9   |  |  |           | Sgcd      | Fmn13    |
| Smim1    |  |  |           | Shc2      | Fmo1     |
| Smox     |  |  |           | Slc12a2   | Fn1      |
| Snca     |  |  |           | Slc16a9   | Fndc3b   |
| Soat2    |  |  |           | Slc2a12   | Frdm6    |
| Spef1    |  |  |           | Slc35g3   | Fstl1    |
| Spns3    |  |  |           | Slc7a7    | Fxyd5    |
| Spp1     |  |  |           | Smad7     | Fzd1     |

|          |  |  |  |            |         |
|----------|--|--|--|------------|---------|
| Spta1    |  |  |  | Smpdl3a    | Gabbr1  |
| Sptb     |  |  |  | Smpdl3b    | Gad2    |
| Srgn     |  |  |  | Smtnl1     | Gap43   |
| Steap3   |  |  |  | Sncaip     | Gas6    |
| Ston2    |  |  |  | Snrk       | Gata3   |
| Syt16    |  |  |  | Snx21      | Gata4   |
| Tfrc     |  |  |  | Socs3      | Gata6   |
| Thbs1    |  |  |  | Sorcs2     | Gdpd5   |
| Tmem40   |  |  |  | Sp100      | Gimap1  |
| Tmod1    |  |  |  | Spaca6     | Gimap4  |
| Tnfrsf14 |  |  |  | Spag9      | Gimap5  |
| Tnfsf14  |  |  |  | Spata13    | Gimap6  |
| Tnni1    |  |  |  | Spats2     | Gimap8  |
| Traf5    |  |  |  | Spred3     | Gja4    |
| Trem1    |  |  |  | Spr2a2     | Gja5    |
| Trem2    |  |  |  | Spr2a3     | Gjc1    |
| Trim10   |  |  |  | St6gal1    | Gm13889 |
| Trim58   |  |  |  | St6galnac2 | Gm1673  |
| Tspan32  |  |  |  | Stn1       | Gna12   |
| Tspan33  |  |  |  | Stx3       | Gng11   |
| Tspoap1  |  |  |  | Stx6       | Gngt2   |
| Tuba4a   |  |  |  | Sulf1      | Gpm6a   |
| Tuba8    |  |  |  | Tbc1d9     | Gpr182  |
| Tubb1    |  |  |  | Tes        | Grand1a |
| Tyrobp   |  |  |  | Timd2      | Grap    |
| Ubash3a  |  |  |  | Timp3      | Grasp   |
| Ubash3b  |  |  |  | Tm4sf1     | Greb11  |
| Ufsp1    |  |  |  | Tmem100    | Grrp1   |
| Vav1     |  |  |  | Tmem120b   | H2-Q4   |
| Vsir     |  |  |  | Tmem176a   | H2afy2  |
| Xk       |  |  |  | Tmem254a   | Hand2   |
| Zbtb16   |  |  |  | Tmem255b   | Has2    |
|          |  |  |  | Tmem98     | Hdac7   |
|          |  |  |  | Tnfaip8l1  | Heg1    |
|          |  |  |  | Tnfrsf26   | Hey1    |
|          |  |  |  | Tnnc1      | Hey2    |
|          |  |  |  | Tpbp       | Hid1    |
|          |  |  |  | Tppp3      | Hip1    |
|          |  |  |  | Trp53inp2  | Hmcn1   |
|          |  |  |  | Tspan2     | Hoxb2   |
|          |  |  |  | Tspan6     | Hoxb3   |
|          |  |  |  | Tspan8     | Hoxb4   |
|          |  |  |  | Ttl7       | Hoxb5   |
|          |  |  |  | Tubb2b     | Hoxd4   |
|          |  |  |  | Twist1     | Hoxd8   |
|          |  |  |  | Tyro3      | Hoxd9   |
|          |  |  |  | Uchl1      | Hspa12a |
|          |  |  |  | Unc13b     | Hspa12b |
|          |  |  |  | Usp53      | Hspg2   |
|          |  |  |  | Vegfc      | Hyal1   |
|          |  |  |  | Xbp1       | Hyal2   |
|          |  |  |  | Xxylt1     | Icam1   |
|          |  |  |  | Ypel3      | Icam2   |
|          |  |  |  | Zbtb4      | Id1     |
|          |  |  |  | Zfp185     | Id2     |
|          |  |  |  | Zfp287     | Id3     |
|          |  |  |  | Zfp334     | Ier5l   |
|          |  |  |  | Zfp618     | Ifo2    |

|  |  |  |       |         |
|--|--|--|-------|---------|
|  |  |  | Zfp69 | Igf2    |
|  |  |  | Zic2  | Igfbp4  |
|  |  |  | Znrf1 | Igfbp7  |
|  |  |  |       | Il27ra  |
|  |  |  |       | Il6st   |
|  |  |  |       | Irf2bpl |
|  |  |  |       | Itga1   |
|  |  |  |       | Itga2   |
|  |  |  |       | Itga3   |
|  |  |  |       | Itga5   |
|  |  |  |       | Itga9   |
|  |  |  |       | Itm2c   |
|  |  |  |       | Itpkb   |
|  |  |  |       | Jag2    |
|  |  |  |       | Jup     |
|  |  |  |       | Kank2   |
|  |  |  |       | Kcnk9   |
|  |  |  |       | Kctd12b |
|  |  |  |       | Kctd17  |
|  |  |  |       | Kdr     |
|  |  |  |       | Kif1c   |
|  |  |  |       | Kif26a  |
|  |  |  |       | Kif3c   |
|  |  |  |       | Kirrel  |
|  |  |  |       | Klf2    |
|  |  |  |       | Klf3    |
|  |  |  |       | Klf4    |
|  |  |  |       | Klh13   |
|  |  |  |       | Klh3    |
|  |  |  |       | Klh4    |
|  |  |  |       | Lama4   |
|  |  |  |       | Lama5   |
|  |  |  |       | Lamb1   |
|  |  |  |       | Lamb2   |
|  |  |  |       | Laptm4b |
|  |  |  |       | Large1  |
|  |  |  |       | Lats2   |
|  |  |  |       | Ldb2    |
|  |  |  |       | Lhx6    |
|  |  |  |       | Lifr    |
|  |  |  |       | Limch1  |
|  |  |  |       | Lix1l   |
|  |  |  |       | Lpp     |
|  |  |  |       | Lrp11   |
|  |  |  |       | Lrrc32  |
|  |  |  |       | Ltc4s   |
|  |  |  |       | Luzp1   |
|  |  |  |       | Ly6a    |
|  |  |  |       | Ly6c1   |
|  |  |  |       | Lyve1   |
|  |  |  |       | Madcam1 |
|  |  |  |       | Maff    |
|  |  |  |       | Maged2  |
|  |  |  |       | Magi1   |
|  |  |  |       | Man1c1  |
|  |  |  |       | Map1b   |
|  |  |  |       | Map3k11 |
|  |  |  |       | Map3k3  |

|  |  |  |  |          |
|--|--|--|--|----------|
|  |  |  |  | Map4     |
|  |  |  |  | Map4k3   |
|  |  |  |  | Map4k4   |
|  |  |  |  | Map7d1   |
|  |  |  |  | Mapk11   |
|  |  |  |  | Mapk12   |
|  |  |  |  | Marcksl1 |
|  |  |  |  | Marveld1 |
|  |  |  |  | Mboat2   |
|  |  |  |  | Mcam     |
|  |  |  |  | Mest     |
|  |  |  |  | Mex3d    |
|  |  |  |  | Mfng     |
|  |  |  |  | Mgat4b   |
|  |  |  |  | Mmp11    |
|  |  |  |  | Mmp14    |
|  |  |  |  | Mmp15    |
|  |  |  |  | Mmp2     |
|  |  |  |  | Mmp28    |
|  |  |  |  | Mmrn2    |
|  |  |  |  | Mogat2   |
|  |  |  |  | Mpnd     |
|  |  |  |  | Mrc1     |
|  |  |  |  | Mtus1    |
|  |  |  |  | Mxra7    |
|  |  |  |  | Myct1    |
|  |  |  |  | Myo1b    |
|  |  |  |  | Myzap    |
|  |  |  |  | N4bp3    |
|  |  |  |  | Nav3     |
|  |  |  |  | Nectin2  |
|  |  |  |  | Nedd9    |
|  |  |  |  | Nek6     |
|  |  |  |  | Neo1     |
|  |  |  |  | Nfatc4   |
|  |  |  |  | Nfib     |
|  |  |  |  | Nfkb1    |
|  |  |  |  | Nfkbia   |
|  |  |  |  | Nhsl1    |
|  |  |  |  | Nhsl2    |
|  |  |  |  | Nid1     |
|  |  |  |  | Nid2     |
|  |  |  |  | Nos3     |
|  |  |  |  | Notch1   |
|  |  |  |  | Notch4   |
|  |  |  |  | Nova2    |
|  |  |  |  | Npdc1    |
|  |  |  |  | Npr1     |
|  |  |  |  | Nrarp    |
|  |  |  |  | Nrep     |
|  |  |  |  | Nrp1     |
|  |  |  |  | Nrp2     |
|  |  |  |  | Nts      |
|  |  |  |  | Ocln     |
|  |  |  |  | Oit3     |
|  |  |  |  | Orai1    |
|  |  |  |  | P3h3     |
|  |  |  |  | P4ha2    |

|  |  |  |  |  |          |
|--|--|--|--|--|----------|
|  |  |  |  |  | Pald1    |
|  |  |  |  |  | Palld    |
|  |  |  |  |  | Palm     |
|  |  |  |  |  | Parva    |
|  |  |  |  |  | Pcdh1    |
|  |  |  |  |  | Pcdh12   |
|  |  |  |  |  | Pcdh17   |
|  |  |  |  |  | Pcdh19   |
|  |  |  |  |  | Pcdhb22  |
|  |  |  |  |  | Pcdhga10 |
|  |  |  |  |  | Pcdhga11 |
|  |  |  |  |  | Pcdhgb2  |
|  |  |  |  |  | Pcdhgb6  |
|  |  |  |  |  | Pcdhgb7  |
|  |  |  |  |  | Pcdhgc3  |
|  |  |  |  |  | Pde2a    |
|  |  |  |  |  | Pde4b    |
|  |  |  |  |  | Pdgb     |
|  |  |  |  |  | Pdgd     |
|  |  |  |  |  | Pdia5    |
|  |  |  |  |  | Pdim1    |
|  |  |  |  |  | Pdim3    |
|  |  |  |  |  | Pea15a   |
|  |  |  |  |  | Pecam1   |
|  |  |  |  |  | Peg10    |
|  |  |  |  |  | Peg3     |
|  |  |  |  |  | Phldb2   |
|  |  |  |  |  | Pi16     |
|  |  |  |  |  | Pik3c2b  |
|  |  |  |  |  | Pik3r3   |
|  |  |  |  |  | Pim3     |
|  |  |  |  |  | Pkdcc    |
|  |  |  |  |  | Plac1    |
|  |  |  |  |  | Plagl1   |
|  |  |  |  |  | Plat     |
|  |  |  |  |  | Plcg1    |
|  |  |  |  |  | Plekha1  |
|  |  |  |  |  | Plekhg1  |
|  |  |  |  |  | Plekhg5  |
|  |  |  |  |  | Plekho1  |
|  |  |  |  |  | Plk2     |
|  |  |  |  |  | Plpp1    |
|  |  |  |  |  | Pltp     |
|  |  |  |  |  | Plvap    |
|  |  |  |  |  | Plxnd1   |
|  |  |  |  |  | Ppp1r16b |
|  |  |  |  |  | Prag1    |
|  |  |  |  |  | Prex2    |
|  |  |  |  |  | Prickle3 |
|  |  |  |  |  | Prkch    |
|  |  |  |  |  | Prnd     |
|  |  |  |  |  | Prnp     |
|  |  |  |  |  | Procr    |
|  |  |  |  |  | Prrg3    |
|  |  |  |  |  | Ptpn14   |
|  |  |  |  |  | Ptprb    |
|  |  |  |  |  | Ptprg    |
|  |  |  |  |  | Ptpm     |

|  |  |  |  |  |           |
|--|--|--|--|--|-----------|
|  |  |  |  |  | Ptrf      |
|  |  |  |  |  | Pvr       |
|  |  |  |  |  | Pxdc1     |
|  |  |  |  |  | Pxdn      |
|  |  |  |  |  | Rab11fip3 |
|  |  |  |  |  | Rab11fip5 |
|  |  |  |  |  | Ralb      |
|  |  |  |  |  | Ramp2     |
|  |  |  |  |  | Rapgef3   |
|  |  |  |  |  | Rapgef5   |
|  |  |  |  |  | Rara      |
|  |  |  |  |  | Rasal2    |
|  |  |  |  |  | Rasgrp3   |
|  |  |  |  |  | Rasip1    |
|  |  |  |  |  | Rassf3    |
|  |  |  |  |  | Rbms2     |
|  |  |  |  |  | Rbpms     |
|  |  |  |  |  | Rcctb1    |
|  |  |  |  |  | Reck      |
|  |  |  |  |  | Relb      |
|  |  |  |  |  | Rell1     |
|  |  |  |  |  | Rftn1     |
|  |  |  |  |  | Rgl1      |
|  |  |  |  |  | Rgs16     |
|  |  |  |  |  | Rgs3      |
|  |  |  |  |  | Rhob      |
|  |  |  |  |  | Rhoc      |
|  |  |  |  |  | Rhoj      |
|  |  |  |  |  | Rhou      |
|  |  |  |  |  | Rilpl1    |
|  |  |  |  |  | Rin2      |
|  |  |  |  |  | Ripply3   |
|  |  |  |  |  | Rnf125    |
|  |  |  |  |  | Rnf144a   |
|  |  |  |  |  | Robo4     |
|  |  |  |  |  | Rps27     |
|  |  |  |  |  | Rps6ka2   |
|  |  |  |  |  | Rras      |
|  |  |  |  |  | Rspo3     |
|  |  |  |  |  | S100a16   |
|  |  |  |  |  | S1pr1     |
|  |  |  |  |  | Sall2     |
|  |  |  |  |  | Sash1     |
|  |  |  |  |  | Scarf1    |
|  |  |  |  |  | Scn1b     |
|  |  |  |  |  | Scpep1    |
|  |  |  |  |  | Scrn1     |
|  |  |  |  |  | Sec24d    |
|  |  |  |  |  | Selenon   |
|  |  |  |  |  | Sema3f    |
|  |  |  |  |  | Sema3g    |
|  |  |  |  |  | Sema4c    |
|  |  |  |  |  | Sema6a    |
|  |  |  |  |  | Sema6d    |
|  |  |  |  |  | Serpina3g |
|  |  |  |  |  | Serpina3i |
|  |  |  |  |  | Serpinh9b |
|  |  |  |  |  | Serpinh1  |

|  |  |  |  |  |            |
|--|--|--|--|--|------------|
|  |  |  |  |  | Sesn3      |
|  |  |  |  |  | Sgk1       |
|  |  |  |  |  | Sh3bp4     |
|  |  |  |  |  | Sh3bp5     |
|  |  |  |  |  | Sh3gl3     |
|  |  |  |  |  | Sh3pxd2a   |
|  |  |  |  |  | Sh3pxd2b   |
|  |  |  |  |  | Sh3tc1     |
|  |  |  |  |  | Shank3     |
|  |  |  |  |  | She        |
|  |  |  |  |  | Shroom2    |
|  |  |  |  |  | Sipa1l2    |
|  |  |  |  |  | Slc16a11   |
|  |  |  |  |  | Slc16a13   |
|  |  |  |  |  | Slc26a10   |
|  |  |  |  |  | Slc31a2    |
|  |  |  |  |  | Slc35g2    |
|  |  |  |  |  | Slc38a7    |
|  |  |  |  |  | Slc39a4    |
|  |  |  |  |  | Slc40a1    |
|  |  |  |  |  | Slc6a6     |
|  |  |  |  |  | Slc9a3r2   |
|  |  |  |  |  | Slit2      |
|  |  |  |  |  | Smad1      |
|  |  |  |  |  | Smad6      |
|  |  |  |  |  | Snn        |
|  |  |  |  |  | Sorbs1     |
|  |  |  |  |  | Sorbs3     |
|  |  |  |  |  | Sost       |
|  |  |  |  |  | Sox13      |
|  |  |  |  |  | Sox17      |
|  |  |  |  |  | Sox18      |
|  |  |  |  |  | Sox4       |
|  |  |  |  |  | Sox7       |
|  |  |  |  |  | Sparc      |
|  |  |  |  |  | Spata6     |
|  |  |  |  |  | Sprr2b     |
|  |  |  |  |  | Srgap1     |
|  |  |  |  |  | Srgap2     |
|  |  |  |  |  | St6galnac3 |
|  |  |  |  |  | Stab1      |
|  |  |  |  |  | Stap2      |
|  |  |  |  |  | Steap1     |
|  |  |  |  |  | Steap2     |
|  |  |  |  |  | Stmn2      |
|  |  |  |  |  | Syde1      |
|  |  |  |  |  | Syne2      |
|  |  |  |  |  | Synpo      |
|  |  |  |  |  | Tanc1      |
|  |  |  |  |  | Tax1bp3    |
|  |  |  |  |  | Tbx3       |
|  |  |  |  |  | Tcaf1      |
|  |  |  |  |  | Tcea2      |
|  |  |  |  |  | Tcf15      |
|  |  |  |  |  | Tcf4       |
|  |  |  |  |  | Tcf7l1     |
|  |  |  |  |  | Tead1      |
|  |  |  |  |  | Tead2      |

|  |  |  |  |  |          |
|--|--|--|--|--|----------|
|  |  |  |  |  | Tead4    |
|  |  |  |  |  | Tecpr1   |
|  |  |  |  |  | Tek      |
|  |  |  |  |  | Tfpi     |
|  |  |  |  |  | Tgibr2   |
|  |  |  |  |  | Tgif1    |
|  |  |  |  |  | Tgm2     |
|  |  |  |  |  | Thbd     |
|  |  |  |  |  | Thsd1    |
|  |  |  |  |  | Tie1     |
|  |  |  |  |  | Timp1    |
|  |  |  |  |  | Tinagl1  |
|  |  |  |  |  | Tjp1     |
|  |  |  |  |  | Tjp2     |
|  |  |  |  |  | Tmem176b |
|  |  |  |  |  | Tmem2    |
|  |  |  |  |  | Tmem204  |
|  |  |  |  |  | Tmem44   |
|  |  |  |  |  | Tmem88   |
|  |  |  |  |  | Tmsb10   |
|  |  |  |  |  | Tnc      |
|  |  |  |  |  | Tnfaip1  |
|  |  |  |  |  | Tnfaip2  |
|  |  |  |  |  | Tnfrsf22 |
|  |  |  |  |  | Tnfrsf23 |
|  |  |  |  |  | Tnfsfm13 |
|  |  |  |  |  | Tnks1bp1 |
|  |  |  |  |  | Tns2     |
|  |  |  |  |  | Tram2    |
|  |  |  |  |  | Trim16   |
|  |  |  |  |  | Trim3    |
|  |  |  |  |  | Trio     |
|  |  |  |  |  | Trp53i11 |
|  |  |  |  |  | Tsku     |
|  |  |  |  |  | Tspan18  |
|  |  |  |  |  | Tspan9   |
|  |  |  |  |  | Ttc28    |
|  |  |  |  |  | Ttc9     |
|  |  |  |  |  | Tulp4    |
|  |  |  |  |  | Unc5b    |
|  |  |  |  |  | Upp1     |
|  |  |  |  |  | Ushbp1   |
|  |  |  |  |  | Vash1    |
|  |  |  |  |  | Vegfa    |
|  |  |  |  |  | Vim      |
|  |  |  |  |  | Vsig10   |
|  |  |  |  |  | Vsig2    |
|  |  |  |  |  | Wscd1    |
|  |  |  |  |  | Wwtr1    |
|  |  |  |  |  | Yap1     |
|  |  |  |  |  | Ypel2    |
|  |  |  |  |  | Zcchc14  |
|  |  |  |  |  | Zdhhc1   |
|  |  |  |  |  | Zfp365   |
|  |  |  |  |  | Zfp366   |
|  |  |  |  |  | Zfp3611  |
|  |  |  |  |  | Zfp423   |
|  |  |  |  |  | Zfp503   |



|  |  |  |  |        |
|--|--|--|--|--------|
|  |  |  |  | Zfp532 |
|  |  |  |  | Zfp57  |
|  |  |  |  | Zfpm2  |

**Supplementary Table 6** ChIP target genes – ChIP peaks were assigned to the nearest transcription start site

| NoDox Runx    | PlusDox Runx  |           |               | PlusDox Evi1  |
|---------------|---------------|-----------|---------------|---------------|
| 1700019M22Rik | 1700019M22Rik | Klf3      | Smox          | Il31ra        |
| 4933402J10Rik | 4933402J10Rik | Cox19     | Ip6k1         | Kpna1         |
| Abcb11        | Pak3          | Slc1a4    | Emc10         | Pak3          |
| Gad2          | Limd1         | Mrpl46    | Erh           | Igf2bp3       |
| Pak3          | Abcb11        | Mul1      | Rhoa          | Limd1         |
| Fam107a       | Gad2          | Cep164    | Mcmbp         | Hic2          |
| Eea1          | Fam107a       | Tmem192   | Jpt2          | Gphn          |
| Limd1         | Eea1          | Mapk7     | Naglu         | Tspan3        |
| 4933412E24Rik | Hic2          | Creb3l2   | E230029C05Rik | Gm20268       |
| Igf2bp3       | Kpna1         | Foxe1     | Cdkn1a        | Dnah7b        |
| Kpna1         | Igf2bp3       | Moxd2     | Ldlrap1       | Plekha1       |
| Hic2          | Tspan3        | Mall      | Vdac1         | Dtnbp1        |
| Nxph1         | Il31ra        | Nsd1      | Adap1         | Batf3         |
| Jund          | Gphn          | Nedd1     | Xxylt1        | Myl12b        |
| Il31ra        | 4933412E24Rik | Atp6v0a2  | Bach2         | Fam107a       |
| Tspan3        | Dtnbp1        | Usp6nl    | Nup160        | Rsph3b        |
| Gramd3        | Gramd3        | Exosc5    | Btaf1         | Rock1         |
| Gphn          | Nxph1         | Nrbf2     | Kif11         | Ss18          |
| Mir8105       | 9530002B09Rik | Mir7661   | Srsf6         | 9530002B09Rik |
| Gm13283       | Nfe2          | Map2k7    | Acvr2a        | Gramd3        |
| Lmna          | Gm20268       | Bbc3      | Ndufa7        | Plxdc2        |
| Atg7          | Slc44a2       | Fig4      | Jun           | Zfp949        |
| Cdh12         | Gm12887       | Socs6     | Ndufab1       | Trpm6         |
| Atg7          | Timm8a1       | Pabpc4    | Lbr           | Gm12887       |
| Nfe2          | Inf2          | Ppib      | Foxo3         | 4930433N12Rik |
| Gm21119       | Sde2          | Atg14     | Rpl7a         | D130009I18Rik |
| Pknx1         | Pisd-ps1      | Uhrf2     | Mdm4          | Arhgap21      |
| Cenpu         | Gm2897        | Rabl6     | Mlec          | Aldh9a1       |
| Rara          | Pknx1         | Os9       | Stk10         | Malt1         |
| Rara          | Myl12b        | Abhd12    | Acadm         | Fam227b       |
| Snord116l2    | Aspcr1        | Ints11    | Dnaaf1        | Rps29         |
| Myl12b        | Socs3         | Mir28b    | Mir193a       | Timm8a1       |
| Sde2          | Jund          | Rab3il1   | Imp3          | Izumo1        |
| Timm8a1       | Lbr           | Hist1h2al | Acot11        | Ybx3          |
| Zfp949        | Cdh12         | Pcmt1     | Akap1         | Zfp945        |
| Mir23a        | Gm2093        | Pou2f1    | Dpp9          | Atf2          |
| Gm20268       | Platr30       | Haus8     | St5           | 1700019M22Rik |
| F5            | Cpt2          | Ndufb9    | Per2          | Abcb11        |
| Rpl22         | Chaf1b        | S1pr1     | Sh2b1         | Tex14         |
| Neat1         | Tuft1         | Rab3gap1  | Map3k3        | Zfp821        |
| Gm6194        | F5            | Dtnbp1    | Rbbp4         | Ifna13        |
| Pik3cb        | Cenpu         | Mbtps1    | Hist2h2bb     | Adam10        |
| Tyrp1         | 4933404K13Rik | Ciart     | 1110008F13Rik | Rpr1          |
| Itsn1         | Ccdc12        | Bahd1     | 2810013P06Rik | 4930455J16Rik |
| Polr2e        | Ccdc9         | Txndc2    | Gpsm3         | Alox5ap       |
| Tle4          | Gm21119       | Syt3      | Amdhd2        | Tex14         |
| Cd300a        | Gm6194        | Sympk     | Pola2         | 4933417O13Rik |
| Pisd-ps1      | Rnf44         | Gmcl1     | C030034L19Rik | Tmem131       |
| Baz2a         | Dynlt1b       | Hipk2     | Ilf3          | Cerk          |

|               |               |               |               |               |
|---------------|---------------|---------------|---------------|---------------|
| Pisd-ps2      | Tspan9        | Med7          | Bop1          | Tex14         |
| Fam53a        | Tspan9        | Sin3b         | M6pr          | 4930548G14Rik |
| Apbb1ip       | Tyrp1         | Cebpe         | Tpx2          | Gm16973       |
| Platr30       | Tyrp1         | Gjb5          | Zbtb12        | Tex14         |
| Mfap3l        | Ifna13        | F2rl3         | BC107364      | Sspn          |
| Def8          | Rpl22         | Fbxo21        | Rab5b         | 4933402J10Rik |
| Ap1m1         | 1110002J07Rik | Tmem206       | Usp43         | Tex14         |
| Pisd-ps2      | Rcc2          | Ankrd24       | Aldh2         | Tex14         |
| Dtnbp1        | Orai1         | Gmfb          | Gm2788        | Nemf          |
| Rgs2          | Mir23a        | Lgmn          | D730003l15Rik | Eapp          |
| G530011O06Rik | Gm14486       | Fam228b       | Ptk2          | Pknx1         |
| Snord116l1    | Cfap45        | Pou2f1        | Map2k3        | Eapp          |
| Tyrp1         | Snord116      | Zdhhc19       | Fbxo9         | Eea1          |
| Bcar1         | Emp3          | 1810026B05Rik | Nars2         | Tex14         |
| Etv6          | Atg7          | Trdmt1        | Leprot        | Eapp          |
| G530011O06Rik | Map2k4        | Ldb1          | Rpl4          | Btbd35f27     |
| P2rx1         | Fam212a       | Stk11ip       | Syngn2        | Cyp27a1       |
| G530011O06Rik | Tubb3         | Gna12         | Ppp4r1        | Ncoa1         |
| Pigl          | Mir8105       | Rnf146        | Dcaf12        | Gm26689       |
| Gm4981        | Dhrs4         | Map3k4        | Vamp8         | Fam213b       |
| Snord116l1    | 4930433N12Rik | Hspb7         | Cntrob        | Alox5ap       |
| Gm3558        | Pisd-ps2      | Pth2          | Ppp1r14b      | Zfp106        |
| Gm16998       | Fam53a        | Mpp6          | Phip          | Eapp          |
| Fosb          | Gm3696        | A330074K22Rik | Cpsf2         | Eapp          |
| 4930502E09Rik | Def8          | Whrn          | H2afz         | Eapp          |
| Trappc9       | Dennd4a       | Fam177a       | Mast3         | Eapp          |
| Gm9758        | Lmna          | Tcea1         | Bcl7b         | BC107364      |
| Tex14         | Znrf3         | Katnbl1       | C1ql1         | Cpxcr1        |
| Gm2093        | Gatad2a       | Cnot6         | Wdr53         | Nxph1         |
| Tex14         | Mrpl45        | 4930483J18Rik | 1810013L24Rik | Fut8          |
| Gm5795        | Fam46c        | Pbx1          | Fytd1         | Rpap3         |
| Eif4a1        | Itsn1         | Mpp5          | Kifc2         | Rasgrf1       |
| 4931406P16Rik | F2r           | Pbx1          | Actg1         | Eapp          |
| G530011O06Rik | Tex2          | Hif1a         | Acvrl1        | Rsph3a        |
| Snord116l1    | Snord116l1    | E130307A14Rik | Tor1aip2      | LOC666331     |
| 4930433N12Rik | Zfp945        | Cdc42ep4      | Cpsf2         | 4930404A05Rik |
| Ccl3          | Gse1          | Psma6         | Taldo1        | 4933412E24Rik |
| Pdzk1ip1      | Tex14         | Scarna2       | Ehmt2         | Kcnn2         |
| Ccdc85c       | Pisd-ps2      | Lgalsl        | Swap70        | Pdia5         |
| Tubb3         | Tex14         | Arpc5         | Ankrd28       | Gm26689       |
| Msh6          | Cnih3         | Cxxc5         | Xrcc6         | Eapp          |
| 4831440E17Rik | 6820431F20Rik | Fbxo31        | Atp6v0b       | Rbm39         |
| Tex14         | D130009l18Rik | Atxn2l        | Slc26a2       | Sepsecs       |
| Ccm2          | Nkd1          | Rnf141        | 3110021A11Rik | Gm29685       |
| Cuedc1        | Ccm2          | Ckap5         | Nasp          | Zfp746        |
| Plcl2         | Cyth1         | Plekhm1       | Kmt2d         | Naa20         |
| Lamtor5       | Ap1m1         | Cxxc5         | Stip1         | Siah1a        |
| Emp3          | Zdhhc20       | Snx1          | Tmem181b-ps   | Pdia6         |
| Gm14486       | Fosb          | Zfp3          | Rdm1          | Tspan8        |
| Mtss1         | Ctnnbip1      | Azi2          | 2010001A14Rik | Pisd-ps1      |
| Pde8a         | Rapgef6       | Scyl1         | Rab21         | Hfe2          |
| Gm2897        | Orc5          | Brd3os        | Ovca2         | Dohh          |
| Lmna          | Tex14         | Caap1         | Rbm15         | Smchd1        |
| Tox2          | Clic4         | Klhdc10       | Ctns          | Wdr5b         |
| Tex2          | Rara          | Rspry1        | Tmcc3         | Igsf3         |
| Gm3636        | 4931406P16Rik | Cebpg         | Gck           | Ago1          |
| Atg7          | Rara          | Rpl23         | Acap2         | Zfp608        |
| Inf2          | Tex14         | Gnai2         | Dock8         | Gm29678       |

|               |               |               |               |               |
|---------------|---------------|---------------|---------------|---------------|
| Zfp746        | Plcl2         | Men1          | Ubap1         | Zfp791        |
| Plxdc2        | Zfp949        | Cdkn2d        | Pitx2         | Tmem215       |
| Fosb          | Erdr1         | 1700030J22Rik | Pde5a         | Mir1258       |
| Runx1         | Get4          | Eif4e2        | Muc13         | Il1rapl1      |
| Gm10406       | Rabgef1       | Hnrnpa3       | Slc35b1       | Bzw2          |
| Atg7          | Gm5795        | Glg1          | Scgn          | Mir6955       |
| Ddx5          | Cnot1         | Gm536         | Il12a         | Npm2          |
| Tjp3          | Tpmt          | Luc7l         | Draxin        | 1700017G19Rik |
| Aspscr1       | Cdc34         | Pisd          | Fam174a       | Gm5797        |
| Rcc2          | Gm4981        | 2810433D01Rik | Bcr           | Ctsl          |
| Trdmt1        | Zfp868        | Tatdn2        | Pum1          | 4921534H16Rik |
| Tex14         | 4930502E09Rik | Fkbp2         | Secisbp2      | Ncbp3         |
| Sep-09        | Odc1          | Gspt1         | Telo2         | Fbxo47        |
| Ktn1          | Atg7          | Gata2         | Sec24b        | Atg7          |
| Tcf7          | Il17rd        | Crebrf        | Comm2         | Cntnap2       |
| Dyrk3         | Fam20b        | Fasn          | Emilin1       | Itsn1         |
| Usp13         | Trappc9       | Chst12        | Zfp628        | Tusc1         |
| Ybx3          | Hs6st1        | C130050O18Rik | Pde3b         | Ninj2         |
| Spn           | Morc3         | Sertad2       | Dcxr          | Fgfr2         |
| Mief2         | Usp12         | Ltn1          | Tigd3         | Cops8         |
| Fth1          | Bcar1         | Mdm2          | Srm           | Efnb2         |
| Lrpprc        | Bcl10         | Mta3          | Urb1          | Hexim1        |
| Rdm1          | Far1          | Smim15        | Ckap5         | Cntnap2       |
| Dhrs4         | Pmp22         | Top3b         | Tigd2         | BC107364      |
| Klf2          | Tgif2         | Mapkapk5      | Ggct          | Atp7a         |
| Zfp991        | Wipi2         | Slc30a4       | 1500009L16Rik | Gtf3c2        |
| 6820431F20Rik | Lrpprc        | Anapc10       | Irf2          | Jph1          |
| Clic4         | Slc6a9        | Ncoa4         | Agfg1         | Ccny          |
| Zfp395        | Glis2         | Usp2          | Mcp1          | Ywhaq         |
| Ywhaz         | Gpr33         | Cenpm         | Ngrn          | Neto1         |
| Zfp623        | Mfge8         | Zfp608        | Kdm6b         | Eif3h         |
| 1110002J07Rik | Atf2          | Ncoa5         | Ldha          | Kcnip1        |
| Tbc1d5        | Cxcl5         | Mir6957       | Shroom1       | Mir8105       |
| Ccdc12        | Dhrs9         | Arsg          | 4933416M07Rik | Fnbp1         |
| Gm21119       | Fam35a        | Rcor1         | Mdm1          | Zdhhc12       |
| Hrh1          | Lamtor5       | Plec          | Ankrd12       | Lrp5          |
| Gse1          | Gm16998       | Gata2         | Cass4         | Malat1        |
| Mir7223       | Mtrf1l        | Coa6          | Plk4          | Malt1         |
| Slc6a9        | Phf12         | Dhx9          | Sorbs1        | Atg7          |
| F2r           | Mmd           | Neur4         | Mctp1         | Asl           |
| Fam212a       | Mfap3l        | 5033406O09Rik | Klf6          | Gad2          |
| Mir193b       | Cdc42se2      | Gnai2         | Fbxo34        | Vstm4         |
| Emilin2       | Ccl3          | Slc30a4       | Nutf2         | BC107364      |
| Speer4f1      | Zfand6        | Gemin5        | Erf           | 4930467E23Rik |
| Tspan9        | Gm5069        | Atxn7l3       | Tmod3         | Sep-06        |
| Tspan9        | 4831440E17Rik | Pnpla8        | Bysl          | Col6a6        |
| LOC666331     | Ppcdc         | Fli1          | Dclre1c       | Gp9           |
| Gm5795        | Slc39a13      | Copz2         | Riok2         | Il1rapl1      |
| LOC666331     | Rdm1          | Mir6951       | Arl2bp        | Naaa          |
| Banp          | Gm9758        | Rras          | Fam98a        | Usp39         |
| Hist1h2bc     | Slc25a4       | Ninl          | Scn11a        | 2900052N01Rik |
| Maf1          | Tmbim7        | Fbxl3         | Sephs1        | IOC0044D17Rik |
| Grtp1         | Pdzk1ip1      | Gm5           | Pold4         | Snord67       |
| Tbl1x         | Btd35f27      | Arid1a        | Ahcy          | Tsr2          |
| Tmbim4        | 4921513I03Rik | Map7d1        | Pias1         | Arl4d         |
| Cdkn2aipnl    | Apbb1ip       | Thg1l         | Runx1         | AW554918      |
| Myh9          | Kdm5a         | Taf5l         | Hnrnp         | Platr30       |
| Rabgef1       | Mnt           | Arl3          | Tcf7          | Hist1h2bn     |

|               |               |               |               |               |
|---------------|---------------|---------------|---------------|---------------|
| Slc38a2       | Rgs2          | Map7d1        | Wdr89         | D230017M19Rik |
| Ubash3b       | Myo1d         | Abr           | Kat8          | Hist1h3i      |
| Gcdh          | Fnip1         | Appbp2os      | Gm13985       | Ccdc114       |
| Mrpl45        | G530011O06Rik | Tmem50b       | Susd3         | Gtf2h1        |
| Colgalt1      | Ubash3b       | Arrb2         | Gm16845       | Ncoa1         |
| Gm3696        | Ipo5          | Gas2l1        | Mapk1         | Slc35b3       |
| Snora16a      | Lmnb1         | Pold1         | Zfp512        | Mthfs         |
| Ccdc9         | Dennd4c       | Paxip1        | Polr2h        | Tmtc2         |
| Rnf44         | 1700028E10Rik | Gm21944       | Appl2         | Pak1ip1       |
| Diaph1        | Ssfa2         | Gm8013        | 4930558J18Rik | Cdh12         |
| Runx1         | Man1c1        | Smtnl2        | Morn1         | 1700072O05Rik |
| 9530002B09Rik | Itga2b        | Clybl         | Pex13         | Cd44          |
| Fcrls         | Gas7          | Tmem40        | 5430416N02Rik | Ly86          |
| Cxcl5         | Prdx3         | Rab3gap2      | Mgat4a        | Rfx5          |
| Zfp945        | Baz2a         | Pld2          | Papola        | Ptn           |
| Gm5458        | Usp3          | Vps35         | Mir6935       | Cacng2        |
| 1700060C20Rik | Dnpep         | Rhbdd2        | Kat6b         | Scn11a        |
| Fam20b        | Trip10        | Rnu11         | Nelfcd        | Ypel1         |
| Adgrg1        | Rasa1         | Cyp20a1       | Cep120        | 8430429K09Rik |
| 2610005L07Rik | P4hb          | Rnf24         | Tsc22d1       | Parp16        |
| Speer4cos     | Pgs1          | Wipi1         | Trim68        | Cltc          |
| Smarcd2       | Pim1          | Adora2b       | Pkdcc         | Rdm1          |
| Cxxc5         | Plxdc2        | Dynll2        | Parp11        | D230017M19Rik |
| Gm5796        | Sntb2         | Stom          | Il4ra         | Hist1h3h      |
| Lbr           | Txndc5        | B3gnt2        | Gm5122        | Hist1h2bc     |
| Dynlt1b       | Add1          | Epn1          | Primpol       | Cog1          |
| Cbx7          | Nyx           | Rnu11         | Dock4         | Robo1         |
| Etohd2        | Ccne1         | Mir5128       | Tpm2          | Tmed8         |
| Gm10354       | Ybx3          | Adcy9         | Riok2         | Gm1653        |
| Gm9758        | Polg          | Tjp3          | Ybx2          | Camsap2       |
| Cdh5          | Alox5         | Gpm6a         | Fam122a       | Hist1h2be     |
| Polg2         | Fth1          | Slc6a6        | Tnpo1         | Erh           |
| Mdga1         | G530011O06Rik | Rpl8          | Sav1          | A630001G21Rik |
| Ssc4d         | Avpi1         | Vasp          | Bbs10         | Snord116l2    |
| Adgrg1        | Agl           | Rabggtb       | Hps5          | Sertad2       |
| Pisd-ps2      | Zbtb22        | Pts           | Gon7          | Zdhhc19       |
| Gm13056       | 4930431P22Rik | Fam234a       | Fosb          | Btbd35f28     |
| Zbtb16        | Dgkd          | Ppp1r15a      | Mtx1          | Crxos         |
| Dennd4a       | Tbc1d5        | 6430548M08Rik | Il6st         | Gm6194        |
| Flywch1       | Vcan          | Cdkn2c        | Prorsd1       | Hist1h2af     |
| Rwdd1         | Bmpr1a        | Relt          | Akap13        | Ctdspl2       |
| Cmah          | Gm5458        | Grap2         | Slc35f5       | Gclm          |
| Sfxn5         | Smarcd2       | Rbm4          | Susd1         | G530011O06Rik |
| Lpin1         | Klhl21        | Setd1a        | Impa2         | 9530091C08Rik |
| Vcan          | Ccsap         | Nup50         | Mir378b       | Mirlet7i      |
| Arntl         | Brpf1         | Unkl          | Ptchd3        | Gm28626       |
| Tac4          | Aldh9a1       | Mrpl54        | Srd5a1        | Mir138-1      |
| Odf2l         | Xpr1          | Fos           | Preb          | Tyrp1         |
| Map7d1        | Rab11fip1     | Sel1l         | Zbtb44        | Grhpr         |
| Map7d1        | Ppm1g         | Gm16104       | Sft2d2        | Rps15a        |
| Atg7          | Lysmd3        | Tnpo1         | Gpr19         | Tmem114       |
| Hrh1          | Samd1         | Mindy2        | Myl12b        | Glt28d2       |
| Arid1a        | Ldhd          | Pacs1         | Lrrc32        | Mir1963       |
| Gse1          | P2rx1         | Tlnrd1        | Zfp219        | Cdh20         |
| Gm3696        | Mindy1        | Actr1b        | Aunip         | Cdk5rap2      |
| Cfap45        | Ugdh          | Pan2          | Med11         | Svip          |
| Pim1          | Mir7021       | Scaf8         | Tpx2          | Ddx20         |
| Cdh5          | Pdia6         | Hist1h4k      | Mir378b       | 2810004N23Rik |

|               |               |               |               |               |
|---------------|---------------|---------------|---------------|---------------|
| Hmgn1         | Dppa4         | Cox7a2l       | Mir762        | Gm3558        |
| Smarca5       | Zfp395        | Pik3c2a       | Lmln          | Gm4981        |
| Mindy1        | Ss18          | Tmub2         | Gpn2          | 5730455P16Rik |
| Lgalsl        | Plekha1       | Flt3l         | Smg5          | Rdm1          |
| Speer4d       | Shkbp1        | Sox12         | Trim8         | Pate1         |
| Eapp          | Tle4          | Gorasp2       | Bcl2l12       | Krt14         |
| Prdm14        | Rasgef1b      | Psemb2        | Cd47          | Lmo7          |
| D130009I18Rik | Sh2b3         | Vcl           | Lrrc28        | Hist1h2bl     |
| Rock1         | 1810022K09Rik | Csmp1         | 0610010K14Rik | Vav1          |
| Dnah7b        | Skp1a         | Slc11a2       | P4ha2         | Stxbp6        |
| Rplp1         | Defb48        | Ranbp3        | Prpf8         | Nyx           |
| Fam227b       | Tnrc6b        | Hoxb1         | Arrdc2        | Apbb1ip       |
| Sspn          | Azin2         | Ift20         | Csrp1         | Zfp36l2       |
| Coro1c        | Nemf          | Naglu         | Cpsf1         | Camk2g        |
| Adam10        | Cbfa2t2       | Setdb1        | Uba3          | Msl3l2        |
| Orc5          | Ep300         | Zc3h12a       | Adrm1         | Opalin        |
| Nt5c2         | Sh2b3         | Naa50         | Gpx4          | Gm31592       |
| Hist1h4k      | Itgb3         | Mtrf1l        | Rab3ip        | Mir218-2      |
| Far1          | Nemp1         | Cog2          | Gm13375       | Cacng8        |
| Ubald2        | Spryd7        | Mrp154        | 4930417O22Rik | 9330182L06Rik |
| Eapp          | Pcyt1a        | Atp2a3        | P3h4          | Gm14812       |
| BC107364      | Phb           | Zcchc11       | Dync1i2       | Lpar2         |
| Atp2b4        | Prkag1        | Tspan4        | Nrbp1         | Acox1         |
| Atf2          | Aldh3a2       | Ccdc9         | Ube2r2        | Slc38a8       |
| Ccdc102a      | Gm13986       | Capn5         | Zbtb48        | Pitpnm2       |
| Ghdc          | Dhrs3         | Prpf40a       | Acat2         | Prok2         |
| Dhx16         | Slc25a51      | Cib3          | 2310011J03Rik | Slc30a6       |
| Fam58b        | Rwdd1         | Slc35b1       | Aph1a         | Atg14         |
| Chaf1b        | Mief2         | Hist1h2bf     | Drc3          | Npy2r         |
| Gtf3c5        | Mtch1         | Pbrm1         | Egfl7         | Uvrag         |
| Gm21944       | Plcg2         | Phf13         | Brd2          | Trim33        |
| Zfp385a       | Wdr20         | Pcnt          | Uba3          | Ctsm          |
| Hmgxb3        | Eif4a1        | 1810010H24Rik | Cds2          | Armc2         |
| Hist1h3e      | Rhbdf2        | Coro6         | Ccdc115       | Slfn14        |
| Erd1          | 1700016G22Rik | Phf19         | Ctsl          | 4930463O16Rik |
| Hist1h3e      | Cdk17         | Anapc16       | Fam102b       | Nfyc          |
| Aldh3a2       | Bach1         | Pop5          | Diaph1        | Hist1h4j      |
| LOC105242399  | Wsb1          | Zbed4         | Bag3          | Zfp825        |
| Dolpp1        | Pkm           | Etnk2         | Wrnip1        | Fam220a       |
| Haus2         | Dusp3         | Gpatch8       | Fam20c        | Atp6v1d       |
| Urod          | Tex14         | Uap1          | Cep41         | Gtf3c6        |
| Zfp668        | Slc25a40      | Gpr146        | Ldb1          | Gm11423       |
| Lmod3         | Slc38a2       | Gng5          | Cdc42bpb      | Cpeb2         |
| Bcl9          | Fem1c         | Hhex          | Ccdc115       | Gm10409       |
| Gm9530        | Tex44         | Jmjd6         | Myo6          | Dscr3         |
| Gm9530        | Sec23a        | Ppie          | Creg1         | Hist1h2bj     |
| Gm21190       | Ppfia1        | Fam161b       | Chkb          | Tle1          |
| Skp1a         | Apaf1         | Tmem220       | Cnot11        | Plekhd1os     |
| C5ar2         | Foxl1         | Grc10         | Rtn4          | Bmp2          |
| Gse1          | Rdm1          | Tmem140       | Etv5          | Eef2kmt       |
| Rps29         | Limd2         | C77080        | Ift22         | Ssh2          |
| Calm1         | Etv6          | Atg2a         | Pebp1         | 4930519F16Rik |
| Ier2          | Fzd5          | Zbed4         | Taf6l         | Abca17        |
| 1700055C04Rik | Eapp          | Pank4         | Atxn1         | Wnt5b         |
| Fam213b       | Diaph1        | Hnrnpa2b1     | Letmd1        | Ube2u         |
| Ftl1          | Rnf115        | Tpd52l2       | Wasf1         | Slc16a9       |
| Mthfr         | Hlf           | Naglu         | Slc23a3       | Slco5a1       |
| Pde5a         | Lcp2          | Eif4a1        | Rps3a1        | Nfasc         |

|               |            |               |               |               |
|---------------|------------|---------------|---------------|---------------|
| Btbd35f27     | Msh6       | Extl3         | Bbc3          | Gm5627        |
| Dppa4         | Hivep1     | Kcnj16        | 1500004A13Rik | Chst11        |
| H2afv         | Clptm1     | 1810026B05Rik | Ska3          | Hapln1        |
| Ifna13        | Runx1      | Anln          | Tpm3          | Pigl          |
| Zswim6        | Mapk8      | Slc39a13      | Crip1         | Ccl26         |
| Hrh1          | Rnf157     | Pip5k1c       | Acbd5         | Gpihbp1       |
| 4930429F24Rik | Btbd35f28  | Hist1h2bg     | Elmsan1       | Hk1           |
| Cntnap2       | Cpne3      | Haspin        |               | Klhl1         |
| Gm16973       | Neurl3     | Slc45a1       |               | E030013I19Rik |
| Il17rd        | Kansl1l    | Papd5         |               | Zcchc14       |
| 2310033P09Rik | Dusp5      | Alox5         |               | Gm16573       |
| Zfpm1         | Zfp963     | 2900052L18Rik |               | Slmap         |
| Rhob          | Jph3       | Gm15772       |               | Bcan          |
| Gm30173       | Rgs18      | Kctd10        |               | Ktn1          |
| Jph3          | Hist2h2aa1 | Zfp750        |               | 4930440C22Rik |
| Commd7        | Heatr1     | Zfp985        |               | Usp8          |
| Mir7021       | Fcrls      | Chd6          |               | Mycs          |
| Gm13427       | Lzts3      | Klf11         |               | Crlf2         |
| 1700110I01Rik | Acsl1      | Smc3          |               | F2r           |
| Mir3075       | Klhl36     | Dck           |               | Kdm5a         |
| Mex3b         | Xylt2      | Tmem120b      |               | Sprr2a1       |
| H3f3a         | Arrdc3     | Papss1        |               | Srp68         |
| Pcyt1a        | Rps29      | Tpm3          |               | Hist1h4i      |
| Gm21119       | Rnd2       | Armc7         |               | Snord116      |
| Map2k3        | Wdr5       | Ctnnb1        |               | Gm10406       |
| Gm5458        | Daglb      | Mrpl40        |               | Rnu11         |
| Pcx           | Cib1       | Gm21948       |               | Rnu11         |
| Slbp          | Tle6       | Zfp652os      |               | Nts           |
| Trappc9       | Atox1      | Arf2          |               | Pirt          |
| Gm21119       | Nfe2l2     | Ppard         |               | Igtp          |
| Gclm          | Srebf2     | Nlk           |               | Rpl27         |
| Mgea5         | Kri1       | G530011O06Rik |               | Chrbn1        |
| Gm3383        | Rps12      | Fbxo5         |               | Dnajb8        |
| Zfp982        | Arhgap21   | Hyou1         |               | Slc4a3        |
| Cltc          | Sertad2    | Xrcc3         |               | Tmprss12      |
| G530011O06Rik | Arpc2      | Rplp0         |               | Dnmt3a        |
| Kansl1        | Grb2       | 9030025P20Rik |               | Rcn3          |
| Zbtb22        | Cdk2       | Gm3383        |               | Rufy1         |
| Eapp          | Dux        | Ap3d1         |               | Sbk1          |
| Lims1         | Ube2b      | Rchy1         |               | Epb41l4a      |
| Mtmr4         | Dhx16      | Tial1         |               | Fam96a        |
| Eapp          | Trappc9    | Actn4         |               | Neu1          |
| Osgin1        | Fzr1       | Adam17        |               | Nr2f1         |
| Ptma          | Alg11      | Tomm40l       |               | Srgn          |
| Hist2h2aa1    | Sfxn5      | Gm26689       |               | Bhlhb9        |
| Irs2          | Gm10941    | Hdac1         |               | Pisd-ps1      |
| Slc39a13      | Gcdh       | Tcf19         |               | F11r          |
| Ccdc12        | Pikfyve    | Banp          |               | Uqcc1         |
| Daglb         | Mtmr12     | Acy1          |               | Wnt2          |
| Epn2          | Wwp1       | Fam160a2      |               | 2310015A10Rik |
| Ccdc77        | Ascc2      | Mc2r          |               | Sfrp1         |
| Gpr39         | Tmed2      | Pard3         |               | Zdbf2         |
| 1810026B05Rik | Srsf2      | Trpv4         |               | Cnbp          |
| Nop2          | Igf1r      | BC030867      |               | Tmco4         |
| Gm12887       | Inf2       | Plekhh1       |               | Limk2         |
| Ostc          | Yif1b      | Ccnl1         |               | F830208F22Rik |
| Mdm1          | Ska2       | Nt5c3         |               | Mir1947       |
| Slc35a1       | Mir26b     | Ythdf1        |               | Plcl2         |

|               |               |               |  |               |
|---------------|---------------|---------------|--|---------------|
| Batf3         | Hmgn1         | Adamts10      |  | Chsy1         |
| Arhgap18      | Inf2          | Lactb2        |  | Adam30        |
| Klf11         | Ldlrap1       | Trpc1         |  | Ang           |
| Runx3         | Tubb5         | Rara          |  | Npy           |
| Iars          | Ulk1          | Dhx30         |  | Mettl4        |
| 2700046G09Rik | Stradb        | Asph          |  | Zfyve26       |
| Vgll4         | Pdim5         | Mir1231       |  | 4930579G18Rik |
| Vdac2         | Pgpep1        | Slc46a3       |  | Nr2f1         |
| Gm13986       | Styx          | Stxbp3        |  | Acvr2a        |
|               | Uba6          | Tgm2          |  | Procr         |
| Arhgap21      | Trim8         | Ap3m1         |  | Rabgef1       |
| Hist1h2al     | Nr1d1         | Frmd4b        |  | Sprr2a1       |
| Defb48        | Mir132        | Trib2         |  | Lmna          |
| Ndfip1        | Fam104a       | Cep72         |  | Hist1h2bq     |
| Gm31520       | Parp6         | Stk17b        |  | Snord116      |
| Olfm3         | G3bp2         | Fos           |  | Slc22a29      |
| Tmed2         | Tex14         | Hyls1         |  | 4930559C10Rik |
| Tmbim7        | Mnt           | Cep152        |  | Atp2a3        |
| Tnrc6b        | Epb41l2       | Abhd17c       |  | Pfas          |
| Hrh1          | Pknx1         | Spry2         |  | Tpp2          |
| Slc25a39      | Nxpe5         | Gm10532       |  | Mcts2         |
| 4930555G01Rik | Lyl1          | Snhg15        |  | A930015D03Rik |
| Phospho1      | Mir721        | Palb2         |  | Polr2a        |
| Cnm2          | Ccdc85c       | Zc2hc1a       |  | Cyb561        |
| Rgl2          | Atp6v0a1      | Tbc1d22a      |  | Hist1h2bg     |
| Erd1          | Phc2          | Gm26839       |  | Setdb1        |
| Atg7          | Pak2          | Casc3         |  | Hist1h2bf     |
| Nxpe5         | Sun1          | Amd1          |  | Mapt          |
| Gm21119       | Wdfy2         | Slc29a3       |  | Gm3383        |
| A630072M18Rik | Rnf149        | Ctnna1        |  | Mrgprb5       |
| Itga2b        | Arl4d         | Lpin1         |  | G530011O06Rik |
| Bbc3          | Trim37        | Uhmk1         |  | Gm21119       |
| Ppm1a         | Adnp          | Arhgap33      |  | 4930559C10Rik |
| 0610037L13Rik | Dgkeos        | Ly86          |  | Efcab3        |
| Atp2a3        | Pias4         | Cdk6          |  | Zfp335        |
| Tubb5         | Gm9530        | Cd81          |  | Pisd-ps2      |
| Tardbp        | Dok4          | D16Ert472e    |  | Snord116      |
| Fes           | Esrra         | Mre11a        |  | Dlc1          |
| Speer4cos     | Ktn1          | Pabpn1        |  | Ccdc9         |
| Pmp22         | Irs2          | Gm28042       |  | Clvs1         |
| BC107364      | Cdc42bpb      | 4933440J02Rik |  | Drd4          |
| Klf10         | Susd6         | Ctnna1        |  | Rplp1         |
| Klhl21        | Trim36        | Afap1         |  | Mlxipl        |
| Gm21190       | Tmem163       | Fbxo46        |  | Depdc7        |
| Osbpl2        | Ddx5          | Ddx39         |  | Sptan1        |
| Thoc1         | Fam227b       | Mfsd8         |  | Galk2         |
| Ube2f         | Gm9530        | Sod2          |  | Hist1h3e      |
| Dusp3         | Mfsd14a       | Def6          |  | Adnp          |
| Ripor1        | Mir30d        | Efnb2         |  | Cnih3         |
| Wdr5          | Qsox1         | Smg1          |  | Cdh18         |
| Canx          | Hic1          | Fhl3          |  | Gm28590       |
| Gmpr          | Afap111       | Rbm38         |  | Sptb          |
| Cubn          | Noxa1         | Gpr39         |  | Stk40         |
| Cyp27a1       | Ghdc          | Gm15319       |  | Lig1          |
| A630001O12Rik | 2610005L07Rik | Arhgap25      |  | Mtor          |
| Med17         | Prrc2b        | Cds1          |  | 4930520O04Rik |
| Sepsecs       | Cnm2          | Rmrp          |  | Alox5ap       |
| Slc7a15       | Clptm1l       | Faf2          |  | Mir6393       |

|               |               |               |  |               |
|---------------|---------------|---------------|--|---------------|
| Swap70        | Prkar1a       | Fbp1          |  | Sec61a1       |
| Slc8b1        | Eapp          | Ernm          |  | Stk40         |
| Tppp3         | Ptma          | Zfhx2         |  | Bmpr1a        |
| Susd6         | Efcab14       | BC048403      |  | Hist1h3e      |
| Aldh9a1       | Noxa1         | Ubox5         |  | Gm14635       |
| Otud6b        | Atr           | Tm9sf4        |  | Trim1         |
| Scyl1         | Iffo2         | Mut           |  | Baz2b         |
| E230025N22Rik | Pabpc1        | Gm12915       |  | Zdhhc14       |
| Mir148a       | Eapp          | Faiml         |  | Stim1         |
| 4933404K13Rik | Asb1          | Narfl         |  | Lrguk         |
| Tmem132b      | Gatad1        | 4930430F21Rik |  | Mir29b-1      |
| Tbl1xr1       | Cyb5r3        | Rpap3         |  | Etl4          |
| Grb2          | Rab3d         | Mir3075       |  | Exoc3         |
| Mylk3         | Eapp          | Qsox2         |  | Wipf3         |
| Mctp1         | Mlf2          | Gm6260        |  | Erbp4         |
| Uhrf1bp1l     | Adcy9         | Nap1l4        |  | Mir6979       |
| Rasgef1b      | Gm5796        | Npc2          |  | Kcnb1         |
| Gm21119       | Klh24         | Phf21b        |  | Prlr          |
| Abhd1         | Lmod3         | Tmna1ap       |  | Timd4         |
| Neurl3        | Vmn2r29       | F2r2          |  | Kazn          |
| Gale          | Cdv3          | Mboat2        |  | Rbfox2        |
| Umps          | Mbd2          | Incenp        |  | Fbxo11        |
| Glis2         | Rhbdd3        | Elmo1         |  | Klf3          |
| 6030408B16Rik | Nabp1         | Zcchc24       |  | Sgk3          |
| P4hb          | Prodh         | Slc46a3       |  | Lctl          |
| Srsf2         | Trrap         | Polr2j        |  | 2310043O21Rik |
| Tnrc6c        | Zfand5        | Ptpn2         |  | Brdt          |
| Mmd           | Slc45a4       | Rfx3          |  | Fabp12        |
| Mmd           | LOC666331     | Foxn3         |  | Tyrb1         |
| Odf1          | Lmbr1l        | Phf14         |  | G3bp2         |
| Cbfa2t3       | Garem1        | 9330159M07Rik |  | Cntnap5a      |
| Ccng2         | LOC666331     | Minos1        |  | Tox3          |
| Gm2897        | Saraf         | Pak1ip1       |  | Dtl           |
| 1700125G22Rik | Pisd-ps2      | Cdip1         |  | Cdk2ap1       |
| 2900060B14Rik | Myl12a        | 1810026B05Rik |  | Sgo1          |
| 4930431P22Rik | Fam168b       | Arap1         |  | Pgm2          |
| Fam104a       | Lims1         | Glcci1        |  | 4930467E23Rik |
| Vav1          | Prpf40b       | Mef2b         |  | Abcd4         |
| Sp7           | Prx           | Tgfbr1        |  | Esyt2         |
| Get4          | Gclm          | Atg5          |  | Fam58b        |
| Hyal2         | Ppm1a         | Optn          |  | Hist1h2bh     |
| Tal1          | Gm5458        | 1700017B05Rik |  | Speer4cos     |
| A630001O12Rik | Colgalt1      | 2900026A02Rik |  | 1700055C04Rik |
| Tbc1d7        | Znhit3        | Tpgs2         |  | Rpain         |
| Adcy9         | Cmtm6         | Gm13285       |  | Atf6          |
| Hrh1          | Tnrc6c        | Ywhaq         |  | Sirt6         |
| Scamp1        | Gpcpd1        | 0610038B21Rik |  | Smtnl2        |
| Gm15319       | Tmem2         | Vars          |  | Hist2h3c1     |
| Polg          | 1700021F05Rik | Cic           |  | Akap5         |
| Smarca5-ps    | Tbl1x         | Slc4a11       |  | Akap5         |
| Smarca5-ps    | Arcp5l        | Smchd1        |  | Mir193a       |
| Zfp982        | Supt20        | Mdn1          |  | Mir701        |
| Mks1          | Neto1         | Mir21a        |  | Hist2h3c1     |
| Tex14         | Coro1c        | Camsap2       |  | Herc1         |
| Arhgap23      | Tsga10        | Arhgap18      |  | Ulk2          |
| Vcl           | Pttg1ip       | Mir7009       |  | Ltc4s         |
| Mir28b        | Tmx4          | 1810043G02Rik |  | C3ar1         |
| Tnk2os        | Plbd1         | Abhd18        |  | Mettl3        |



|               |               |               |  |               |
|---------------|---------------|---------------|--|---------------|
| Dusp5         | Sreb1         | Dhcr7         |  | ltn2c         |
| lft57         | Usp13         | Smarca4       |  | Zfand4        |
| Mir29b-1      | Usp33         | Ftl1          |  | Foxk1         |
| Zfp106        | Arid3b        | Mia3          |  | Nsl1          |
| Pim3          | Stim2         | Serbp1        |  | Xpo4          |
| Tacc1         | Mfsd6         | Nomo1         |  | Scgb2b27      |
| Por           | Eepd1         | Insr          |  | Stim1         |
| G530011O06Rik | Bin2          | Ubxn1         |  | Lrrc69        |
| Plekha1       | Arntl         | Bnip3l        |  | Slc24a5       |
| Arhgap21      | Picalm        | Snca          |  | Map2k3        |
| Clic5         | Capzb         | Arhgap29      |  | 4930563F08Rik |
| Alg11         | Bcl9          | Gm17359       |  | ltpa          |
| Lamp1         | Runx3         | Zer1          |  | Rab11a        |
| lppk          | Gm3636        | Nsun4         |  | Chrm3         |
| Slc35b1       | Birc5         | Tpk1          |  | Gm15506       |
| Scn11a        | Gale          | Mcl1          |  | Tiparp        |
| 1700064J06Rik | Swap70        | Sdr42e1       |  | Med7          |
| Egln3         | Gbp1          | Pank3         |  | Nufip1        |
| Dnajc10       | Zbtb16        | Trim62        |  | Slc1a3        |
| Meis1         | Degs1         | Lemd2         |  | Hira          |
| Pacrgl        | Hmgn2         | Cdpf1         |  | 1700049E22Rik |
| Gm38404       | Atp23         | Gfod1         |  | Tmem40        |
| Lcp2          | Birc2         | 4930512M02Rik |  | Dlat          |
| Gjb5          | Inpp5f        | Odf1          |  | Fbxo38        |
| Micu1         | Gabpb1        | Actr10        |  | Smarca5       |
| Csgalnact1    | Dvl1          | Cherp         |  | Hgfac         |
| Brpf1         | Ddx59         | Itgav         |  | Zfp607a       |
| Eapp          | Rcan1         | Pfkip         |  | Ubt1          |
| Eapp          | Acacb         | Barhl2        |  | 1010001N08Rik |
| Typ23b        | Adgrg1        | Spcs3         |  | Wrb           |
| Eapp          | Ssh2          | Fhod1         |  | Asic3         |
| Tmem229b      | Spag9         | Bod1          |  | Irs2          |
| Casp2         | Prex1         | Itih5         |  | Edem1         |
| Kansl3        | A630072M18Rik | Atf2          |  | Trip6         |
| Rnf157        | Prex1         | Cmtm6         |  | Atad3aos      |
| Diablo        | Dcaf5         | Ptpn2         |  | Ppp1r11       |
| Scrib         | BC020402      | Zfp36l2       |  | Gm8630        |
| Jun           | Cks2          | Grl1          |  | Cxcr3         |
| Gnaz          | Pde8a         | Vars          |  | Acy1          |
| Alox5         | Gm16432       | Eef2kmt       |  | Lep           |
| Hdgp          | Chmp5         |               |  | Tsfm          |
| Cdc34         | Kihl3         | 2010106C02Rik |  | Adgrl4        |
| Ptpn1         | Cbx7          | Crispld2      |  | Gak           |
| Mir6388       | Rab11fip5     | Tbxas1        |  | Ing4          |
| Ddx19a        | Myo6          | Foxn2         |  | Nup160        |
| Sirt4         | Desi2         | Epb41         |  | Ptp4a2        |
| Kctd21        | Nr1d2         | Ier2          |  | Btbd35f12     |
| Snx1          | Mmab          | 2210414B05Rik |  | Bcl2l10       |
| Per3          | Bnip3         | Fam107b       |  | Ergic2        |
| Gata2         | Rdm1          | Slc4a11       |  | Mak           |
| Kctd10        | Ola1          | Eps8l3        |  | Cav2          |
| Gata2         | Ski           | Gucd1         |  | Gm6260        |
| Pisd-ps2      | Tmem59        | Rcsd1         |  | Rab21         |
| Cdc42se2      | Tmem60        | Gbe1          |  | Ak2           |
| Baiap2        | Calm1         | Ppp2r5d       |  | Ncoa3         |
| Hist2h3b      | Zfp623        | Rer1          |  | Sirt4         |
| Prr11         | Per1          | Gfod2         |  | Tmed9         |
| Arih2         | Lrig1         | AU022793      |  | Zfp623        |

|               |               |          |  |               |
|---------------|---------------|----------|--|---------------|
| Hist2h2aa1    | Cltc          | Dclre1c  |  | Gprc5c        |
| Dux           | Scrib         | Rcl1     |  | Hfe2          |
| Fam214b       | Zyx           | Plcl2    |  | Sertad2       |
| Tuft1         | Mir8102       | Mir6996  |  | Prkab1        |
| Usp22         | Per1          | C77080   |  | Cfap43        |
| Arnt          | Abca5         | Maml3    |  | Hspb9         |
| Fos           | Slc8b1        | Cdkn3    |  | Hist1h4n      |
| Defa21        | Tanc2         | Agbl1    |  | Rara          |
| Hinfp         | Wdr91         | Birc6    |  | Rara          |
| Zfp143        | Baiap2        | Tcf4     |  | Fasn          |
| Wdfy2         | A630001O12Rik | Hmgxb3   |  | Prkca         |
| Traf2         | Zbtb7b        | Ddx24    |  | 4930429F24Rik |
| Hist1h2ac     | Mir148a       | Aff4     |  | Dynlt1f       |
| Alox5ap       | Arhgap29      | Gm30570  |  | 6820431F20Rik |
| Nedd4         | Canx          | Ankrd1   |  | Htt           |
| Topbp1        | Pcx           | Gm31763  |  | G530011O06Rik |
| Prcc2b        | Rab22a        | Slc25a29 |  | Zfp981        |
| Ubc           | G530011O06Rik | Carns1   |  | Cntnap1       |
| Stub1         | G530011O06Rik | Ddx10    |  | Slc7a15       |
| Usp12         | Rnps1         | Zfp667   |  | Celf2         |
| Figl1         | Alox5ap       | Atp6v1d  |  | Rbsn          |
| Pitpnm2       | Unc13a        | Sp2      |  | Pak3          |
| Nfkbib        | Mybl1         | Gm21119  |  | Noc3l         |
| Apaf1         | Mysm1         | Cog6     |  | 1600002D24Rik |
| Gt(ROSA)26Sor | Psmc12        | Ecd3     |  | Xpa           |
| Usp3          | Wnt7b         | Cep85    |  | Ube2n         |
| Supt4a        | Abcf1         | Fbxo31   |  | Mrto4         |
| Rps6ka1       | Mtch2         | Clk3     |  | Gm5547        |
| Mical3        | Kctd11        | Med13    |  | Igf2bp3       |
| Gm21190       | Slc9a8        | Dido1    |  | Pfcp          |
| Manf          | D230017M19Rik | Stub1    |  | G3bp2         |
| Pisd-ps1      | Helb          | Ctsz     |  | Hps5          |
| Slc2a3        | Pdcd10        | Snn      |  | Oit3          |
| Prkaca        | Gmps          | Daam1    |  | Fam71d        |
| Arl4d         | Agbl1         | Trir     |  | Lincred1      |
| Cdc42bpb      | Sacs          | Psmc6    |  | Cybrd1        |
| Plscr3        | Mir148a       | Rps5     |  | Grik3         |
| Amotl2        | Igsf3         | Mfsd12   |  | Abhd3         |
| Mar-07        | Cgn           | Coro1c   |  | F2rl2         |
| Raet1c        | Ginm1         | Nadk2    |  | Amz1          |
| Slc45a4       | Csnk1a1       | Sec24c   |  | Gpr137b-ps    |
| Arap1         | Abhd1         | Micu1    |  | Trim67        |
| Dnaja1        | 1700100110Rik | Rcn1     |  | Polr2e        |
| Mcu           | Gm13056       | Tmem120a |  | Ipo11         |
| Hist2h3c2     | Mir3075       | Nr4a2    |  | Cps1          |
| Setd1a        | Kazn          | Rnf111   |  | Slc12a2       |
| D230017M19Rik | Pcbp3         | Ywhaq    |  | Ndufb7        |
| Tex14         | Camkmt        | Comtd1   |  | Atp1a1        |
| Prr14l        | Prrc1         | Myl12a   |  | Fam109b       |
| Tex44         | Txndc11       | Fbxl18   |  | Rin3          |
| Zfp637        | Gpatch2l      | C1ql1    |  | Pik3r4        |
| Adap1         | Cdc16         | Polr2d   |  | Psmc2         |
| Gm6260        | Zfp746        | Zfp692   |  | Zfp90         |
| Cebpe         | Fam107b       | Rbpj     |  | C920006O11Rik |
| BC107364      | Usp2          | Ptpre    |  | Gpr160        |
| Mir1941       | Ubp1          | Rpl36al  |  | Csf2ra        |
| Gm10406       | Ccdc112       | Gnas     |  | B230219D22Rik |
| Gsap          | Atl2          | Gm10033  |  | Deaf1         |

|               |               |               |  |               |
|---------------|---------------|---------------|--|---------------|
| Zmynd8        | Tfam          | Nedd4         |  | Zfp825        |
| Slc35d3       | Egln2         | Zhx3          |  | Gm21283       |
| Cdk19         | Spsb1         | Wiz           |  | Shb           |
| Ctnnb1        | Sspn          | St6galnac1    |  | Spag6         |
| Nyx           | Mir193b       | Mdh2          |  | Ing1          |
| Casc3         | Mtmr4         | 1810013L24Rik |  | Usp3          |
| Tprkb         | Raf1          | Id3           |  | Hsph1         |
| Zdhhc20       | Plekha8       | Zfp239        |  | Tfap2d        |
| Ybx3          | 1700025G04Rik | Pusl1         |  | Zfp804a       |
| Lmbr1l        | Phf10         | Clcn3         |  | Speer4f1      |
| Gpr33         | Mob1a         | Usp48         |  | Hnrnpd        |
| Optn          | Dpysl2        | Bnip2         |  | Nupr1l        |
| Gstz1         | Rab14         | Tcte3         |  | Sntg1         |
| D6Erttd527e   | Map2k3        | Dnajc7        |  | Scaper        |
| 1700016G22Rik | 1700029N11Rik | Prss42        |  | Itga2b        |
| Gulp1         | Actr2         | Dyrk2         |  | Ckb           |
| Wwox          | Skil          | Zbtb7a        |  | Arhgap23      |
| Ubp1          | Erlin2        | Rbpj          |  | Selenbp1      |
| Ep300         | Rps29         | Ubt2          |  | 1810010D01Rik |
| Hsp90ab1      | Inca1         | Szt2          |  | 1810010D01Rik |
| Tex14         | Gm13283       | Dync1h1       |  | LOC105242399  |
| Hist2h3c2     | Dmwd          | Cox5a         |  | Cep350        |
| Gm5535        | Klhl11        | Gm3383        |  | Igsf10        |
| Slc24a5       | Tpst2         | Coq10a        |  | 1700074H08Rik |
| Rdm1          | Gm21190       | Mir7094-2     |  | Nfkb2         |
| Etaa1         | Pak1          | A930024E05Rik |  | Tom1l2        |
| Tnik          | Ftl1          | Gas2l3        |  | Nup155        |
| Atr           | Hinfp         | Bcl3          |  | Sdf2          |
| Ifnar1        | Arid5a        | Lins1         |  | Rtn4          |
| 4921513I03Rik | Mtmr14        | Mtfmt         |  | Sdf2          |
| Cnnm4         | Ubr5          | Asap3         |  | Arpc5l        |
| Myadm         | Cubn          | Ube2h         |  | 4930502E09Rik |
| Hdgf          | Lrif1         | Arhgdia       |  | Dnajc7        |
| Bmpr1a        | Mar-03        | Gt(ROSA)26Sor |  | Raly          |
| Hgfac         | Tmem60        | Akap13        |  | Cryz1         |
| Gspt1         | Map3k12       | Abcb10        |  | Tspan9        |
| Zmiz1         | Smap2         | Tmtc2         |  | Tspan9        |
| Chmp5         | Arhgap23      | Atg7          |  | Fkbp10        |
| Ldhd          | Dmrt1i        | Ptprr         |  | Dnttip2       |
| Skil          | Rab43         | 1700027F06Rik |  | Jun           |
| Pgs1          | Mks1          | Mcm9          |  | Rara          |
| 6030466F02Rik | Ern1          | Srsf9         |  | Wnk4          |
| Mirlet7a-1    | Usp22         | Relt          |  | Dcaf12        |
| Abl2          | Rap2b         | Foxn2         |  | Arrb1         |
| Prkag1        | Metap1        | Copb2         |  | Mrpl20        |
| Gm26689       | Ube2d3        | Ywhah         |  | Cdc42se2      |
| Ypel5         | Mex3c         | Mcm9          |  | Hist1h4n      |
| G530011O06Rik | Meis1         | Dph3          |  | Ywhaz         |
| Rab3gap2      | Mex3c         | Dusp7         |  | Arhgef17      |
| Mnt           | Amz2          | Hmga1         |  | Irgm2         |
| Iba57         | Lrrfip1       | Edem1         |  | Hdgf          |
| Gabpb1        | Stk32c        | Rbm5          |  | Setd1b        |
| Fbxl14        | Xpc           | Parp2         |  | Snord118      |
| Vamp2         | 2610005L07Rik | Limk2         |  | Mex3b         |
| Morc3         | Mospd3        | Celsr3        |  | Def8          |
| Arm7          | Prkaca        | Slc3a2        |  | Pfn1          |
| Sub1          | Dgcr2         | Prkca         |  | Naglu         |
| Lysmd3        | Ppp3r1        | Nub1          |  | Ssh2          |

|               |               |               |  |               |
|---------------|---------------|---------------|--|---------------|
| Cenpn         | Ankrd50       | Pigv          |  | Slc25a19      |
| Exd1          | Cyb5a         | Hipk1         |  | 5033406O09Rik |
| Wwc2          | Cbx8          | Lin54         |  | Tubb3         |
| Gm11437       | Pdk1          | Tm2d2         |  | Klhdc2        |
| Nr2c2         | Fmnl3         | Hnrnpd        |  | Tal1          |
| Jun           | Cmip          | Spg7          |  | Slc47a1       |
| Ell           | Foxj1         | Zfp281        |  | Sep-09        |
| Med24         | Gtf2e2        | Map1lc3a      |  | Hist1h4k      |
| Hist1h2bf     | Slfn14        | Ucp2          |  | Nme1          |
| Atf7ip        | Nkain1        | Ankrd40       |  | Ints9         |
| Ncoa4         | Pole4         | Polh          |  | Ndubf9        |
| Cited2        | Prkab1        | Chtf8         |  | Tbc1d7        |
| Wipi2         | Mkl1          | Odf2          |  | Spdef         |
| Nemf          | A330069E16Rik | Ptpn1         |  | Tyrp1         |
| Hrh1          | Cellf6        | Ensa          |  | 6030458C11Rik |
| Slc44a2       | Bbip1         | Rpl3          |  | Ccnd3         |
| Ppp2ca        | Abhd2         | Ube2g1        |  | Hist1h2al     |
| Rere          | Rraga         | Gosr1         |  | Pgam1         |
| Sh3gl1        | Etv6          | Atf7ip        |  | Inf2          |
| Hist1h2ah     | Nt5dc3        | Slc45a1       |  | Gm3143        |
| Cd3eap        | Bard1         | Cdr2l         |  | Mctp2         |
| Cd3eap        | Gm2a          | Slc25a33      |  | Rnf24         |
| Zfp981        | Fggy          | Rita1         |  | Tjp2          |
| Zbtb7b        | Gm3558        | Tap1          |  | Inf2          |
| Commd7        | Ccdc124       | Zc3h7a        |  | Vps37b        |
| Prkar1a       | Abhd11        | Eif4g1        |  | 2310010J17Rik |
| 1700045H11Rik | Purb          | Rab1b         |  | Tmem250-ps    |
| St3gal2       | Hist2h3c2     | Hrh1          |  | Tulp4         |
| Hnrnpd        | Erdr1         | Atp5b         |  | Taf5l         |
| A330069E16Rik | 4930413G21Rik | Slc35e4       |  | Homer3        |
| Gemin5        | Iscu          | Lrp8          |  | Kti12         |
| Yars          | Pcca          | Atg4c         |  | Scoc          |
| Spn           | Llgl2         | Lipc          |  | Inf2          |
| 4930526I15Rik | Fosb          | Txnip         |  | 0610009O20Rik |
| Arcp2         | 2610042L04Rik | Hist1h3f      |  | 1700086O06Rik |
| Cbfa2t3       | Fbxl14        | Fbxo48        |  | Gm45915       |
| 4930555G01Rik | Calm3         | Dnajc30       |  | Shroom3       |
| Myliip        | Crocc         | Tm9sf3        |  | Specc1        |
| Ube4b         | Senp8         | Herc1         |  | Mir7021       |
| G530011O06Rik | Faap100       | Cnbp          |  | Ubxn4         |
| Wwox          | Neat1         | Sap18         |  | Mir99ahg      |
| 4933401D09Rik | Kctd21        | Abca7         |  | Med13l        |
| Smu1          | Sh3glb2       | Vps36         |  | Xrcc4         |
| Pkm           | Cuedc1        | Frs2          |  | Rin1          |
| Ikzf2         | H2afv         | Abtb1         |  | Slit1         |
| Zyx           | Utp18         | B330016D10Rik |  | Tufm          |
| Zfp395        | Gtf2a2        | Zdhhc12       |  | Arhgap18      |
| Tmem57        | Wwc2          | Usp38         |  | Tspan32       |
| Mir1258       | Inpp5a        | Zfyve16       |  | Aftph         |
| Plcl2         | Psen2         | Rnf126        |  | Ppp1r13b      |
| Lhfp12        | Fech          | Ptprs         |  | Etl4          |
| Rasa1         | Sptbn1        | Sptan1        |  | Lrp10         |
| Nudt2         | Pnrc1         | Snx30         |  | Mir6374       |
| Gm16432       | Klf10         | Kdelr2        |  | 2010010A06Rik |
| 2900009J06Rik | Pkd1          | A930018P22Rik |  | ltn2c         |
| App1          | Ywhaz         | lppk          |  | Crk           |
| Socs3         | Sqstm1        | Lrrc29        |  | Ptprf         |
| Ttc39b        | Lclat1        | Stt3b         |  | Cars          |

|               |               |               |  |               |
|---------------|---------------|---------------|--|---------------|
| 1700110I01Rik | Dmtf1         | Map2k2        |  | Rtca          |
| 5033406O09Rik | Acer2         | Vps37c        |  | Serpinf1      |
| Tcf3          | Lig4          | Fau           |  | Dock8         |
| Ccnd3         | Speer4f1      | Plcg1         |  | Gimap6        |
| Tjp1          | Zfp821        | Cpsf6         |  | Txnrd1        |
| Oit3          | Snord116      | Kmt5a         |  | Meis1         |
| C030034I22Rik | Parp16        | Aacs          |  | Zfp787        |
| Fer           | 4930511A08Rik | Shmt1         |  | Gxylt1        |
| Atp23         | Klf4          | Abhd17a       |  | Cct4          |
| Gins2         | Szrd1         | Rps16         |  | Ifngr2        |
| Prmt5         | Lamtor1       | Gm7457        |  | Zfp473        |
| Eapp          | Ccdc102a      | Gm5535        |  | Spn           |
| Nfe2l2        | Kiz           | Zswim3        |  | Dhrs9         |
| Hook1         | Hira          | Pml           |  | Rcn1          |
| Slc30a4       | Scaf4         | Abhd17a       |  | Desi2         |
| Pias4         | Fgfr3         | Mcee          |  | 1810010D01Rik |
| 4933440J02Rik | Tbc1d23       | Cdc42         |  | Dnajc10       |
| Zfp868        | Plekhhf2      | Kbtbd3        |  | Nubp1         |
| Gm10941       | Bcap31        | Slc20a1       |  | D630024D03Rik |
| Ddb1          | Fer           | Rpl37         |  | Mir7013       |
| Kctd11        | Tox2          | Atp13a2       |  | Luc7l         |
| Pex5          | Pfkp          | Dnajc10       |  | 1110002L01Rik |
| Mcu           | Fam43a        | Slc39a13      |  | Smad7         |
| Ints10        | Ryr2          | Ptch1         |  | Ceacam16      |
| Tctex1d2      | Mms19         | G3bp2         |  | Cubn          |
| Psmc1         | Dmac1         | Tmf1          |  | Gm9895        |
| Zfand5        | Pgbd5         | Aip1          |  | Oca2          |
| Tnpo1         | Mturn         | Mir1191b      |  | Bcar1         |
| Cdkal1        | Stk3          | Slc25a38      |  | Nsun4         |
| Alkbh7        | Grsf1         | Qrich1        |  | Mars          |
| Stau1         | Sepsecs       | Pnkp          |  | Pim1          |
| Celf2         | Eif4ebp2      | Strada        |  | Rpl13a        |
| Kctd3         | Dnah7b        | Ahcyl1        |  | Phf10         |
| Heatr1        | Gulp1         | Sox18         |  | Gm5796        |
| Psmc1         | Ascc3         | Guk1          |  | Kif2c         |
| 1700096K18Rik | Rnaset2a      | Gaa           |  | Gm10406       |
| Slc39a13      | Trim24        | Nudt2         |  | Arl6ip1       |
| 2210414B05Rik | Rnf103        | Arid3a        |  | S100a10       |
| Bcl3          | Med26         | Tom1l2        |  | Vdac1         |
| Ctps          | Cstf2         | Mir142        |  | Gm3696        |
| 9130011E15Rik | Prdm14        | Jup           |  | Vdac1         |
| Id1           | Afg3l2        | Kdsr          |  | Pim1          |
| Pabpc1        | Clec9a        | Opn3          |  | Dcaf5         |
| 4930505N22Rik | Zfp791        | Phykpl        |  | Mob3c         |
| Kri1          | Tspan17       | Ubiad1        |  | Ctc1          |
| Vangl1        | Mien1         | Ppp6r1        |  | Mir23a        |
| Mettl1        | Twsg1         | Gm21119       |  | Dynlt1b       |
| Med7          | 6030408B16Rik | Pde4dip       |  | Mir7034       |
| Gm10033       | Armc6         | Myl12b        |  | Hhat          |
| Smg6          | Nfkbiz        | Canx          |  | Fxr2          |
| Ctdsp1        | Pik3cb        | Bsn           |  | Rack1         |
| Josd1         | Fam210b       | Myl12b        |  | Mir6388       |
| Susd1         | Mir193a       | S1pr1         |  | Rack1         |
| Nme1          | Rasa1         | Mier3         |  | Hist1h3f      |
| Klf10         | Cecr2         | Dusp10        |  | Fbxl19        |
| Csnk1g2       | Mnt           | Nfkbib        |  | Arhgdib       |
| Gatad2a       | Skap2         | 1700030F04Rik |  | Mettl23       |
| Myo6          | Gm10941       | Hist1h2ap     |  | Psmc3         |

|               |               |               |  |               |
|---------------|---------------|---------------|--|---------------|
| Utp18         | Klf10         | Akirin1       |  | 2010001A14Rik |
| Gm3500        | Hpcal1        | Seh1l         |  | Fbxl19        |
| Med13l        | Fam109a       | Lsm7          |  | Pgs1          |
| Adipor2       | Gins2         | Plekha4       |  | Myo1c         |
| Gfi1          | Nt5dc3        | Ern1          |  | Vmn2r-ps11    |
| Cinp          | 1700123M08Rik | Hmgcr         |  | Limd2         |
| Ppp1r18       | Ubald2        | Ccar1         |  | Myo1c         |
| Cd276         | Tmem123       | Mpp2          |  | Aurkb         |
| Pcna          | Mki67         | Mknk2         |  | Gt(ROSA)26Sor |
| Ndel1         | Pex5          | Wnk4          |  | Gse1          |
| Sptbn1        | 4930559C10Rik | Sp4           |  | Cant1         |
| Cnot1         | Ogdh          | A430078I02Rik |  | Smad7         |
| Mcl1          | Gga1          | 1700037H04Rik |  | Gp1ba         |
| Zfp541        | Map7          | Dbil5         |  | Hist2h3b      |
| Cuedc1        | Klf13         | Kctd7         |  | Plxdc1        |
| Pikfyve       | Polr2e        | Klf9          |  | Cuedc1        |
| Wee1          | Ogdh          | Psme3         |  | Def8          |
| Itgb3         | BC005537      | Rundc1        |  | Gm5797        |
| Rere          | Map2k4        | Sep-09        |  | Mir21a        |
| Mob3a         | Olfm3         | Timm13        |  | Rhbf2         |
| Ap1m1         | Anapc4        | Rapgef1       |  | Zfp960        |
| Ipo5          | Nt5dc3        | Ilvbl         |  | G3bp1         |
| Akap5         | Adipor2       | Ndr1          |  | Tbxas1        |
| Rap1gap2      | Il6           | Nt5c2         |  | Adgr1         |
| Ppp2ca        | Eapp          | Map3k2        |  | Bitbd19       |
| Usp3          | Gpc2          | Dhx30         |  | Olfr225       |
| Atxn2l        | Odf2l         | Fam58b        |  | Kansl1        |
| Serf2         | Por           | Sidt2         |  | Gpatch1       |
| Pafah1b2      | C630043F03Rik | Atp2a2        |  | Ubxn1         |
| Srxn1         | Polr2a        | Gprc5c        |  | Onecut3       |
| Ppp1r15a      | Rab5a         | Fxr2          |  | Mir5129       |
| Tbkbp1        | Manf          | Usp3          |  | 4933404K13Rik |
| Qrich1        | Polg2         | Atic          |  | Zzz3          |
| Akap5         | Zdhhc3        | Tprgl         |  | Alox5ap       |
| 4933411E08Rik | Ctdsp2        | Brap          |  | Olfr1389      |
| Gas7          | Srr           | Lyl1          |  | Kctd10        |
| Arid3a        | Tmbim4        | Fars2         |  | Erh           |
| Cct4          | Cbfa2t3       | Josd1         |  | Cbr4          |
| Gnai2         | 1700125G22Rik | Dennd6a       |  | Rpl711        |
| Taf15         | Junb          | Arl4c         |  | Mir7676-1     |
| Trim8         | Phf23         | Hist3h2bb-ps  |  | Vipas39       |
| Foxn3         | Ost4          | E2f8          |  | Lztf11        |
| Ptpn12        | Sertad3       | Pafah1b2      |  | Ap5m1         |
| P2ry1         | Fbrsl1        | Uvr9          |  | Arhgap8       |
| Ola1          | Ccdc12        | 2900060B14Rik |  | Sema6b        |
| Ube2d3        | Tardbp        | Arl1          |  | Tmbim4        |
| 4932435O22Rik | Nxf1          | Creld1        |  | Acox3         |
| Arid1a        | Maf1          | Mettl23       |  | Ubr1          |
| Dcaf11        | Dhdds         | Tln1          |  | Bin2          |
| Mnt           | Mir6957       | Fars2         |  | Runx1         |
| Atg7          | Poln          | Hras          |  | Leng1         |
| Gm21944       | Dyrk1a        | Junb          |  | Slc46a2       |
| Ppp1r9b       | Fam213b       | Grk6          |  | Zfp873        |
| Tatdn2        | Epn2          | Arhgap1       |  | Glt28d2       |
| Arf1          | Vav1          | Arfgap3       |  | Ipo7          |
| Fzd5          | Calu          | Tmpo          |  | Olfr1151      |
| Ppp2r5b       | Snhg4         | Hspa4l        |  | Atad1         |
| B3gnt7        | Smad6         | Syde2         |  | Cops7a        |

|               |               |               |  |               |
|---------------|---------------|---------------|--|---------------|
| Slc45a1       | Rassf3        | Fzd7          |  | Cstf3         |
| Hist1h2bn     | Eapp          | Drg2          |  | 1700016L04Rik |
| Tcf3          | Cfap97        | Srgap2        |  | Nek6          |
| Gm15471       | Rps6ka5       | Trp53         |  | Egln3         |
| Tln1          | Lrpap1        | Mtag2         |  | B4galt1       |
| Gm20605       | D330050G23Rik | Rnf139        |  | Stard8        |
| Cmip          | Tnfaip2       | Spns2         |  | Zfp825        |
| Rnd2          | Arid1a        | Fzd7          |  | Dand5         |
| H3f3b         | Iba57         | Snx14         |  | Parp4         |
| Zfp750        | Cry1          | Rgs10         |  | Amz2          |
| Pign          | BC107364      | Fam120aos     |  | Slc25a46      |
| Efnb2         | Slc22a5       | Itpkc         |  | Gstp2         |
| Kbtbd2        | Gpr155        | Mir6951       |  | Zfp637        |
| Ttc41         | Atp6v1b2      | Hspa2         |  | Myo5c         |
| Itgb1bp1      | Ankrd13d      | Ksr1          |  | 8030442B05Rik |
| Fam109a       | Ahsa2         | Phf20         |  | Tulp1         |
| Map4          | Cbfa2t3       | Mpdu1         |  | Utp11         |
| Irs2          | Arf5          | Gm13034       |  | Dyrk2         |
| D730003115Rik | Hdgf          | Grcc10        |  | Gm30570       |
| Rgs3          | Sgtb          | Uchl5         |  | Mettl6        |
| Rpl31         | Cd300lf       | Micall2       |  | Tmod3         |
| 1700029H14Rik | Stat3         | Rnf139        |  | Gfi1          |
| Slc15a4       | Haus2         | Mir6546       |  | Kbtbd7        |
| Plbd2         | BC049762      | Ier5          |  | Ccdc12        |
| Zmym3         | Slc30a1       | Snx15         |  | Aurkaip1      |
| Gm33619       | Mex3b         | Rai1          |  | 3830408C21Rik |
| Psm13         | Pcsk7         | Nrf1          |  | Ptpn12        |
| Gm19589       | Ralb          | Thrap3        |  | Prps113       |
| Azin2         | Hist2h3c2     | Azin1         |  | Gpatch8       |
| Axdnd1        | Slc16a13      | Actb          |  | Pcyt1a        |
| Mir7237       | Ehmt1         | 6820431F20Rik |  | D230017M19Rik |
| Spns2         | 4933412E12Rik | Kazald1       |  | Trim8         |
| Diaph3        | Dscr3         | Tmem123       |  | Prrc2b        |
| Map4          | Pik3cb        | Rbbp4         |  | Kcmf1         |
| Zfp326        | Klf2          | Zmiz1         |  | Fam173a       |
| Nts           | Mir29b-1      | Epn2          |  | Nop53         |
| Ccdc54        | Copg2         | Rhot1         |  | Birc6         |
| Smad4         | Utp14b        | Nbeal2        |  | Mtdh          |
| Nrip1         | Atg10         | Sla           |  | Cbr4          |
| Rnf169        | Dnaic1        | Fam103a1      |  | Tnfaip2       |
| Nsun2         | Bsg           | Fam83g        |  | Tbxas1        |
| Mir6957       | Frat2         | Lrrc59        |  | 1700030F04Rik |
| Klrb1c        | Polr3h        | Ddx52         |  | Arih1         |
| Sgcd          | Sod1          | Cdk9          |  | Rab8b         |
| Syne3         | Ap3s1         | Park7         |  | Shank3        |
| Aasdh         | 2810410L24Rik | Dot1l         |  | Cdkn1b        |
| Dnmbp         | Tubb4b        | Slc23a2       |  | Lrrc24        |
| Ppp2r5d       | Trpm6         | Nolc1         |  | Zfp84         |
| Bmf           | Ropn1l        | Emc7          |  | Txndc11       |
| Egr3          | Rprl1         | Dnajc16       |  | Crlf3         |
| Uvssa         | Pxk           | Cnn3          |  | Dhrs7         |
| Phc2          | Nup54         | 2700046G09Rik |  | Lsm4          |
| Afap111       | Cyp2b23       | Cox18         |  | Lym9          |
| Smg9          | Gm21119       | Gimap6        |  | Mir681        |
| Syt7          | Zfp991        | Pias3         |  | 2410006H16Rik |
| Gng2          | Ppp1r21       | Pias3         |  | Mgat1         |
| Mir21a        | Usp20         | Morn3         |  | Dynl1b        |
| Dyrk2         | Rbm38         | Atf6          |  | Nup155        |

|               |               |               |  |               |
|---------------|---------------|---------------|--|---------------|
| Gm33677       | Sbf1          | Camk2g        |  | Speer4cos     |
| Spag9         | Tbc1d31       | Foxo3         |  | Sp7           |
| Rcbtb2        | Copg1         | Nek2          |  | Pak6          |
| Cmtm6         | Fam49b        | Rpl27a        |  | Scaf8         |
| Ppm1g         | Rock1         | Vapa          |  | Pisd-ps2      |
| Tmem163       | Speer4cos     | Kif2c         |  | Sap30l        |
| Bin3          | Ccne1         | A730008H23Rik |  | Crk           |
| Clec11a       | Supt4a        | Ngly1         |  | Sirt7         |
| Eif4ebp1      | Phospho1      | Ncbp3         |  | G530011O06Rik |
| Ddx54         | Rhob          | Nespas        |  | Mrpl45        |
| Sertad2       | Golph3        | 4930578M01Rik |  | G530011O06Rik |
| Mir7049       | Lap3          | Hexdc         |  | Nrbp1         |
| Arpc5l        | Mpp7          | Pmf1          |  | Nktr          |
| Arpc1b        | Ube2n         | Magi3         |  | Tbcd          |
| Pdcd5         | Otud6b        | Plekhg2       |  | Gm13427       |
| 9030204H09Rik | Sgms1         | Spryd3        |  | Gm21944       |
| Cbx8          | Sugct         | Mir6935       |  | Dhx8          |
| Stab2         | Foxk1         | Rsrp1         |  | Rab11fip3     |
| Taf6l         | Mios          | E2f3          |  | Micall2       |
| Tle1          | Incenp        | Txn14a        |  | Gm13285       |
| Lrrn2         | Rbm38         | Tab2          |  | Utrn          |
| Ube2q2        | A230028O05Rik | Rpl12         |  | Smim3         |
| Cep68         | Ndfip1        | Fam83g        |  | Fasn          |
| Kcnd3         | D5Ert615e     | Atxn7i3       |  | Gm4285        |
| C2cd2         | Slc46a2       | Bzw2          |  | Ankrd40       |
| Tmem167b      | Usp32         | Atf3          |  | P2rx1         |
| Keap1         | Oxct2a        | Opa3          |  | Ccdc43        |
| Slc25a4       | Nfxl1         | Specc1        |  | Grb2          |
| Zfp963        | Als2          | Scamp1        |  | Slc30a7       |
| Gm35986       | Arl6ip1       | Fam229a       |  | Spr2a3        |
| Mdm2          | Mettl1        | Zfp260        |  | Snord65       |
| Tmx4          | Fbrsl1        | Spag5         |  | Ttc25         |
| Fos           | Gm5795        | Diaph3        |  | 2900052L18Rik |
| Lrig2         | Bicd1         | 1110036E04Rik |  | Zfp984        |
| Gtf2e2        | Snx10         | Haus2         |  | Col19a1       |
| B4galt1       | Gmeb1         | Olf1151       |  | Nfe2          |
| Acot8         | Fam220a       | Mrpl41        |  | Arid1b        |
| Raf1          | Trim3         | Gtf3c5        |  | Lbr           |
| Cdkn2aipnl    | Smpd1         | Cdc25c        |  | Pex3          |
| Prkab1        | Arl5b         | Pa2g4         |  | Frmd4b        |
| Gm9958        | Pik3r1        | Nrbp1         |  | Dennd4b       |
| Nemp1         | Baz1b         | Capns1        |  | M6pr          |
| Stx2          | Uqcrcf1       | Poc5          |  | Erp27         |
| Vdac1         | Lsm14b        | Eef1a1        |  | Nudt21        |
| Mir142        | Tmem183a      | Arrdc1        |  | Wdr47         |
| Cirbp         | Btg2          | Vmn1r87       |  | Med17         |
| Exoc6b        | Mcl1          | Gm38404       |  | Slc2a3        |
| Ensa          | Rock1         | Txnrd3        |  | Usp32         |
| Hist2h2aa2    | Elmod2        | 0610010K14Rik |  | Ntmt1         |
| Pknx1         | Slbp          | Hpn           |  | Gm5535        |
| Zfp609        | Slc25a23      | Trappc11      |  | Wdr5          |
| Foxk1         | Ctbp1         | Nmur2         |  | Rps21         |
| Hist1h2bq     | Tmem158       | Pfas          |  | 6720489N17Rik |
| Rbpj          | Tcf3          | Cdc23         |  | Nat10         |
| Zfp706        | Tcf12         | Taldo1        |  | Hist1h2al     |
| Pkm           | 1600002D24Rik | Egr3          |  | Agm           |
| Slc25a23      | Zfp385a       | Gtf2h5        |  | Trappc8       |
| Axin2         | 4921536K21Rik | Atg16l2       |  | Dapp1         |



|               |               |               |  |               |
|---------------|---------------|---------------|--|---------------|
| St6galnac1    | Thoc1         | Tarsl2        |  | Mtss1         |
| Ankrd13d      | Yars          | Slc37a4       |  | Mrpl39        |
| Utp14b        | Sdccag3       | Gm10646       |  | Erdr1         |
| Nup160        | Fos           | Gins4         |  | Cdc42se1      |
| Zkscan6       | Arf4          | 4930441H08Rik |  | Gorasp2       |
| Vdac1         | Atp23         | Rfisd         |  | Srm           |
| Canx          | Limk1         | Pdhub         |  | Itsn1         |
| Ptpn1         | H3f3b         | Cops8         |  | Polr3e        |
| Hist1h1c      | Lrrc74b       | Ncor1         |  | Asb1          |
| Cnih3         | Rps6ka1       | Ccdc94        |  | 4921513I03Rik |
| Atg7          | Pitpnb        | D230030E09Rik |  | Psmc1         |
| Nfat5         | Arrdc4        | Ankrd37       |  | Ifitm5        |
| Myo1d         | Casp2         | Hgsnat        |  | Nron          |
| Mex3c         | Aasdh         | Gm38431       |  | Rab21         |
| Nucb1         | Fancc         | Narf          |  | Il6st         |
| Dennd2c       | Ptbp1         | Lars2         |  | Ccdc191       |
| Baz1b         | Mesd          | Ufl1          |  | Tctex1d2      |
| Clint1        | Hnrmpu        | Spry2         |  | Slc38a2       |
| Ccr4          | Hsp90aa1      | Pcm1          |  | Lgr5          |
| Gm3264        | Gk5           | Tspan2        |  | Rnf222        |
| Arl6ip1       | Id3           | Celf2         |  | Bach2         |
| Spns2         | Rap1b         | Serpib6a      |  | Mir181c       |
| Sreb1         | Mag1          | Pi4k2b        |  | Prkca         |
| Lzts3         | Chd2          | Ikbkb         |  | Apmap         |
| Nsmce1        | Kif16b        | Gpsm2         |  | Baz1b         |
| Capzb         | Eif5a2        | Slc2a1        |  | Ldlr          |
| Mex3c         | Commd7        | Serf2         |  | Tmem163       |
| Mpp2          | Golga5        | Rif           |  | Zswim3        |
| Mpv17l2       | Cyth3         | Wwox          |  | Esrra         |
| Lrrc27        | Gm13848       | Tnik          |  | Tsga10        |
| Ndst2         | Itgb1bp1      | 1700063H04Rik |  | Mettl26       |
| Mex3c         | Nmt2          | Tesk2         |  | Nip7          |
| Cntnap1       | Vamp2         | Ssx2ip        |  | Ap4b1         |
| 1600002D24Rik | Pdxdc1        | Clasrp        |  | Plekha7       |
| Mob1a         | Puf60         | Hibadh        |  | Thap1         |
| Slc16a11      | Sub1          | Figl1         |  | Eipr1         |
| G630071F17Rik | Tnfaip8       | Pgam5         |  | Ap4e1         |
| Gan           | Usb1          | Tbck          |  | Htr2a         |
| Push1         | Gm21190       | Heca          |  | Gm20604       |
| Rbm4b         | C2cd5         | Hadh          |  | Exosc3        |
| Nabp1         | G530011O06Rik | A330074K22Rik |  | Nuak2         |
| Dhrs7b        | Cfap20        | Wdr47         |  | Leng1         |
| Pcyt2         | Sema3f        | Rsrc2         |  | Tstd3         |
| Gm13283       | Rmnd5b        | Hist1h2ao     |  | Car4          |
| Gtf2a2        | Ier2          | Cdt1          |  | Eif3c         |
| Hmg20b        | Harbi1        | Atp5c1        |  | Tbx3          |
| Elmo2         | Tnks1bp1      | 1110034G24Rik |  | Gm14164       |
| Hist1h3i      | Slc12a4       | Atp8b1        |  | Specc1l       |
| Uchl5         | Spata2l       | 1700016H13Rik |  | Psmc1         |
| Tle6          | Snx2          | Mrm1          |  | Kctd12        |
| 1700030F04Rik | Plxnd1        | Ptma          |  | Agbl1         |
| Phf10         | C2cd2         | Trabd         |  | Mir5122       |
| Calu          | Klf11         | Tshz1         |  | 4930448I06Rik |
| 1500004A13Rik | Ppil6         | C3ar1         |  | Zfp213        |
| Atxn7l3       | Stxbp1        | Echdc1        |  | Gpc5          |
| Clic4         | Plbd2         | I830077J02Rik |  | Figl1         |
| Gm1821        | Snx8          | Rere          |  | Ankrd1        |
| G530011O06Rik | Grtp1         | Hlcs          |  | Snap23        |

|               |               |               |  |               |
|---------------|---------------|---------------|--|---------------|
| Tuba1b        | Slc41a3       | Hey2          |  | Mdm4          |
| Phf12         | E4f1          | Cdkn2b        |  | 3930402G23Rik |
| Akap10        | Cnmn3         | Morf4l1       |  | Trem12        |
| Crif3         | Usp53         | 8030442B05Rik |  | Med8          |
| Slc25a10      | Lonp1         | Ap1b1         |  | Mob1b         |
| Cyp2b23       | 2610042L04Rik | Atxn7l2       |  | Gtpbp4        |
| Clint1        | Tra2b         | Ric3          |  | St7           |
| Gm10941       | Frmf6         | Rgs3          |  | Hist1h4c      |
| Psmf3         | Calm2         | Cdc45         |  | A630001O12Rik |
| Relt          | Zfp326        | Mir7237       |  | Ubash3b       |
| Ppp1r13l      | Tal1          | Mpc2          |  | C330018D20Rik |
| Pias4         | Zswim2        | Abl2          |  | Dph3          |
| Fam114a2      | Lmna          | Pex16         |  | Mad2l1bp      |
| 6820431F20Rik | Ankrd50       | Slc38a11      |  | Eif3a         |
| Sbno1         | Btbd2         | Faim          |  | Tmem240       |
| Elob          | Pdk2          | Cep126        |  | Hist1h1c      |
| Adgrl1        | Elac2         | Abcf2         |  | Gm21944       |
| Usp36         | Slc5a6        | Onecut3       |  | Clhc1         |
| Kdm2b         | Ppp3ca        | Ltbp1         |  | Mir6398       |
| Pnrc1         | Mical3        | St3gal3       |  | Tmem203       |
| Rae1          | Speer4d       | Ddit4         |  | Mfn1          |
| Zfp608        | Csnk1g2       | Manbal        |  | Saysd1        |
| Sep-11        | Zfp688        | Acox3         |  | Ezr           |
| Ctnna1        | Hyal2         | Atf3          |  | Malat1        |
| Ttc25         | Cd44          | Ankrd9        |  | Gpx4          |
| Gatad1        | Exoc7         | Samd9l        |  | Pkm           |
| Mapk8         | Ssc4d         | Yipf4         |  | Klhl3         |
| 2410006H16Rik | Sugt1         | Aktip         |  | Commd7        |
| Rgs13         | Clec1a        | Pkn1          |  | Tmbim1        |
| B3galnt2      | Mief1         | Gm4262        |  | Mlf2          |
| Ly86          | Exoc6b        | Mapkbp1       |  | Tmpo          |
| Mllt1         | Atg7          | Lrch3         |  | Hspbap1       |
| BC005537      | Alox5ap       | Foxred1       |  | Edem2         |
| Zc3h12a       | Peg10         | Eif4b         |  | Trappc9       |
| Panx1         | Abhd5         | Gm13986       |  | Tmem131       |
| Eloa          | Ube4b         | Zscan21       |  | MsrA          |
| Gm5532        | Smyd4         | Spry1         |  | Chkb          |
| Kdm1b         | Btd           | Zscan12       |  | Usb1          |
| Esco1         | Zfp524        | Utp18         |  | Tspan18       |
| Rab21         | Slc25a10      | Slco2b1       |  | Prkca         |
| Rpl10a        | Myh9          | Popdc2        |  | Mfap3         |
| Wdr43         | Ube4b         | Itln1         |  | Arl16         |
| Gclc          | Gm10575       | Tmprss11c     |  | Pthr2         |
| Fam168b       | Mtdh          | Emcn          |  | Pdzk1ip1      |
| Hist1h4j      | Pak4          | Gm5122        |  | Slc9a8        |
| Lrp1          | Polr1d        | Slc16a10      |  | Gm3264        |
| Cep350        | Slc38a10      | Plin2         |  | Lgals3bp      |
| Bbc3          | Numbl         | A1413582      |  | Commd6        |
| Hadh          | Cisd2         | Bcat2         |  | Slc25a19      |
| Tspan17       | Atg4d         | Pdpk1         |  | Cdh5          |
| Odc1          | Pecam1        | Rgs3          |  | Raet1c        |
| Slc25a33      | Nemf          | Ptp4a3        |  | Extl2         |
| Tbxas1        | Pacsin2       | Mdm1          |  | Cox4i2        |
| Pdim1         | Eapp          | Igsf11        |  | Sprr2a3       |
| Coa6          | Twf2          | Mtpap         |  | Rapgef6       |
| Rad52         | Ctnnal1       | Cdk7          |  | Adprm         |
| Ppp1cc        | B4galt1       | Rasgef1b      |  | Kcnj16        |
| 1810013L24Rik | Ostc          | Trp53bp2      |  | Mir5100       |

|               |               |               |  |               |
|---------------|---------------|---------------|--|---------------|
| Hfe2          | Egln3         | Tfip11        |  | Isx           |
| Luc7l         | Adpgk         | Aktip         |  | Skil          |
| Zfp568        | Ppp2r5b       | St6galnac1    |  | Spns2         |
| F630040K05Rik | Rere          | Fmn1          |  | Alyref2       |
| Gm3230        | Spn           | Denr          |  | Ift46         |
| Milr1         | Ccnh          | Ccnd2         |  | Ddx5          |
| D5Ert615e     | Znrf2         | Eif2b2        |  | Atg7          |
| Napepld       | Bcl2l11       | Manea         |  | Flot2         |
| Trnau1ap      | Etohd2        | D130040H23Rik |  | Gm13285       |
| Rbm15b        | Trdmt1        | Gpx1          |  | 5730455P16Rik |
| Zfp12         | Axdnd1        | 5730435O14Rik |  | Tbcd          |
| Atg14         | Cinp          | Ccnc          |  | Atg7          |
| Gm13872       | D230017M19Rik | Unc5b         |  | Gm13285       |
| A430035B10Rik | Akap13        | Ppme1         |  | Skil          |
| 1700028E10Rik | Fez2          | Mcee          |  | Kdm6b         |
| Speer4cos     | Map3k9        | Prpf3         |  | Mmd           |
| Runx1         | Angel1        | Erich2        |  | Srsf1         |
| Birc2         | Epg5          | Scaf11        |  | Hist2h3c2     |
| Camsap2       | Aacs          | Svip          |  | Slfn14        |
| Pak2          | Wdr43         | Ppan          |  | Tk1           |
| Agbl1         | Zdhhc13       | Ei24          |  | Zfp652os      |
| Kiz           | Lrmda         | Tmem192       |  | LOC105242399  |
| Gm29685       | 4930405A10Rik | Hdac10        |  | Pkm           |
| Fbxo3         | 1700064J06Rik | Sptb          |  | Gm10033       |
| Sema4d        | Etohd2        | Mir7223       |  | Mmd           |
| D130040H23Rik | Gm20750       | Iqgap1        |  | Phb           |
| Ascc3         | Ptpn12        | Zfp784        |  | Sparc         |
| Socs3         | Rbm46         | Ube2v1        |  | Amotl2        |
| Foxk1         | Stxbp5        | Sf3b1         |  | Hrh1          |
| Scd1          | Adss          | Fyn           |  | Eftud2        |
| Stk17b        | Ptpn1         | Tarsl2        |  | 4930467E23Rik |
| Rgs18         | Wdr13         | Csf2ra        |  | Mmd           |
| Zfp628        | 2810408I11Rik | Yae1d1        |  | Gpm6a         |
| Ston2         | Prrc2b        | Tspan3        |  | Gm13285       |
| Gpm6a         | Slc34a1       | Slc4a4        |  | Sec24a        |
| Pak4          | Shf           | Bag5          |  | Ppp1r15a      |
| Fbxo34        | 1700019E08Rik | Scaf11        |  | Paf1          |
| Mir6388       | Vmn2r3        | Pitrm1        |  | Natd1         |
| Atp8b1        | Oit3          | 2310010J17Rik |  | Abcg2         |
| Rnu12         | Dhrs7b        | D330046F09Rik |  | Gm15326       |
| Snx10         | Nr4a1         | Psm4          |  | Dyrk3         |
| Hist1h4n      | Cdk12         | Tsk           |  | Chd2          |
| Lactb2        | Tnfaip8       | BC029722      |  | Hist1h2be     |
| Kptn          | Vdac2         | Zdhhc21       |  | Cenpw         |
| Ppil6         | Gxylt1        | Elmsan1       |  | Gm14005       |
| Txn1          | Pkn2          | Abraxas2      |  | Mbd6          |
| Smim3         | Dnajc3        | Antxr2        |  | Tbc1d7        |
| Zdhhc5        | Stk10         | Plekhh3       |  | Slco2a1       |
| Runx1         | Fez2          | Fbxo42        |  | Prpf18        |
| Atf6          | Rbp2          | Enho          |  | Mfsd10        |
| Memo1         | Snord116      | Ndufaf7       |  | Galk1         |
| Sreb1         | Ino80c        | Zfp746        |  | Tnfaip8       |
| Gtf3c5        | Zfp664        | Ak7           |  | 1110002J07Rik |
| Hist1h3h      | Cbwd1         | Arl15         |  | Nyx           |
| Prkar1b       | 4932435O22Rik | Dtwd1         |  | 4930467E23Rik |
| Nbeal1        | Irak3         | Zfp572        |  | Ltbp1         |
| Mir8102       | Rfxank        | Osgin2        |  | Eif3b         |
| Abi2          | Sdhc          | Prr5          |  | Mrpl52        |

|               |               |               |  |               |
|---------------|---------------|---------------|--|---------------|
| Gle1          | P2ry6         | Phf14         |  | Mrps34        |
| Mkl1          | 5031425F14Rik | Sipa1l3       |  | lcy1          |
| H2afx         | Rce1          | Fmn1          |  | Fam222b       |
| Klf13         | Mir210        | Camkk1        |  | Ptk2          |
| Ung           | Trp53bp2      | Arhgap19      |  | Emc7          |
| Ap1m2         | Srd5a3        | Ptdc1         |  | Cpsf6         |
| Ung           | Nup93         | Sf1           |  | Il17rd        |
| Ap3m1         | Sall3         | Mir6936       |  | Fam53a        |
| Bin2          | Dvl3          | Rere          |  | Csnk1g2       |
| Suclg1        | Speer4cos     | Ndrq2         |  | Mylk3         |
| Map2k6        | Fasl          | Sbk1          |  | Oraov1        |
| Clta          | Slc7a15       | Ifit1         |  | Msmmp         |
| Mtdh          | Gl28d2        | Espn          |  | Znhit2        |
| Shb           | Ssh2          | C530044C16Rik |  | Lrp8          |
| Cry1          | Pim3          | Cisd2         |  | Ptpn12        |
| Ap1m2         | Atp8b1        | Hspa5         |  | Gm16104       |
| Zbed4         | Cap1          | Uxs1          |  | Tpbgl         |
| Gm21119       | Bicd2         | Slc41a1       |  | Ubr2          |
| Lman2         | Sp7           | 3110045C21Rik |  | Sox7          |
| Med16         | lft172        | Dhrs1         |  | Zfp3          |
| Sertad2       | Nr2c2         | Dusp4         |  | Sec24d        |
| Yif1b         | Lfng          | Zfp217        |  | Rab17         |
| Notch2        | 4930548G14Rik | Lsm5          |  | Ap1m1         |
| Btg2          | Ptch1         | Rnf216        |  | Dhrs3         |
| Pnrc1         | Ablim1        | Dync1li1      |  | Dpp8          |
| Xxylt1        | Chid1         | Stat3         |  | Rara          |
| Tesk2         | Gm26689       | Rad51ap2      |  | Rcc2          |
| Gdpgp1        | Eif4ebp1      | Bbs2          |  | Tlnrd1        |
| Ptpr          | Ptgs2os2      | Mob3c         |  | Heatr5a       |
| Cfap20        | D10Jhu81e     | Ly86          |  | Neur13        |
| Vasp          | Dyrk2         | Sgo1          |  | 8430423G03Rik |
| Cited2        | Wwox          | Nkx6-1        |  | Speer4c       |
| Psma6         | Wee1          | Bod1l         |  | Ercc5         |
| Ctr9          | Mia3          | Ndrq1         |  | Prr5          |
| G3bp2         | Luc7l3        | Tbc1d13       |  | Dhrs7b        |
| Kcmf1         | Ntan1         | Gm1968        |  | Bcdin3d       |
| Ncbp3         | Gm2897        | Ppp1r12a      |  | Aipl1         |
| Med26         | lcy1          | Fen1          |  | Fra10ac1      |
| Gm7457        | Mad2l1        | Map3k7        |  | Zfp948        |
| Manbal        | Mrpl55        | 2900026A02Rik |  | Gm5129        |
| B4galt1       | Ubc           | Limch1        |  | Pcbp1         |
| 1700025G04Rik | Pgap2         | Zfp438        |  | D330050G23Rik |
| Rab4b         | Zmynd19       | Cdkn2aipnl    |  | Mir7227       |
| Tnfaip8       | Gpr171        | Cox20         |  | Cltc          |
| Lnpep         | Urgcp         | Abca7         |  | Pdss1         |
| Lockd         | Psmc3         | Atrnl1        |  | Cdc20         |
| Kcnj2         | Ppp1r13b      | Spns2         |  | Ccsap         |
| Atg7          | Tcirg1        | Mphosph9      |  | Scd2          |
| Hps6          | Med17         | Smarcd1       |  | Rnf216        |
| C2cd5         | Smad6         | Ptp4a3        |  | Cebpg         |
| Sh2b3         | Cr1f3         | Ldlr          |  | AU022793      |
| Sacs          | Rad23b        | Itgb6         |  | Brms1         |
| Alkbh5        | Dnaja1        | Mir5133       |  | 4631405J19Rik |
| Cd300a        | Camsap2       | Arhgap35      |  | 4930467E23Rik |
| Itgb2         | Ebf1          | Litaf         |  | Ppargc1b      |
| Cyb5r1        | Zfand2b       | Got1          |  | BC021767      |
| Sh2b3         | Retreg3       | Ldlrad3       |  | Kbtbd2        |
| Snx22         | Psmg1         | Samd4b        |  | Asic4         |

|               |               |               |  |               |
|---------------|---------------|---------------|--|---------------|
| Adora2a       | Rab5c         | Appl1         |  | Abi2          |
| Hipk1         | Eloa          | Gps2          |  | Rpl31         |
| Taf9          | Bbc3          | Dcun1d4       |  | Chrna9        |
| Usp1          | Osbp          | Lonrf1        |  | Mis18a        |
| Grk6          | Tead1         | Six5          |  | Npepps        |
| Ptpre         | Zfand2b       | Rnu12         |  | Ckap2         |
| Vkorc11       | Pnrc1         | Gnaq          |  | Synrg         |
| Pelp1         | Klf16         | Stxbp4        |  | Tubb3         |
| Kpna2         | Plscr3        | Gbx2          |  | Ninj2         |
| Alkbh5        | Snord118      | Spata13       |  | Add1          |
| Atg7          | Hist2h3c1     | Dsn1          |  | Ache          |
| 2900052L18Rik | Mrps18b       | Mgat1         |  | Cdk19         |
| Ctnnbip1      | Gpatch8       | Mir152        |  | Zfp991        |
| Ift46         | Pigs          | Unc50         |  | Med11         |
| Kbtbd7        | Tom1          | Spdya         |  | Gm13034       |
| Rex2          | 2410006H16Rik | Hrh1          |  | Tmem140       |
| Igf1r         | Nup107        | Msl1          |  | Fbxl19        |
| Rpn2          | Abcb9         | Pgap3         |  | Slc16a14      |
| Ints3         | Cyld          | Aco2          |  | Il12a         |
| D230017M19Rik | Pigl          | Rad9b         |  | Tefm          |
| Dgkeos        | Aco1          | Gsk3b         |  | Ormd3         |
| Elac2         | Pex10         | Paox          |  | Tpm3          |
| Erd1          | Id1           | LOC105242399  |  | Mir23a        |
| Pgp           | Nfyc          | Ccnd3         |  | Zswim7        |
| Plcg2         | Scarb1        | Zfp78         |  | Ints9         |
| Capn2         | Ndc1          | Ano10         |  | Hrh1          |
| Chd8          | Elmo2         | Gtf2a1        |  | Gm3696        |
| Cluh          | Atp2b4        | Nras          |  | Socs3         |
| Dennd6a       | Psme4         | Suco          |  | Vps25         |
| Ddx41         | Syncrip       | Eif2b1        |  | Alkbh5        |
| Gins1         | Cdt1          | Traf4         |  | Mnt           |
| Eftud2        | Polk          | Cep68         |  | Atg7          |
| Dynll2        | Igf2bp3       | 2410002F23Rik |  | Mtss1         |
| Ube2c         | Btg1          | Acyp1         |  | Tjp2          |
| Gm5797        | Cenpn         | Fbxo33        |  | Zfpm1         |
| Gm10575       | Srxn1         | Nedd4l        |  | Gm13872       |
| Rhbdd3        | Kbtbd2        | Tmem131       |  | Cdkn2aipnl    |
| Per1          | Cmc2          | Fut11         |  | Gpr39         |
| Per1          | Larp1         | Tdrd7         |  | Golm1         |
| Abca7         | Mark4         | Eif2ak4       |  | Hs1bp3        |
| Slc38a10      | Pitx3         | Cd180         |  | Ttc7b         |
| Hlf           | Homer3        | Shroom3       |  | Fam207a       |
| Tnpo1         | Stau1         | Hdgf          |  | Ptpn          |
| Adnp          | Ndel1         | Wnk1          |  | Mir1983       |
| Tmem131       | Ndst2         | Cyb561d1      |  | Fggy          |
| Sidt2         | MacroD2       | Gngt2         |  | Elac2         |
| Tmem39b       | Gstm7         | Hist1h2ag     |  | Runx1         |
| Cib3          | Ddb1          | Ddias         |  | Slc37a4       |
| Ifngr2        | Ercc2         | Zc3h15        |  | Thg1l         |
| Mcl1          | Fbxo30        | Ncdn          |  | Nup153        |
| Pold3         | Tspan18       | Acadvl        |  | Mpv17         |
| Abhd17a       | Mrp14         | Tmem39b       |  | Rnf19a        |
| Snx8          | Scpep1        | Fbxo47        |  | Itga4         |
| Ppard         | Snora16a      | 1700021N21Rik |  | Cdh5          |
| Spata2l       | Gm21057       | Hist1h4n      |  | 1700020L24Rik |
| Usp40         | Sqle          | Tbc1d7        |  | Mir3960       |
| Cep70         | Atf4          | Trappc10      |  | Ppm1d         |
| Mrv1          | Map3k14       | Pigp          |  | Fam222b       |

|               |               |               |  |         |
|---------------|---------------|---------------|--|---------|
| Mir378b       | Med13l        | Zfp335        |  | Gm10413 |
| Cep19         | Ddhd1         | Nabp2         |  | Ubash3b |
| Ackr2         | Ankrd54       | Dyrk1b        |  |         |
| Pard6b        | 4930559C10Rik | Gm28178       |  |         |
| Dusp18        | 9330102E08Rik | Nop2          |  |         |
| Oser1         | Tmem41b       | Eif5          |  |         |
| Noxa1         | Cenpw         | Snhg5         |  |         |
| Gmds          | Errfi1        | Aunip         |  |         |
| Rps12         | Pcif1         | Efcab11       |  |         |
| 4930434J06Rik | Kdm2b         | Tmem87a       |  |         |
| Mir132        | Mmd           | Gnpnat1       |  |         |
| Rab33b        | Edem1         | S1pr1         |  |         |
| Gm10646       | Atp2b1        | Mphosph9      |  |         |
| 1700017B05Rik | Mlec          | Lsm11         |  |         |
| Slc46a2       | Ttc39b        | Keap1         |  |         |
| Stxbp5        | Dnaja2        | Mir6769b      |  |         |
| Tbc1d8        | Snx22         | Maff          |  |         |
| Parp6         | Atp2b1        | Maff          |  |         |
| St6galnac1    | Rbpj          | Kmt5c         |  |         |
| Heatr5a       | Mmd           | Vamp3         |  |         |
| Stx12         | Spen          | Sar1a         |  |         |
| Tnfaip8       | 1600023N17Rik | Oxsr1         |  |         |
| Kif16b        | Cdk19         | Sbds          |  |         |
| Mar-03        | Cep70         | Rnf222        |  |         |
| Prx           | BC005537      | Rflnb         |  |         |
| AU040320      | Rgp1          | Zfyve27       |  |         |
| Atp6v0a1      | Ccdc28a       | G3bp2         |  |         |
| Cox5a         | Crebl2        | Tbc1d20       |  |         |
| 5031425E22Rik | Gm10354       | Ubl3          |  |         |
| Rpe           | 5031425E22Rik | Rpn2          |  |         |
| Rock2         | 9130011E15Rik | Ap3m1         |  |         |
| Ccdc146       | Srsf4         | Mtfr1         |  |         |
| Copg2         | Sik2          | Snhg3         |  |         |
| Ryr2          | Mir17         | Hist1h4d      |  |         |
| Noxa1         | Ufsp1         | Zfand3        |  |         |
| Zc3hav1       | Cd300a        | Card19        |  |         |
| Rasal1        | C330018D20Rik | Gm2518        |  |         |
| Pja2          | Xpo6          | Ccdc9         |  |         |
| Gm28178       | Vav2          | Otub1         |  |         |
| Cxcr5         | Tbl2          | Lyst          |  |         |
| Atxn7l2       | Acads         | Eaf2          |  |         |
| Mbd2          | Cep68         | Ralgps1       |  |         |
| Arhgap33      | Rgs12         | B930059L03Rik |  |         |
| Camk1d        | Psen1         | Ggps1         |  |         |
| Pstpip1       | 9130011E15Rik | Klc1          |  |         |
| Sdad1         | Dcakd         | Lamp1         |  |         |
| Cuta          | Aldh9a1       | Stag1         |  |         |
| Cisd2         | Nphp3         | Usp15         |  |         |
| Cpt2          | Lnpep         | Gpr19         |  |         |
| Igsf3         | Mapre1        | Mphosph8      |  |         |
| St6galnac1    | Prrc2a        | Arfip1        |  |         |
| Txnrd1        | Gm20605       | Stat1         |  |         |
| Kank2         | Tvp23b        | Tcf7          |  |         |
| Swap70        | Shb           | Sap30         |  |         |
| Ackr2         | Mir8102       | Pisd-ps1      |  |         |
| Rfx3          | Tmed1         | Hk1           |  |         |
| Eri2          | Kcnj16        | Lrrc3         |  |         |
| Cpne3         | Asic1         | Rnf5          |  |         |

|               |               |               |  |  |
|---------------|---------------|---------------|--|--|
| Tgfbra1       | Nucb1         | Ireb2         |  |  |
| Hist1h2ao     | 1110059G10Rik | Dohh          |  |  |
| Cdc42ep4      | Ppp1cc        | Pard6b        |  |  |
| Rbm46         | Dolpp1        | Slc36a1os     |  |  |
| Cdc16         | Zfp706        | Rbpms2        |  |  |
| Mc2r          | Hgfac         | Tmem97        |  |  |
| Mir3961       | Ist1          | Axin2         |  |  |
| Zfp655        | Gm12159       | Sgf29         |  |  |
| Rbm39         | Kbtbd7        | Ggps1         |  |  |
| Ccne1         | Gm5796        | Lrrc74a       |  |  |
| Trmt13        | Ncl           | Ttc13         |  |  |
| Ptgs2os2      | Pmm1          | Plk3          |  |  |
| Cdk17         | Mafk          | Hspb11        |  |  |
| a             | Rwdd3         | Tgif1         |  |  |
| Mir8111       | Fam214b       | 4930572O03Rik |  |  |
| Itgb3bp       | Ubr3          | Bsdc1         |  |  |
| Creg1         | Ep400         | Thns11        |  |  |
| Ccdc80        | Adgrg1        | Parp16        |  |  |
| Fbxo46        | Nck2          | Sphk2         |  |  |
| Fbxo30        | Tbc1d1        | Rheb          |  |  |
| Stmnd1        | Sae1          | Zmym5         |  |  |
| Limd2         | Slc17a8       | Ltc4s         |  |  |
| Ncor2         | 1700008O03Rik | Cdc25a        |  |  |
| Tiam1         | Tbc1d2        | Luc712        |  |  |
| Foxl1         | Borcs5        | Tacc1         |  |  |
| Add3          | Caprin1       | Tmem167b      |  |  |
| Slc17a4       | Zbtb9         | Poldip2       |  |  |
| Med4          | Tbc1d2        | Limd2         |  |  |
| Nus1          | Msmo1         | Tacc3         |  |  |
| Slc38a11      | Sec61a2       | Prkar1b       |  |  |
| Psm1          | Dnajb8        | Map2k6        |  |  |
| Cep152        | Ccdc14        | Fchsd2        |  |  |
| Flt1          | Tuba1c        | Akap8l        |  |  |
| Kansl2        | Lifr          | Smc5          |  |  |
| Efcab14       | Acaa2         | Coa4          |  |  |
| 2610005L07Rik | Pcgf3         | Mbd3          |  |  |
| Rptor         | Vps13a        | Spata1        |  |  |
| Scaf4         | Pex11b        | Malat1        |  |  |
| Efcab2        | Jarid2        | Thra          |  |  |
| Foxk2         | Acaa2         | Thra          |  |  |
| Cpsf4         | Psph          | Foxk1         |  |  |
| Tpst2         | Pfkip         | Ppfia4        |  |  |
| Gpn3          | Capn7         | Rcor3         |  |  |
| Gpatch2l      | Tbl1xr1       | Der1          |  |  |
| Cttn          | Cxcr5         | A630001O12Rik |  |  |
| Gm536         | Pex11b        | Gatc          |  |  |
| Klf13         | Ifnar2        | Sacm1l        |  |  |
| Pabpc1        | AW554918      | Tmem205       |  |  |
| Parp16        | Cnm4          | Klc3          |  |  |
| Ubf1          | Aldh2         | Rrp8          |  |  |
| 0610010K14Rik | Rap2b         | Urod          |  |  |
| Pgpep1        | Dennd2a       | Gm21992       |  |  |
| Ccnk          | Gp1ba         | Ndfip1        |  |  |
| Zfand4        | Tbc1d8        | Ccdc85b       |  |  |
| Rap2b         | Flt1          | Rrp9          |  |  |
| Tmem251       | Smim3         | Tmpo          |  |  |
| Ndc1          | Mnd1          | Csf1          |  |  |
| Efcab2        | Coa7          | 1190002N15Rik |  |  |

|           |               |               |  |  |
|-----------|---------------|---------------|--|--|
| Kcnj16    | Evl           | Eme1          |  |  |
| Tmpo      | Maff          | Zfp526        |  |  |
| Prrc2b    | Gm5797        | Gtpbp4        |  |  |
| Agrn      | Acer3         | Chd8          |  |  |
| Gm10433   | Ush2a         | Ralgapb       |  |  |
| Snhg8     | Fam13b        | Yipf2         |  |  |
| Agl       | Rplp1         | Ing2          |  |  |
| Srm       | Rab39         | Hectd1        |  |  |
| Hnrnpa3   | Gm527         | Pkn3          |  |  |
| Ints6     | 2900093K20Rik | Plcg2         |  |  |
| Trafd1    | 1810055G02Rik | Atp13a3       |  |  |
| Eif4g2    | Snopc3        | Cactin        |  |  |
| Gm17019   | Snrk          | Rbm14         |  |  |
| Cbfa2t2   | Dhx35         | Hmbs          |  |  |
| Cxzc5     | Urm1          | Tuba1b        |  |  |
| Lamtor1   | Csgalnact1    | Agps          |  |  |
| Cep85     | Hspa8         | Cxzc5         |  |  |
| Dapp1     | Gnaz          | Hspa4         |  |  |
| Ccr1      | 1700029H14Rik | Tpm3          |  |  |
| Trp53inp2 | Cmah          | Lbr           |  |  |
| Guk1      | Gars          | B4galt5       |  |  |
| Spns2     | Acadsb        | Elovl6        |  |  |
| Clec9a    | Zfp106        | E2f2          |  |  |
| Usp35     | Myo1c         | Ankfy1        |  |  |
| Atp6v0c   | Spcs3         | Stk17b        |  |  |
| Rapgef6   | Nudcd3        | Dapp1         |  |  |
| Gnl3      | Myo1c         | Mfsd2b        |  |  |
| Dusp2     | Gtf2f1        | Slc25a11      |  |  |
| Paqr7     | Cand1         | Bscl2         |  |  |
| Mir33     | Zfp7          | Pno1          |  |  |
| Hrh1      | Hrh1          | Zfp541        |  |  |
| Bap1      | Hspa8         | Scamp4        |  |  |
| Plekho2   | Amotl2        | Sqstm1        |  |  |
| Mir762    | Osbp19        | Rab11fip4os2  |  |  |
| Nudt18    | Chtf18        | Abl2          |  |  |
| Hexdc     | Tyk2          | Cyr61         |  |  |
| Lbr       | Itsn1         | Defa21        |  |  |
| Ssh2      | Rab39         | Sep-09        |  |  |
| Mob1b     | Sun2          | Zfand4        |  |  |
| Dmwd      | Ppara         | Prdx1         |  |  |
| Tpt1      | Dyrk3         | Zpbp2         |  |  |
| Gm5796    | Cfdp1         | Dhx33         |  |  |
| Tnip1     | Nbeal1        | Sirt4         |  |  |
| Taf5l     | Efna3         | Pgam1         |  |  |
| Tmx1      | Chrb1         | Eif1          |  |  |
| Gm10354   | Bclaf3        | Jun           |  |  |
| Birc5     | Osbp18        | Rnf114        |  |  |
| Kdelr2    | 4930455J16Rik | Chmp7         |  |  |
| Psmg1     | Tedc2         | Cic           |  |  |
| Neat1     | Dock4         | Srd5a3        |  |  |
| Mbtps1    | Bap1          | Cfl1          |  |  |
| Dmrtb1    | Rpap3         | Slc31a1       |  |  |
| Tmem158   | Gtf2i         | Tecr          |  |  |
| Znrf3     | Cnot4         | Btf3l4        |  |  |
| Alox5ap   | Tubgcp6       | Gm21119       |  |  |
| Zfp688    | Rars          | 1190002N15Rik |  |  |
| Slc35f5   | Arih2         | 1110065P20Rik |  |  |
| Wee1      | Slc12a7       | Xpo1          |  |  |



|               |               |               |  |  |
|---------------|---------------|---------------|--|--|
| Dyrk1a        | Msl1          | Dus3l         |  |  |
| Tmf1          | Pik3r1        | Wscd1         |  |  |
| Syde2         | F630040K05Rik | Camsap1       |  |  |
| Polr2a        | Bub1          | 9430091E24Rik |  |  |
| Isy1          | Lyst          | Fam229a       |  |  |
| Fmnl3         | Plrg1         | Chtop         |  |  |
| Pgap2         | Zfp608        | Blmh          |  |  |
| Milr1         | Rfk           | Tfrc          |  |  |
| Mtch1         | Zfp944        | Cd164         |  |  |
| Mbtps1        | Dlgap1        | Fnbp4         |  |  |
| Ndc80         | Gypc          | Ap2a1         |  |  |
| Etohd2        | Ikzf2         | Rrp12         |  |  |
| Itln1         | Npat          | D8ErtD738e    |  |  |
| Unk           | C230037L18Rik | Zc3h18        |  |  |
| Slc7a5        | Zfand4        | Ube2l3        |  |  |
| Rpl3          | Dolk          | Foxo3         |  |  |
| Tnfaip2       | Depdc5        | Smarca5-ps    |  |  |
| Papd5         | Kmt2a         | Csde1         |  |  |
| Hnrnpf        | Tmem256       | Celf1         |  |  |
| Paqr7         | Ankrd11       | Nme2          |  |  |
| Smarca4       | Birc6         | Srsf11        |  |  |
| Gm11127       | Prkcd         | Rffl          |  |  |
| Acvr1b        | Tctex1d2      | Klrb1b        |  |  |
| Btf3l4        | Ksr1          | Arl4d         |  |  |
| 5430405H02Rik | Btg2          | Ube2s         |  |  |
| A330074K22Rik | Sap130        | Thap1         |  |  |
| Hist1h2bl     | Spg21         | Mylip         |  |  |
| Hand1         | Phc2          | Pik3r3        |  |  |
| Hist1h1d      | Dhodh         | Pigf          |  |  |
| Fbxo48        | Nfe2l1        | Garnl3        |  |  |
| Zcchc14       | Ywhag         | Ift140        |  |  |
| Abcf1         | U2af1         | Xpot          |  |  |
| Tmem250-ps    | Nxn           | 4930429F24Rik |  |  |
| Arid4a        | Cd3eap        | Ythdf2        |  |  |
| 3110056K07Rik | Pop7          | Dag1          |  |  |
| Matr3         | Brd7          | Mex3b         |  |  |
| Haspin        | Klf3          | Myh9          |  |  |
| Wapl          | Cd3eap        | Tug1          |  |  |
| Atl2          | Pim3          | Tgoln2        |  |  |
| Sdccag3       | Rell1         | Rrp12         |  |  |
| Nt5dc3        | Ube2c         | Cd164         |  |  |
| Nt5dc3        | Rex2          | 4921524J17Rik |  |  |
| Ric3          | Ncapp2        | Bcl7b         |  |  |
| Tpra1         | Tax1bp1       | Arid1a        |  |  |
| Smtnl2        | Sesn2         | Pdik1l        |  |  |
| Sfpq          | Rgs2          | Gm3230        |  |  |
| Abhd12        | D030047H15Rik | Ptp4a1        |  |  |
| Gtf2a1        | Ift57         | Cyp2b23       |  |  |
| Sqstm1        | Arnt          | Smarca5-ps    |  |  |
| Fkbp8         | Figl1         | Kif17         |  |  |
| Grap2         | Mir22hg       | Stil          |  |  |
| H1f0          | Mon2          | Taf11         |  |  |
| D030028A08Rik | Tab2          | Hist1h4c      |  |  |
| Hint1         | Oaz2          | Rffl          |  |  |
| Clpx          | Smg9          | Sptbn1        |  |  |
| Chst12        | Xpnpep1       | Ablim2        |  |  |
| Gm3383        | Gmnn          | Gle1          |  |  |
| Trmt1l        | Slc25a39      | Fars2         |  |  |

|               |               |               |  |  |
|---------------|---------------|---------------|--|--|
| Tuba1c        | Blvrb         | Ctgf          |  |  |
| Ctdsp2        | Pitpna        | Cldn5         |  |  |
| Faap100       | Gm3500        | Pcdh7         |  |  |
| Znhit3        | Gm10687       | Tusc1         |  |  |
| Cbfa2t3       | Gse1          | Edrf1         |  |  |
| Scarna2       | Adh5          | Hacd3         |  |  |
| Arhgap25      | Hat1          | Rcbtb1        |  |  |
| Mir21c        | Mef2c         | Atad2         |  |  |
| Cyld          | Vps13d        | Arl16         |  |  |
| Afg3l1        | Zfp78         | 3110002H16Rik |  |  |
| Mir6352       | Gas5          | Dcp2          |  |  |
| F10           | 1110002L01Rik | Gm13212       |  |  |
| Sik3          | Strn          | Eif3d         |  |  |
| Rab3d         | Ints10        | Taf1d         |  |  |
| Ctgf          | Smarcc1       | Epha7         |  |  |
| Snhg5         | Gzf1          | Lcmt1         |  |  |
| Prkab1        | Slc2a3        | Ccdc107       |  |  |
| Atic          | Ppp1r18       | Rabl3         |  |  |
| Ccdc34        | Rras          | Cgrrf1        |  |  |
| Btnl10        | 4732414G09Rik | Clec4g        |  |  |
| Btnl10        | Scarletttr    | Mapkapk2      |  |  |
| Ctr9          | Hnrmpf        | Ldlrad3       |  |  |
| Bach2         | Prickle1      | Heatr5a       |  |  |
| Fdx1l         | Dnajb1        | Pdp2          |  |  |
| 1700027F06Rik | Ergic3        | Nub1          |  |  |
| Bbs2          | Prc1          | Gata3         |  |  |
| Rpl37         | Ralgapa2      | Gm6117        |  |  |
| Wisp3         | Pnkd          | B330016D10Rik |  |  |
| Oaz2          | Rngtt         | Etrf1         |  |  |
| Rab27b        | Tcf7          | Camk2g        |  |  |
| Fut10         | Map2k1        | Relb          |  |  |
| Trp53         | Med6          | Ormdl1        |  |  |
| Mrpl33        | Tubb5         | Apc           |  |  |
| Acaa2         | Wapl          | Pan3          |  |  |
| Tmed7         | Hsp90ab1      | Sgta          |  |  |
| Mmab          | Tac4          | Atad2b        |  |  |
| Bach1         | Eil           | Zfp628        |  |  |
| Hrh1          | Fam69a        | Eif1b         |  |  |
| Cenpw         | Ypel5         | Add3          |  |  |
| Ropn1l        | Higd1a        | Fkbp8         |  |  |
| Dpysl2        | Ppp2ca        | Pdcd4         |  |  |
| Ptch1         | Rae1          | Epas1         |  |  |
| Ssfa2         | Eftud2        | Fam118a       |  |  |
| Psmc4         | Nectin2       | Kdm4a         |  |  |
| 1700031P21Rik | Mir181c       | Insig2        |  |  |
| Sox7          | Sh3bgrl3      | Csnk2a1       |  |  |
| Arl4c         | Eno1          | Prr5          |  |  |
| Dcaf10        | Asf1a         | Ficd          |  |  |
| Slc24a3       | Ppdpf         | Lama5         |  |  |
| Sod2          | Gpn3          | Nedd4         |  |  |
| Wwp1          | Gm46545       | Mgst2         |  |  |
| Sgsm3         | Dusp7         | Sesn3         |  |  |
| 1700052K11Rik | Atmin         | Tspan13       |  |  |
| Pepd          | Rpl31         | Selenof       |  |  |
| Ralgps1       | Chmp6         | Hnrnpul2      |  |  |
| Fgyy          | Serinc5       | Crkl          |  |  |
| Cpne7         | Wbp2          | Cenpf         |  |  |
| Timm50        | Trp53inp1     | Sp8           |  |  |

|               |               |               |  |  |
|---------------|---------------|---------------|--|--|
| Slc17a2       | Gm4890        | Hectd4        |  |  |
| Rasa1         | Arpc1b        | Mtmr12        |  |  |
| Rnaset2a      | Katnb1        | Cep57         |  |  |
| CcpG1         | Plk3          | Stmnd1        |  |  |
| Vav2          | Hist1h1e      | Otulin        |  |  |
| Rwdd3         | Sox7          | Zbtb17        |  |  |
| Acaa2         | Gm17019       | Samd4b        |  |  |
| Tmem167       | Tnip1         | GltP          |  |  |
| PrCP          | Esd           | Scyl2         |  |  |
| Egr3          | Sep-10        | Tubb2a        |  |  |
| D8ErtD738e    | Reep3         | Tex10         |  |  |
| Mtg2          | Pisd-ps2      | Plcl2         |  |  |
| Crem          | Ano9          | Ran           |  |  |
| Nup50         | Zranb1        | Prtg          |  |  |
| Lgr6          | Ss18l2        | Pag1          |  |  |
| Dgcr8         | Fdxr          | Aldh4a1       |  |  |
| Dhrs9         | Klf13         | Tmem51        |  |  |
| Acadsb        | Eloc          | Pdcd5         |  |  |
| Grcc10        | Ywhaz         | Faf1          |  |  |
| Ankmy2        | Nme1          | Ccr4          |  |  |
| Rnps1         | BC107364      | 5031425E22Rik |  |  |
| D230017M19Rik | Hnrmpm        | Homez         |  |  |
| Dnajc3        | Ifnar1        | Nkiras1       |  |  |
| Paip2         | Ctps          | 4932412D23Rik |  |  |
| Ilf3          | Zfp367        | Dctn3         |  |  |
| Tmem120b      | Lamc1         | Mapt          |  |  |
| Rrp8          | Ctps          | Mtdh          |  |  |
| Spry1         | Map4          | Cdip1         |  |  |
| 1810010D01Rik | Zmym6         | Zfp2          |  |  |
| Ankrd28       | Fkbp3         | Tomm7         |  |  |
| FrmD4b        | Tctn1         | Coq8a         |  |  |
| Lyrm9         | Igsf3         | Gamt          |  |  |
| Ywhaz         | Ctbs          | Rnf26         |  |  |
| Ifitm3        | Tnfrsf12a     | Gtf3c5        |  |  |
| Tmem60        | Mlxip         | Slc7a1        |  |  |
| Mdm1          | Zswim6        | Zcchc14       |  |  |
| Asb1          | Nat10         | Car8          |  |  |
| Mki67         | Trmt2a        | 4930434J06Rik |  |  |
| Asf1a         | Mapk9         | Fbl           |  |  |
| Camkmt        | Map4          | Vmn2r-ps11    |  |  |
| Srp9          | H3f3a         | Kans1         |  |  |
| Lrrc74b       | Slc9a3r1      | Arhgef17      |  |  |
| Pygo2         | Gm21119       | 1110008P14Rik |  |  |
| Ubxn1         | Hic2          | Gar1          |  |  |
| Klhl24        | Zfp821        | 4933430I17Rik |  |  |
| Mrpl32        | Rad17         | Crim1         |  |  |
| Ncaph         | Opn3          | Nop53         |  |  |
| Ndufa13       | Mapk3         | Gmpr          |  |  |
| Mir6546       | Fzd9          | Zcchc24       |  |  |
| Usp1          | Zfp672        | Aip           |  |  |
| Cnot10        | Bicd1         | Rbsn          |  |  |
| Zscan22       | 4930526I15Rik | Ctla2b        |  |  |
| Alkbh4        | PsmA3         | Pik3ip1       |  |  |
| Sgms1         | Gm21119       | Zmym3         |  |  |
| Fam109b       | Tec           | 1700031P21Rik |  |  |
| A530013C23Rik | Rnf169        | Ptpn6         |  |  |
| Nkd1          | Banp          | Rara          |  |  |
| Ddx21         | Eprs          | Nub1          |  |  |

|               |               |               |  |  |
|---------------|---------------|---------------|--|--|
| Tmbim1        | Cdc42se2      | Elov5         |  |  |
| Pih1d1        | Ywhae         | Cdca7l        |  |  |
| Rnf149        | Atp13a2       | Ctdspl2       |  |  |
| Faf1          | BC107364      | Ankrd10       |  |  |
| Tmcc3         | Mrps24        | Tcaim         |  |  |
| Twsg1         | Tmem229b      | Dennd2c       |  |  |
| Herc1         | Cirbp         | Glul          |  |  |
| Draxin        | Sh3gl1        | Foxg1         |  |  |
| Ss18l1        | Dr1           | Mmadhc        |  |  |
| Cep72         | Ptpn11        | Tnfaip8l1     |  |  |
| Csrnp1        | Rock2         | Calr          |  |  |
| Ptdss2        | Btbd19        | Large1        |  |  |
| Cdv3          | Aamp          | Tars          |  |  |
| Bard1         | lppk          | 1700052K11Rik |  |  |
| Slc30a9       | Rab11b        | Pdcl3         |  |  |
| Add1          | Usp36         | Lmo7          |  |  |
| Glt28d2       | Add3          | Pdim7         |  |  |
| Lsm12         | Lipt2         | Slc39a3       |  |  |
| Ccdc138       | Wdr1          | Zxdc          |  |  |
| Xylt2         | Gm21190       | Ctnn          |  |  |
| Espn          | Wee1          | Fanca         |  |  |
| Pdk1          | Smdt1         | H1f0          |  |  |
| Mon2          | Ubc           | Ccdc134       |  |  |
| Ccr1          | Ahctf1        | Lmbrd1        |  |  |
| Lyl1          | Hrh1          | Arhgap12      |  |  |
| Hist1h2ap     | Ip6k2         | Slc7a6os      |  |  |
| Ptp4a2        | Ttc41         | Cct8          |  |  |
| Crispld2      | Dact3         | Slc15a4       |  |  |
| Hhex          | Smarca5-ps    | Tdp2          |  |  |
| Sgms1         | Nipa2         | Fbxw2         |  |  |
| Inpp5a        | G530011O06Rik | Erich1        |  |  |
| Sfr1          | Mar-02        | Rcan3         |  |  |
| Mir21a        | Znhit2        | Tspan3        |  |  |
| Frmf6         | Usp49         | Mir681        |  |  |
| Arhgap23      | Pgrmc2        | B230217C12Rik |  |  |
| Rgs10         | Mirlet7a-1    | Dusp8         |  |  |
| C77080        | Prkab2        | Ctsd          |  |  |
| Gm5458        | lfng1         | Hook1         |  |  |
| Hmga1         | Abca1         | Wdr4          |  |  |
| Sema4d        | Fam187b       | Ppp1r21       |  |  |
| Atad2         | St3gal3       | Zc3h12a       |  |  |
| Gm5797        | Pemt          | Akirin2       |  |  |
| Hspa5         | Atg7          | Ckap2         |  |  |
| Atg16l2       | Pacrgl        | Hspa14        |  |  |
| Sgf29         | Tram2         | Psap          |  |  |
| Gp1ba         | Egr3          | Mcur1         |  |  |
| Pbm1          | Gclc          | Acbd4         |  |  |
| Pim3          | Snd1          | Ptprc         |  |  |
| Trap1         | 4930511A08Rik | Ppard         |  |  |
| Ppp1r13b      | Ppwd1         | Gata2         |  |  |
| Pias3         | Tmem251       | Gm6634        |  |  |
| Prpf40b       | Specc1l       | Vgll4         |  |  |
| Ccdc43        | Ncaph2        | Entpd7        |  |  |
| 3110045C21Rik | Fam96b        | Zfp637        |  |  |
| Drg2          | Mtf2          | Pprc1         |  |  |
| Cpsf6         | Nampt         | Slc24a4       |  |  |
| Mageb3        | Tppp          | Wwtr1         |  |  |
| Rnf216        | Cep295        | Ccdc191       |  |  |

|               |               |               |  |  |
|---------------|---------------|---------------|--|--|
| Fbxo11        | Atrn          | Lin28b        |  |  |
| E4f1          | Fam96b        | Rpl5          |  |  |
| Med1          | Prr12         | Rab38         |  |  |
| Ahcy          | Map7          | Mcm4          |  |  |
| Ckap5         | Stn1          | Rhpn1         |  |  |
| Tpm1          | Kpna3         | Atg101        |  |  |
| Atp13a2       | Fam198b       | Tdrd1         |  |  |
| Jpt2          | Insig1        | Gm9530        |  |  |
| Gatc          | Ccser2        | Ube2q2        |  |  |
| Snx15         | Hip1          | 1700060C20Rik |  |  |
| Srsf9         | Vcl           | Ptchd1        |  |  |
| Srp68         | Ccdc74a       | 2310043O21Rik |  |  |
| Clptm1        | Eef1e1        | Ap2s1         |  |  |
| Rnf126        | Dennd4a       | Sft2d1        |  |  |
| Nr1h2         | Ano1          | Dcaf11        |  |  |
| Atp6v1d       | Rwdd2a        | Ankrd44       |  |  |
| Ubash3b       | Foxo6         | Osgin1        |  |  |
| Rab6a         | Eci1          | Rras2         |  |  |
| Eif4g3        | Ube2d2a       | Cdca2         |  |  |
| Lsm11         | 4930555G01Rik | Zfp959        |  |  |
| Caprin1       | Gm10406       | Zfp395        |  |  |
| Rpl32         | Ralgps1       | Nnt           |  |  |
| Ahctf1        | 2900052L18Rik | Zc3h3         |  |  |
| Erf           | Crot          | E2f7          |  |  |
| Hist1h1e      | Tmem64        | Pkmyt1        |  |  |
| Mgat1         | Dusp2         | Exo1          |  |  |
| Mknk1         | Klhl26        | Lonp2         |  |  |
| 2810410L24Rik | Gsdmc         | Slc35a1       |  |  |
| Mfsd5         | Naa20         | Sprr2a2       |  |  |
| Cenpm         | Tm2d3         | Ctdspl        |  |  |
| Phykpl        | Raly          | B3gat3        |  |  |
| Vmac          | Gm10069       | Cep5711       |  |  |
| Kdm3a         | Pold3         | Amot          |  |  |
| D030028A08Rik | Tpt1          | Der2          |  |  |
| Mrpl20        | Tnfaip3       | Alkbh3        |  |  |
| Chd2          | Mknk1         | Lca5          |  |  |
| Ptpn1         | Ehbp1         | Rbm38         |  |  |
| A930024E05Rik | Akap5         | Pigyl         |  |  |
| Hist1h4h      | LOC105242399  | Zfp143        |  |  |
| Xpc           | Slc2a13       | Jak1          |  |  |
| Btbd19        | Csf2ra        | Jpt1          |  |  |
| Hat1          | Fam57b        | Itm2b         |  |  |
| Larp7         | Ppa1          | Tmc6          |  |  |
| Mia2          | Mrpl52        | Atg7          |  |  |
| Stk40         | F10           | Gprc5c        |  |  |
| 4930511A08Rik | Lym2          | Glyr1         |  |  |
| Spns2         | Rnf217        | Ppia          |  |  |
| Cuedc1        | Bhlha15       | Wdr18         |  |  |
| Blvrb         | Tnik          | Raet1c        |  |  |
| Vcpkmt        | Mtss1         | Pla2g6        |  |  |
| Kansl1l       | Clpx          | Ccdc71l       |  |  |
| Kmt2a         | Lman1         | Pip4k2c       |  |  |
| Zc3h7a        | Cpm           | Nol12         |  |  |
| Slc5a3        | Orc2          | Frs2          |  |  |
| Actr2         | 1700006H21Rik | Aars2         |  |  |
| Arid1a        | Lpin1         | Smim3         |  |  |
| Ube2m         | Serpinb8      | Snapc2        |  |  |
| Arhgap1       | Egr3          | Mpst          |  |  |

|               |               |               |  |  |
|---------------|---------------|---------------|--|--|
| Cs            | Mier2         | A130010J15Rik |  |  |
| Map2k1        | Zbtb24        | Zfp668        |  |  |
| Cbx1          | Gm10785       | Scd1          |  |  |
| Nt5dc3        | Ifitm3        | Trmt112       |  |  |
| Drc7          | Neu1          | Rps6kb1       |  |  |
| 0610009L18Rik | D17Wsu92e     | Apeh          |  |  |
| Recql5        | Acadm         | 1500011B03Rik |  |  |
| Mtmr4         | Sclt1         | Zcchc2        |  |  |
| Bsdc1         | Ddit3         | Stx4a         |  |  |
| Slc16a13      | Tmem39a       | Mtmr4         |  |  |
| Mir181c       | 2900009J06Rik | Patz1         |  |  |
| Arrdc2        | Arid5a        | Gss           |  |  |
| Nap1l4        | Myadm         | Khyn          |  |  |
| Mapt          | Ints6         | Abcg2         |  |  |
| Phb           | Zfp422        | Dctpp1        |  |  |
| Zfp397        | Cdk1          | Pctp          |  |  |
| Manba         | Nr3c2         | Rasal2        |  |  |
| Twf2          | Klf9          | Enoph1        |  |  |
| Plk4          | Serpinf1      | Fzd2          |  |  |
| Nfe2l2        | Psma6         | Clcn3         |  |  |
| Mir6541       | Akap5         | Stx4a         |  |  |
| Mad1l1        | Gm13872       | Dgat1         |  |  |
| Mir1893       | Cds2          | Lrrc8d        |  |  |
| Tdrd1         | Inpp4a        | Odf2          |  |  |
| Srgn          | Mfn1          | Cat           |  |  |
| Cdk19         | Serinc3       | Hes6          |  |  |
| Atp2b1        | Pdia4         | Ubtf          |  |  |
| Fam220a       | Npas4         | Tmem203       |  |  |
| Yif1b         | Ficn          | Sreb1         |  |  |
| Rasal2        | 4930441H08Rik | Nkiras2       |  |  |
| Spred1        | Bambi         | Zswim7        |  |  |
| Appl2         | Taf15         | Gm16998       |  |  |
| Mir6957       | Sgms1         | Zfp513        |  |  |
| Lrrfip1       | Batf3         | Stx8          |  |  |
| Gm3696        | Runx1         | Diablo        |  |  |
| Styx          | Setmar        | Slc30a5       |  |  |
| Glul          | Medag         | Mir6388       |  |  |
| Crip1         | Panx1         | 4931414P19Rik |  |  |
| Cep5711       | Tmem86a       | Msantd2       |  |  |
| Cks2          | 1700108F19Rik | Dcaf7         |  |  |
| Syne3         | Irx2          | Trip12        |  |  |
| Nutf2         | Ankrd13d      | Pdss2         |  |  |
| Efcab3        | Magoh         | Rpp38         |  |  |
| Akirin1       | St3gal1       | Erf           |  |  |
| Atp2b1        | Flywch1       | Ift81         |  |  |
| Ppp3r1        | Tomm6         | Sox18         |  |  |
| Cnot3         | Hapln2        | Zfp668        |  |  |
| Abhd5         | Gm19589       | Fam131a       |  |  |
| Mre11a        | Alkbh7        | Tmem131       |  |  |
| Mir7008       | Carhsp1       | Aen           |  |  |
| Glud1         | Commd10       | Arhgap8       |  |  |
| Dck           | Fdft1         | Surf4         |  |  |
| Entpd7        | Cd276         | Cfap45        |  |  |
| Nop56         | Rbm39         | Slc25a38      |  |  |
| Cdon          | Crip2         | Smyd2         |  |  |
| Sox6          | Cuta          | Borcs5        |  |  |
| Zmym6         | Eef1d         | Dgat2         |  |  |
| Rcn1          | C5ar2         | Zfp771        |  |  |

|               |               |              |  |  |
|---------------|---------------|--------------|--|--|
| Washc4        | Gcnt2         | Vps37a       |  |  |
| Herc3         | Usp1          | Ppox         |  |  |
| Mir5118       | Tmem132b      | Rbx1         |  |  |
| Ms4a10        | Jade2         | Nek8         |  |  |
| 1110002J07Rik | Plppr2        | Gsr          |  |  |
| Nt5c3         | Gm15787       | Noct         |  |  |
| Oxct2a        | Syne3         | Arf3         |  |  |
| Gabarapl2     | 2410131K14Rik | Rfwd3        |  |  |
| Rnu11         | Nemp2         | Gm21119      |  |  |
| Foxs1         | Mir1904       | Dnmt3b       |  |  |
| Slc26a6       | Hist1h2an     | Chuk         |  |  |
| Cass4         | Snhg10        | Memo1        |  |  |
| Senp8         | Stim2         | Hmgb2        |  |  |
| Lclat1        | Tfap4         | Blcap        |  |  |
| Epb4112       | Hist1h3e      | Lrrc74a      |  |  |
| Psen2         | Nlk           | Cse1l        |  |  |
| Rasgrp2       | Abhd16a       | Mpz1         |  |  |
| Rnu11         | Hist1h2bl     | Supt6        |  |  |
| Tmem168       | Ogfod2        | Wbp2         |  |  |
| Polr2d        | Mir1941       | Gcc1         |  |  |
| Ccdc130       | Hist1h3i      | Pygo2        |  |  |
| Akap13        | Fus           | Kif2a        |  |  |
| Skap2         | Gm11437       | Taf8         |  |  |
| Prkca         | Ubt2          | Cd300a       |  |  |
| Coro6         | Cnot3         | Zfp3611      |  |  |
| 4930488B22Rik | Evpl          | Src          |  |  |
| Wdr13         | Topbp1        | Itgb2        |  |  |
| Nabp2         | Zmym4         | Ubb          |  |  |
| 1810026B05Rik | E230025N22Rik | Xrcc4        |  |  |
| Lims1         | Sgca          | Ticrr        |  |  |
| Scd3          | Cited2        | Cse1l        |  |  |
| Tpbgl         | Agps          | Kif1b        |  |  |
| Tmem123       | Gmfg          | Hey1         |  |  |
| Osbpl8        | Psm14         | Brms1        |  |  |
| Ubxn6         | Gfi1          | Pacs1        |  |  |
| Akap13        | Slc17a5       | Gm9776       |  |  |
| Vmn2r23       | Pelp1         | Cep131       |  |  |
| Tmem181b-ps   | Rab4b         | Trim41       |  |  |
| Gosr2         | Fbxo3         | Tomm40       |  |  |
| Map2k4        | Dapp1         | Prpf40a      |  |  |
| Eif5a2        | Cactin        | Dbp          |  |  |
| Cnnm4         | Csnk1g2       | Cabin1       |  |  |
| Zfp91         | Camk2g        | Dnm2         |  |  |
| Apbb2         | Anapc11       | Exosc8       |  |  |
| Avpi1         | Mir7031       | Hist1h4h     |  |  |
| Milt10        | U2surp        | Mrps23       |  |  |
| D430042O09Rik | Zfpm1         | LOC102634389 |  |  |
| 4930564D02Rik | Hist2h3b      | Fkbp2        |  |  |
| Tigd2         | Hist1h3e      | Ube2z        |  |  |
| 2410131K14Rik | Dsel          | AA543186     |  |  |
| Dtl           | Mtfr1l        | Tpp2         |  |  |
| Rhbdd2        | Gm7008        | Fam58b       |  |  |
| Nfatc4        | Socs3         | Mar-02       |  |  |
| Sh3tc1        | Actr5         | Dazap1       |  |  |
| Bach2         | Ten1          | Gm13427      |  |  |
| Tor2a         | Ddx41         | Txn1         |  |  |
| Als2          | Snx21         | Gemin4       |  |  |
| Rasgef1b      | Akt2          | Herc2        |  |  |

|               |               |               |  |  |
|---------------|---------------|---------------|--|--|
| Tmem43        | Stk11         | Suv39h2       |  |  |
| Trrap         | Bend4         | Nptn          |  |  |
| Zfp933        | Bcl3          | Tex2          |  |  |
| Slc25a40      | Slc25a42      | Mxd4          |  |  |
| Usp53         | Hipk3         | Sp2           |  |  |
| Zfp119b       | 9430015G10Rik | Qser1         |  |  |
| 9130023H24Rik | Hspa12b       | Commd5        |  |  |
| Irf1          | Kctd2         | Rbl1          |  |  |
| Lin7b         | Acvr2b        | Gan           |  |  |
| Coa7          | Trap1         | Mir3960       |  |  |
| Acox1         | Arf1          | Catsper2      |  |  |
| Rassf3        | Cdk2ap2       | Sprr2a2       |  |  |
| Ubr5          | Ncbp3         | Nktr          |  |  |
| Eif4a1        | Unc119        | Prkca         |  |  |
| Fbxo33        | Slc25a42      | Tbc1d17       |  |  |
| 4930555G01Rik | Zcchc14       | Pisd-ps2      |  |  |
| Mrps18b       | Tjp1          | Pbx3          |  |  |
| Slc16a6       | Rnf19b        | Maz           |  |  |
| Mir681        | Gramd1b       | Atp5g2        |  |  |
| Zdhhc19       | Gpn1          | Ifitm5        |  |  |
| 4930559C10Rik | 1810062O18Rik | Psm8          |  |  |
| Scamp2        | Tdp1          | Inpp5d        |  |  |
| Atp6v1f       | Cyp4b1        | Selenos       |  |  |
| Mir7034       | Otud7b        | Slc5a3        |  |  |
| Gm14005       | Ahctf1        | Sclly         |  |  |
| Jpt1          | Nr1h2         | 6030468B19Rik |  |  |
| Mapk9         | Ssr1          | Dusp1         |  |  |
| Mtf2          | Napepld       | Trappc4       |  |  |
| Mapkapk2      | Nck1          | Zmat3         |  |  |
| Ppp2r5a       | Dennd4a       | Rnf170        |  |  |
| Epb41         | Sf1           | Galk1         |  |  |
| Rcan3         | Elk4          | Cwc25         |  |  |
| Tdp1          | Tmem94        | Uck2          |  |  |
| Ddx59         | Mar-07        | Ube2f         |  |  |
| Frat2         | Akap10        | Ulk2          |  |  |
| 1700064J06Rik | 1110020A21Rik | Cdipt         |  |  |
| Tbc1d7        | Thap1         | Zfp639        |  |  |
| Fndc7         | Rbm4b         | Fut8          |  |  |
| Cry2          | Tmem104       | Arid4a        |  |  |
| Pacsin2       | Pcyt2         | Fbxo18        |  |  |
| Zcchc8        | Pdpx          | Slc45a1       |  |  |
| Nt5c2         | Mir7235       | Rap1gap2      |  |  |
| Rad17         | Mreg          | St6galnac1    |  |  |
| Sptan1        | Cnot8         | Tln1          |  |  |
| Rab11fip4os2  | Rbbp5         | Mxd4          |  |  |
| Hist1h2an     | Tmcc1         | Eef2          |  |  |
| Eapp          | Qdpr          | Sgcd          |  |  |
| Ldha          | Rabep1        | Impdh1        |  |  |
| Vps37b        | Zswim4        | Dad1          |  |  |
| Dscr3         | Mrip          | St3gal1       |  |  |
| Gas2l1        | Banf1         | Eil2          |  |  |
| 4930515G01Rik | Pfkfb4        | Slc44a1       |  |  |
| Ahsa2         | Arrdc2        | Dleu2         |  |  |
| Dyrk1a        | 4933433G15Rik | Nktr          |  |  |
| Map2k4        | Pitpnm2       | Aldh6a1       |  |  |
| St7           | Mob1b         | Phf20         |  |  |
| Sympk         | Rnf14         | Gtf3c6        |  |  |
| Farp2         | Chka          | Ezh1          |  |  |



|               |               |            |  |  |
|---------------|---------------|------------|--|--|
| Phf13         | Coq10b        | Stx5a      |  |  |
| Ino80         | 0610037L13Rik | Aftph      |  |  |
| Magi3         | Map1lc3b      | Banp       |  |  |
| Kif2c         | Cc2d1b        | BC037704   |  |  |
| Cpsf6         | Acot7         | Ivns1abp   |  |  |
| Fus           | Mir21a        | Grpel1     |  |  |
| Mef2a         | Carm1         | Cirbp      |  |  |
| Prpf3         | Guca2b        | Trp53inp2  |  |  |
| Rpl21         | Kansl3        | Stx12      |  |  |
| Ranbp3        | Med4          | Dot1l      |  |  |
| Cmas          | Ggta1         | Thoc6      |  |  |
| Samd14        | Arid1a        | B3gnt1     |  |  |
| Chd2          | Rpia          | Ints3      |  |  |
| Smim3         | Mgea5         | Slc25a28   |  |  |
| Hook2         | Mir144        | Nr6a1      |  |  |
| Snhg9         | Vgf           | Atf7       |  |  |
| Dcaf11        | Hrh1          | Fem1b      |  |  |
| Ssb           | Atp6v0c       | Kifc1      |  |  |
| Dlx3          | Ndor1         | Pias4      |  |  |
| Pcbp1         | Med16         | Nrd1       |  |  |
| Cdkn2aip      | Cep112        | Cnot10     |  |  |
| Ankzf1        | Dcaf11        | Pard3      |  |  |
| Adgr1         | Qpctl         | Gins1      |  |  |
| Src           | Nectin2       | Tomm20     |  |  |
| Slc39a1       | Anxa11        | Srrm2      |  |  |
| Il17ra        | Emilin2       | Phactr4    |  |  |
| Arrdc3        | Sod1          | Yy1        |  |  |
| Sod1          | Xxylt1        | Tnk2       |  |  |
| Mir23a        | Arfgap3       | Aph1c      |  |  |
| Ypel3         | Ppp4c         | Gm4285     |  |  |
| Hmgn2         | Spag4         | Nfatc2ip   |  |  |
| Calm2         | Avl9          | Ier2       |  |  |
| 4933433G15Rik | Dcaf11        | Zbtb21     |  |  |
| Mtrn12        | Gcsh          | Speer8-ps1 |  |  |
| Ubiad1        | Gm21944       | Cetn3      |  |  |
| Prkca         | Myo10         | Sart3      |  |  |
| Anapc11       | Ostf1         | Elf1       |  |  |
| Atxn7l3       | Ing5          | Park7      |  |  |
| Arrdc2        | Nsun2         | Kctd9      |  |  |
| Ptch1         | Fam193a       | Prkca      |  |  |
| Swt1          | Taok3         | Galnt10    |  |  |
| Ing5          | Stam2         | Cyfp2      |  |  |
| Ctdsp2        | Traf2         | Ctdsp1     |  |  |
| E130307A14Rik | Gm20753       | Sfr1       |  |  |
| Rhoa          | Klf10         | Afmid      |  |  |
| Glg1          | Luzp1         | Npc2       |  |  |
| Arl2          | Hmg20b        | Dnajb12    |  |  |
| Mta3          | 5031439G07Rik | Natd1      |  |  |
| Sp2           | Zfp511        | Larp4      |  |  |
| Sp1           | G530011O06Rik | Hnrnpk     |  |  |
| Mir144        | Rnf7          | Tmem170    |  |  |
| Cisd2         | Nfe2l2        | Slc43a2    |  |  |
| Rere          | Ccng2         | Cuedc1     |  |  |
| Gga1          | P2ry1         | Grpel1     |  |  |
| Nemp2         | Atg7          | Serp1      |  |  |
| Stt3b         | Elf2          | Sgk1       |  |  |
| Pdik1l        | Txnrd1        | Gm15663    |  |  |
| Abl2          | Snap47        | Rrp8       |  |  |

|               |               |               |  |  |
|---------------|---------------|---------------|--|--|
| Pole4         | Pcf11         | Trim28        |  |  |
| Lin52         | Hist1h1c      | Mir3473c      |  |  |
| Ogfod2        | Flot1         | Wbp1          |  |  |
| Zfp422        | Farp2         | 4930563E22Rik |  |  |
| Synrg         | Paqr7         | Pink1         |  |  |
| Gck           | Ehd4          | Fam102a       |  |  |
| Ncapd2        | Smarca5       | Sgms1         |  |  |
| Zhx3          | Cluh          | Cul7          |  |  |
| Mir3473c      | Rad21         | Tmem158       |  |  |
| Ccnc          | Ugp2          | Scd2          |  |  |
| Gm5547        | Mir484        | Lrrc58        |  |  |
| Nfkb2         | Atad3a        | Csrp2         |  |  |
| Polr2j        | Ugp2          | Strip1        |  |  |
| Ogfod2        | Selenop       | Rmi2          |  |  |
| Tm2d3         | Sap30bp       | Zfp619        |  |  |
| H6pd          | 9130023H24Rik | Pdim1         |  |  |
| Oxsm          | 1810058I24Rik | Dynlt1f       |  |  |
| Gpr171        | Zranb2        | Megf9         |  |  |
| Btrc          | Svbp          | Stx1a         |  |  |
| Olfm1         | Mir3473c      | Trim33        |  |  |
| Usp32         | Commd7        | Sirt6         |  |  |
| Stt3b         | Ugp2          | Cdon          |  |  |
| Map7          | Zfp46         | Lats2         |  |  |
| Evpl          | Arl6ip1       | Xrcc5         |  |  |
| Cstf2         | Zkscan6       | Gne           |  |  |
| 2700038G22Rik | Tnlp1         | G630071F17Rik |  |  |
| Siva1         | Tmem250-ps    | Abr           |  |  |
| Jdp2          | Ppp2ca        | 5031425E22Rik |  |  |
| Tmcc1         | Elovl5        | Cln5          |  |  |
| 1110036E04Rik | Trim47        | Zfp712        |  |  |
| Snhg4         | Itrip1        | Selenoo       |  |  |
| Arfgap2       | Gm14207       | Adnp2         |  |  |
| Elf2          | Txn1          | Iqgap3        |  |  |
| Gmfg          | Zfp143        | 9330151L19Rik |  |  |
| Ppp4r3b       | E2f1          | Wdfy3         |  |  |
| Borcs5        | Rnf220        | Syce2         |  |  |
| Tbc1d1        | Cdkn2aip      | Hsph1         |  |  |
| Snx14         | Mxd1          | Sec16a        |  |  |
| Mmadhc        | Lipt2         | Dhps          |  |  |
| Cntnap5b      | Uqcrq         | Pex19         |  |  |
| Tdrd7         | Dstn          | Mrps36        |  |  |
| Ablim2        | Nudt18        | Rhag          |  |  |
| Acsl1         | Kdm3a         | Tex30         |  |  |
| Pcgf5         | Efcab3        | Maml3         |  |  |
| 1700012A03Rik | Golph3l       | Hecw2         |  |  |
| 4930557F10Rik | Agpat5        | 4930554C24Rik |  |  |
| Gtpbp10       | Crk           | Mir21a        |  |  |
| Atg5          | Psma2         | Ybx3          |  |  |
| Adam17        | Epb41         | Rfxap         |  |  |
| Gm5796        | Gigyf2        | Irgq          |  |  |
| Hs6st1        | Mob4          | Samm50        |  |  |
| Gss           | Cnih1         | Irf2bp1       |  |  |
| Dtnbp1        | Ypel2         | Sh3bp4        |  |  |
| Mir22hg       | Cbfa2t3       | 2700038G22Rik |  |  |
| Esm1          | Srm           | Gm35978       |  |  |
| Pank3         | Ypel3         | Gm7854        |  |  |
| Pkd112        | Dera          | Cnep1r1       |  |  |
| Alox5         | Gosr2         | Lilr4b        |  |  |

|               |               |              |  |  |
|---------------|---------------|--------------|--|--|
| Tpm3          | Lactb         | Iqcd         |  |  |
| Gsdmc         | Usp28         | Rhobtb3      |  |  |
| Smad6         | Rfng          | Hist1h2bq    |  |  |
| Gm4285        | Prpsap2       | Plpbp        |  |  |
| Kdsr          | Rbm15b        | Mphosph6     |  |  |
| Sacm1l        | Ctr9          | Chpf         |  |  |
| Nav2          | Hfe2          | LOC106557447 |  |  |
| Ring1         | Dlg4          | Cpeb4        |  |  |
| Arrdc4        | Txn1          | Rnpc3        |  |  |
| C030034I22Rik | Gpbp111       | Zfp608       |  |  |
| Ddx51         | Kat6b         | Myo5c        |  |  |
| Atad5         | Clcn6         | Gadd45g      |  |  |
| Ube2n         | Hist1h2be     | Mall         |  |  |
| Crk           | Scd3          | Kctd3        |  |  |
| Ufsp1         | Cacybp        | Pdc5         |  |  |
| Cd244         | Colgalt1      | Dcun1d1      |  |  |
| Coro1c        | 3110056K07Rik | Mgst2        |  |  |
| Larp1         | Tssc4         | Rab10        |  |  |
| Seh1l         | C2cd2l        | Arhgap25     |  |  |
| Atg4d         | Bax           | Ilf6ra       |  |  |
| Atf6          | Hexim1        | Ubxn4        |  |  |
| Zdhhc3        | Mir8112       | Pfkfb3       |  |  |
| Mrpl12        | Alg14         | Nckap1       |  |  |
| Slfn14        | Mcrip2        | Dapk1        |  |  |
| Magi1         | Mir5136       | Cldn12       |  |  |
| 2310033P09Rik | Slc35e3       | Tmem217      |  |  |
| Trim7         | 3110056K07Rik | Ttc7b        |  |  |
| Nf1           | Ubtf          | Glrx3        |  |  |
| Zfp985        | Reep6         | Tpra1        |  |  |
| Hnrnpr        | Tacc3         | Nol7         |  |  |
| Stk11ip       | Ogg1          | Gfpt1        |  |  |
| Mxd1          | Mfsd5         | Rapgef2      |  |  |
| Sez6          | Hint2         | Maea         |  |  |
| Gm13290       | Hist1h2bc     | Zfp707       |  |  |
| Gm7160        | Git2          | Dennd3       |  |  |
| Xpo1          | Phf1          | Gm13032      |  |  |
| Actb          | Rap2a         | Mybbp1a      |  |  |
| Inpp5k        | Fam109b       | Fa2h         |  |  |
| A730008H23Rik | Olf161        | Nrip3        |  |  |
| Prkag2os1     | Cep131        | Gcnt1        |  |  |
| Sart3         | 0610010F05Rik | Bmf          |  |  |
| Pias3         | Crk           | Mroh1        |  |  |
| Exoc7         | Sbno1         | Fahd1        |  |  |
| Exosc7        | Ccr1          | Zfp446       |  |  |
| Rras          | Nf1           | Taf6         |  |  |
| Cdk2ap2       | Mbd6          | Pih1d1       |  |  |
| Mospd3        | Wdr82         | Fahd1        |  |  |
| Pard3         | Lzts1         | Tsfm         |  |  |
| Smarca4       | Sarm1         | Zcchc17      |  |  |
| Lemd1         | Hspg2         | Kif18b       |  |  |
| Wnk4          | Zfand2a       | Gm5547       |  |  |
| Prex1         | Rab8b         | Neil3        |  |  |
| Herpud1       | Smurf1        | Bach2        |  |  |
| Prpf40a       | Efcab2        | Gstm1        |  |  |
| Slc12a4       | Nrtn          | Tfg          |  |  |
| Bcs1l         | Efcab2        | Slfn14       |  |  |
| Chka          | Iqgap1        | Kctd10       |  |  |
| Atg7          | Mcm2          | Extl3        |  |  |

|               |               |               |  |  |
|---------------|---------------|---------------|--|--|
| Mtag2         | Aaed1         | Irak4         |  |  |
| Sp1           | Rps19         | Mcm8          |  |  |
| Zfp768        | Park7         | Rpl34         |  |  |
| Kif21b        | Tmem19        | Ptpn21        |  |  |
| Dcaf5         | Pard6b        | Dock8         |  |  |
| Mpz11         | Specc1        | Akap6         |  |  |
| Cd164         | Cdkn2aipnl    | Aplp2         |  |  |
| Csrp1         | Ctdsp1        | Mtg1          |  |  |
| Gm14005       | Cherp         | Phf3          |  |  |
| Kif2c         | Rgl2          | Znrf1         |  |  |
| Tmem203       | Lin7b         | Zbtb43        |  |  |
| Narf          | Comp          | Col18a1       |  |  |
| Ywhaz         | Tex14         | Rhoq          |  |  |
| Pik3ip1       | Usf1          | Tra2a         |  |  |
| Rara          | Tex14         | Lym7          |  |  |
| Fastkd5       | Cry2          | 4930404I05Rik |  |  |
| Pmf1          | S100pbp       | Eif2ak3       |  |  |
| Metap1        | Esyt2         | Fam49a        |  |  |
| Aco2          | Mtf1          | Zdhhc5        |  |  |
| Dusp1         | Srsf7         | Sec62         |  |  |
| Cpsf2         | Trmt10a       | Ehd1          |  |  |
| Cdan1         | Rps6ka1       | Gm15706       |  |  |
| Srsf3         | Pstpip1       | Gse1          |  |  |
| Fancc         | Unc13d        | Kif1c         |  |  |
| Ncaph2        | B230217O12Rik | Crem          |  |  |
| Cops3         | Zmynd8        | Mycbp         |  |  |
| Ano10         | Nupl1         | Wnt7b         |  |  |
| Zfp985        | Inpp5k        | Golga1        |  |  |
| Cks2          | Tmem161b      | Mybl2         |  |  |
| Chn1          | Wisp3         | N6amt1        |  |  |
| Eprs          | Hps4          | Agpat1        |  |  |
| Usp48         | Pmepa1        | 4933401D09Rik |  |  |
| Faf2          | Mcf2          | Ccng1         |  |  |
| Pim1          | Ccdc130       | Gm33677       |  |  |
| Sep-09        | Hist4h4       | Gm29679       |  |  |
| Galnt10       | Mirt1         | Zfp866        |  |  |
| Galnt10       | B3gnt4        | Mars2         |  |  |
| Ost4          | 5730507C01Rik | Abca13        |  |  |
| Mrpl27        | Wfs1          | Mtpn          |  |  |
| Zswim3        | Syt7          | Pcyox1        |  |  |
| Idh2          | Lin52         | Kank2         |  |  |
| St3gal3       | Zfp593        | Kptn          |  |  |
| Mphosph6      | Kif14         | Mak16         |  |  |
| 1700024I08Rik | Pabpc1        | Anxa7         |  |  |
| Pmm1          | Idi1          | 1810041H14Rik |  |  |
| Sf3b5         | Dlc1          | Wdr34         |  |  |
| Pmepa1        | Kti12         | Crem          |  |  |
| Mras          | Ccdc80        | Fam114a2      |  |  |
| Tmem151b      | Mon1b         | Triobp        |  |  |
| Psap          | Stk4          | Tcf25         |  |  |
| 8030442B05Rik | Rnf19a        | Cnksr3        |  |  |
| Eif2ak3       | Atp6v0d1      | Dyrk3         |  |  |
| Raf1          | Per3          | Cct6b         |  |  |
| Pfkip         | Rrm2          | Cs            |  |  |
| St6galnac1    | Gm5797        | Malat1        |  |  |
| Ier2          | Pgm3          | Cyb5r1        |  |  |
| Wnt5b         | Ski           | Tbc1d10a      |  |  |
| Stk10         | Phf20I1       | Tonsl         |  |  |

|         |               |               |  |  |
|---------|---------------|---------------|--|--|
| Stxbp5l | Eif4a2        | Lig3          |  |  |
| Nuak2   | Stxbp5l       | Rabggt        |  |  |
| Fitm2   | Atp8a1        | Chn1          |  |  |
| Ptpn12  | Noc2l         | Tlk1          |  |  |
| Aaed1   | St3gal6       | Usf3          |  |  |
| Lctl    | Hist2h2aa2    | Exd1          |  |  |
| Tiparp  | Atp10d        | Susd6         |  |  |
| Abce1   | Bbc3          | Spred2        |  |  |
| Pcif1   | Cd200r3       | Zbtb1         |  |  |
| Prkci   | 8430426J06Rik | Fancc         |  |  |
| Ngdn    | Sirt4         | Eed           |  |  |
| Copg1   | Foxs1         | Srek1         |  |  |
| Snhg10  | Myct1         | Dcaf4         |  |  |
| Rcor1   | Smad6         | Ampd2         |  |  |
| Sh2b3   | Id4           | Casp9         |  |  |
| Crocc   | Esm1          | Sptlc2        |  |  |
| Ppp6r1  | C77080        | Ulk1          |  |  |
| Polr3h  | Zfp521        | Gdpd1         |  |  |
| Gm21119 | Mdga1         | 1700055C04Rik |  |  |
| Nfyc    | Mis18a        | Pym1          |  |  |
| Tiparp  | Psma1         | Sgf29         |  |  |
| Myh10   | A530013C23Rik | Cox20         |  |  |
| Cxxc5   | BC051665      | Rabggt        |  |  |
| Borcs5  | Zfp994        | Sox12         |  |  |
| Txndc9  | Unk           | Akap11        |  |  |
| Ccdc9   | Ero1lb        | Zfp3          |  |  |
| B3galt4 | Slc7a11       | Nudt1         |  |  |
| Pdk2    | Vrk1          | Mir6769b      |  |  |
| Crk     | Ccdc87        | Rheb          |  |  |
| Gm10941 | Mdm1          | Ubxn6         |  |  |
| Ncl     | Stx2          | Lmln          |  |  |
| Srsf5   | Nepro         | Trmt61a       |  |  |
| Bbip1   | Blm           | Pdlim7        |  |  |
| Usf1    | Nt5c2         | Mrpl12        |  |  |
| Alg12   | Kcnj16        | Zfp787        |  |  |
| Nfe2l2  | Rad54b        | Slc6a6        |  |  |
| Olf161  | Tbccd1        | Mir5128       |  |  |
| Ttf2    | A630001O12Rik | Rps15         |  |  |
| Elov15  | Afg3l1        | Rpl27         |  |  |
| Ncoa3   | Icam2         | Bach2         |  |  |
| Mapk14  | Dpf1          | Simc1         |  |  |
| Pemt    | Arhgef28      | Fam3c         |  |  |
| Ccnd3   | Tjp1          | Cdk13         |  |  |
| Map3k7  | Zfp608        | Slc35f5       |  |  |
| Hmgcs1  | Fbxo47        | Lypd4         |  |  |
| Ptp4a3  | Ankle2        | Vdac1         |  |  |
| Nmt1    | Ybx3          | Zfp787        |  |  |
| Sipa111 | Ltv1          | Samm50        |  |  |
| Cfap46  | Zfp521        | Paxx          |  |  |
| Uvrag   | Tspan15       | Ptges3        |  |  |
| Auh     | H2afx         | Rpl35         |  |  |
| P2rx4   | Akap7         | Shank3        |  |  |
| Hmg20b  | Ints4         | Cep83os       |  |  |
| Yes1    | Zhx1          | Ilf2          |  |  |
| Rap2a   | Hspb7         | Cnpy2         |  |  |
| Jpt2    | Socs7         | Dynlrb1       |  |  |
| Btg2    | Tmem192       | Klrb1c        |  |  |
| Afmid   | Glit28d2      | Hist1h2af     |  |  |
